# Supplementary material for: Indirubin-3’-monoxime acts as proteasome inhibitor: Therapeutic application in multiple myeloma
Source: PubMed Central journal article supplement — eBioMedicine. 2022 Mar 26;78:103950. doi: 10.1016/j.ebiom.2022.103950 (PMC8958548; doi:10.1016/j.ebiom.2022.103950), 2022-03-26

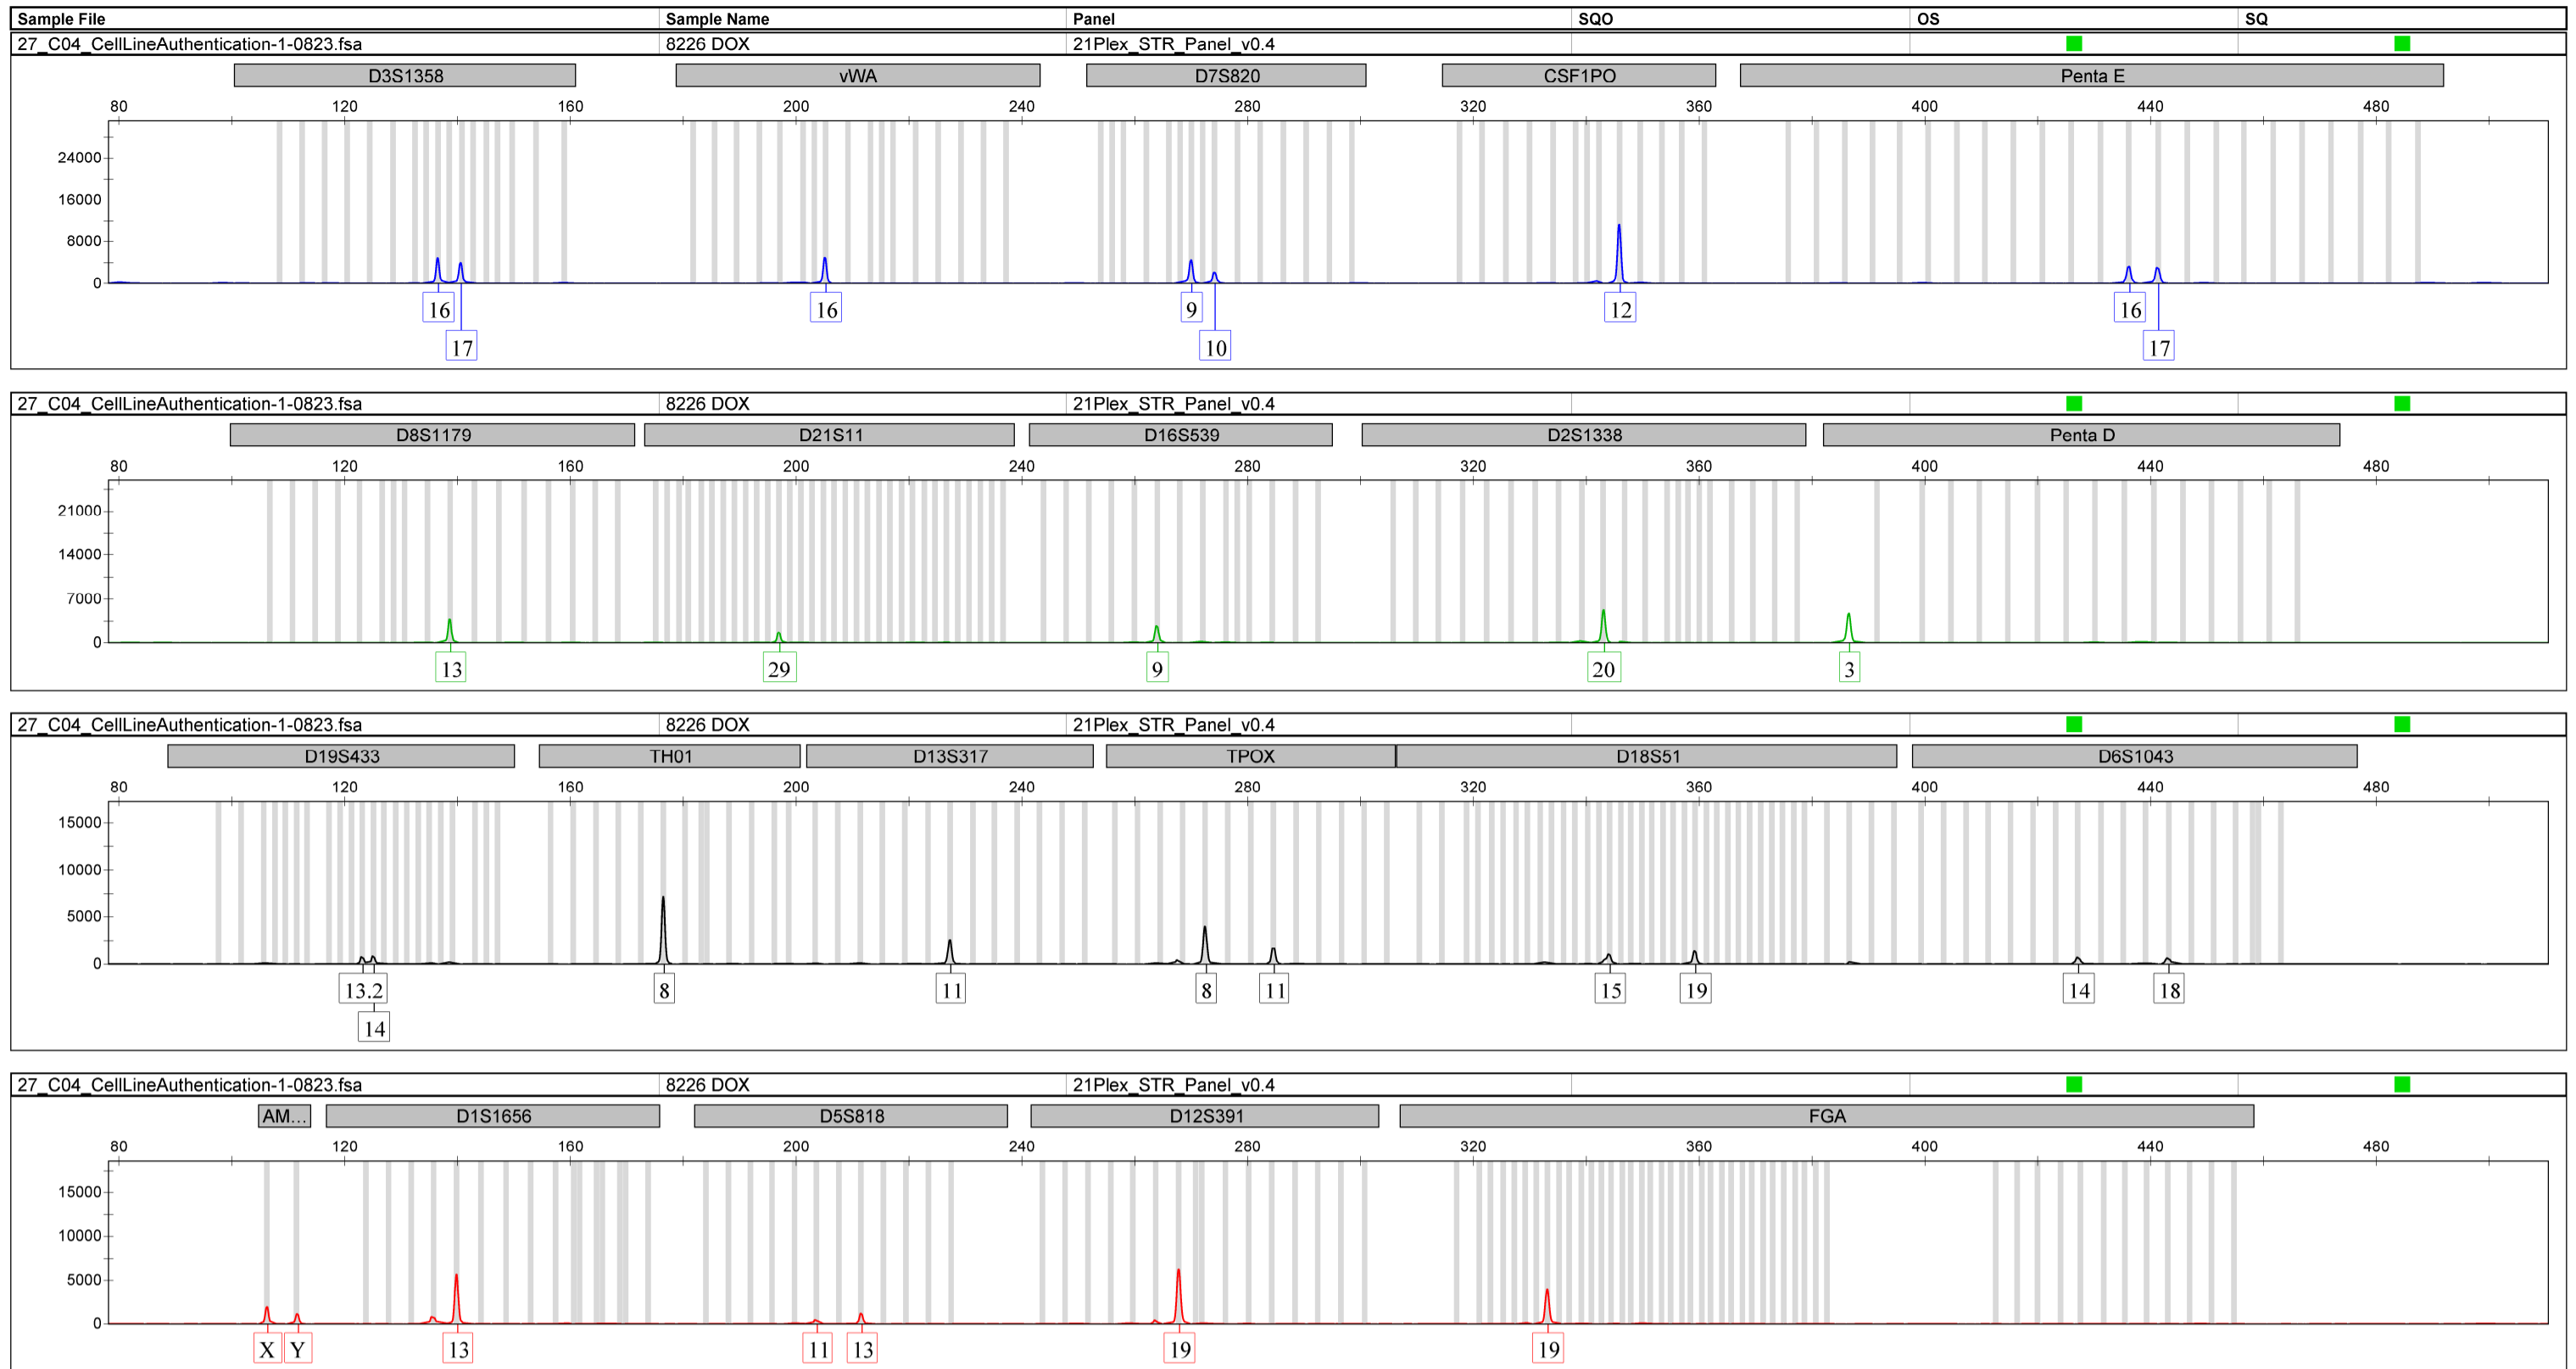

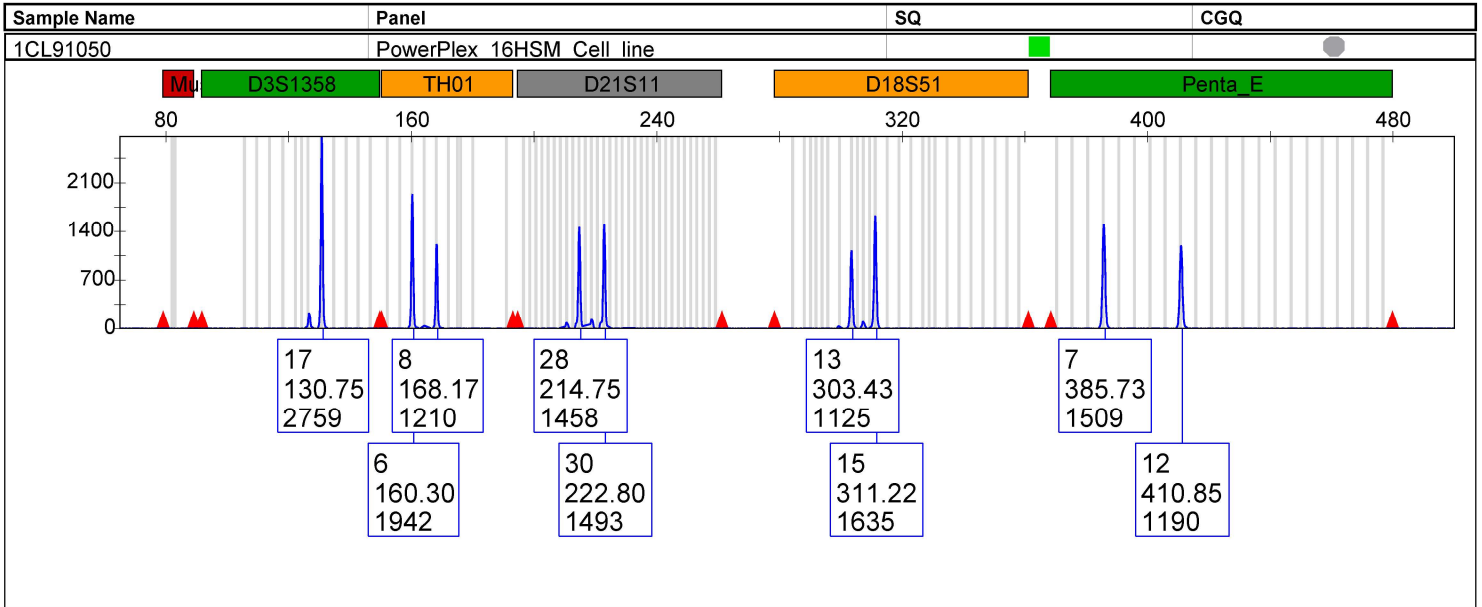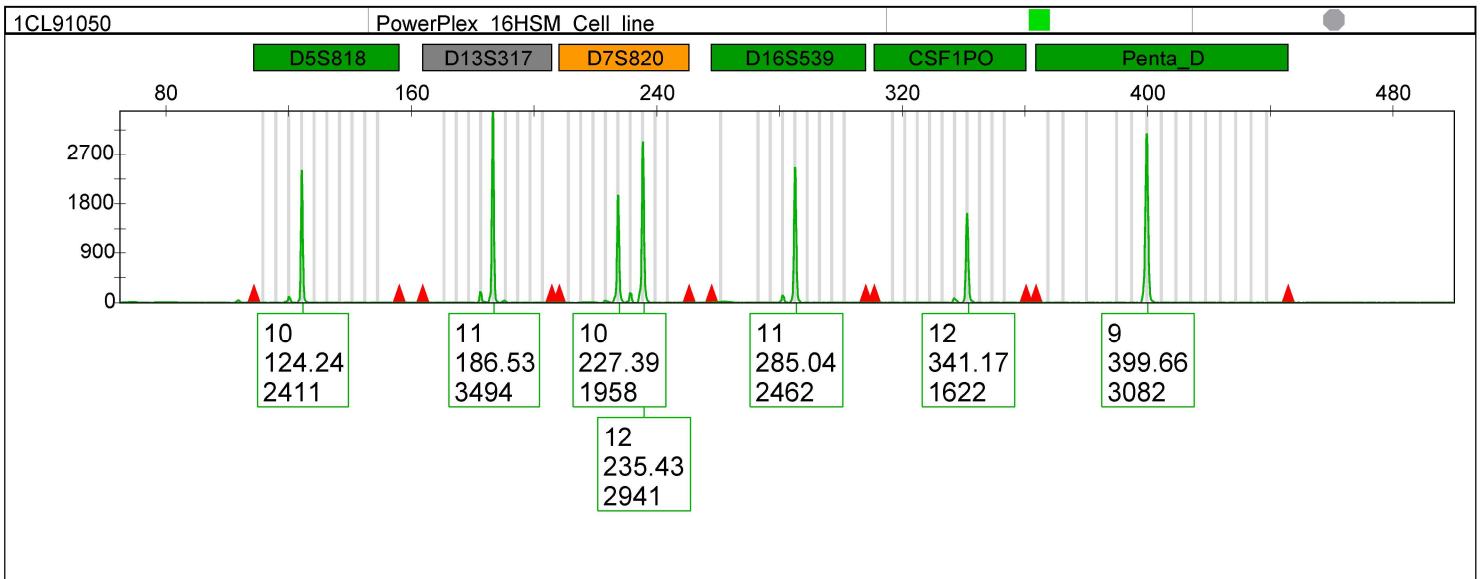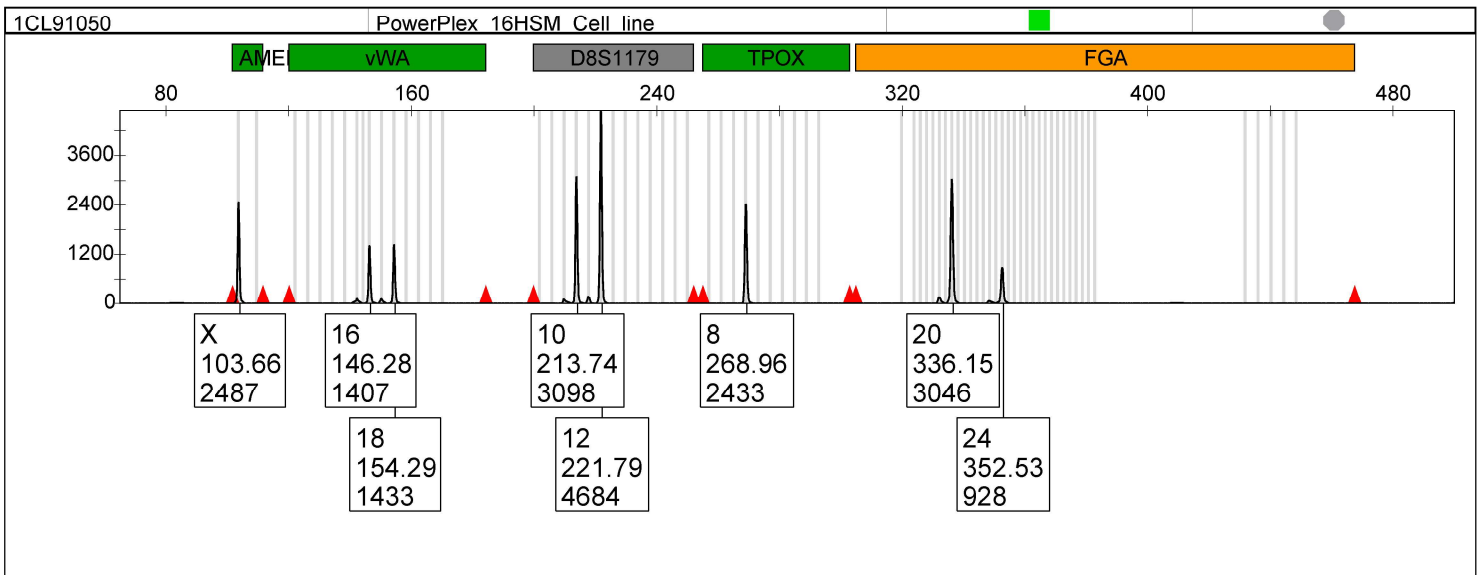

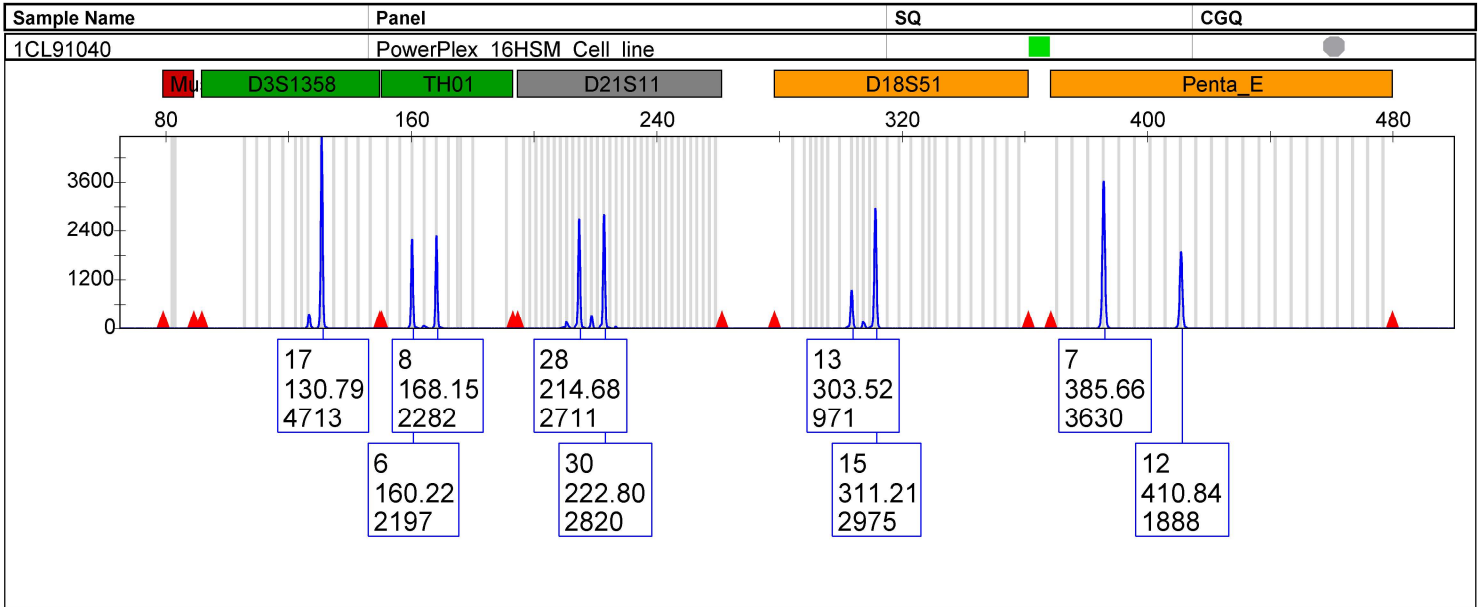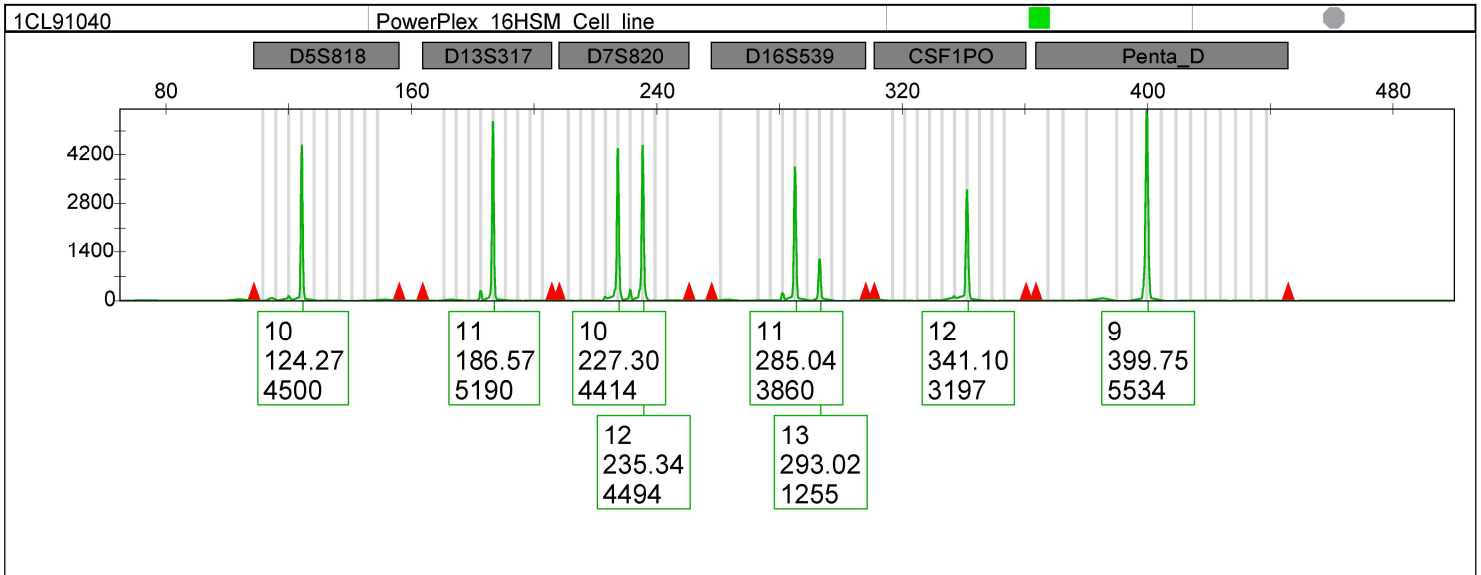

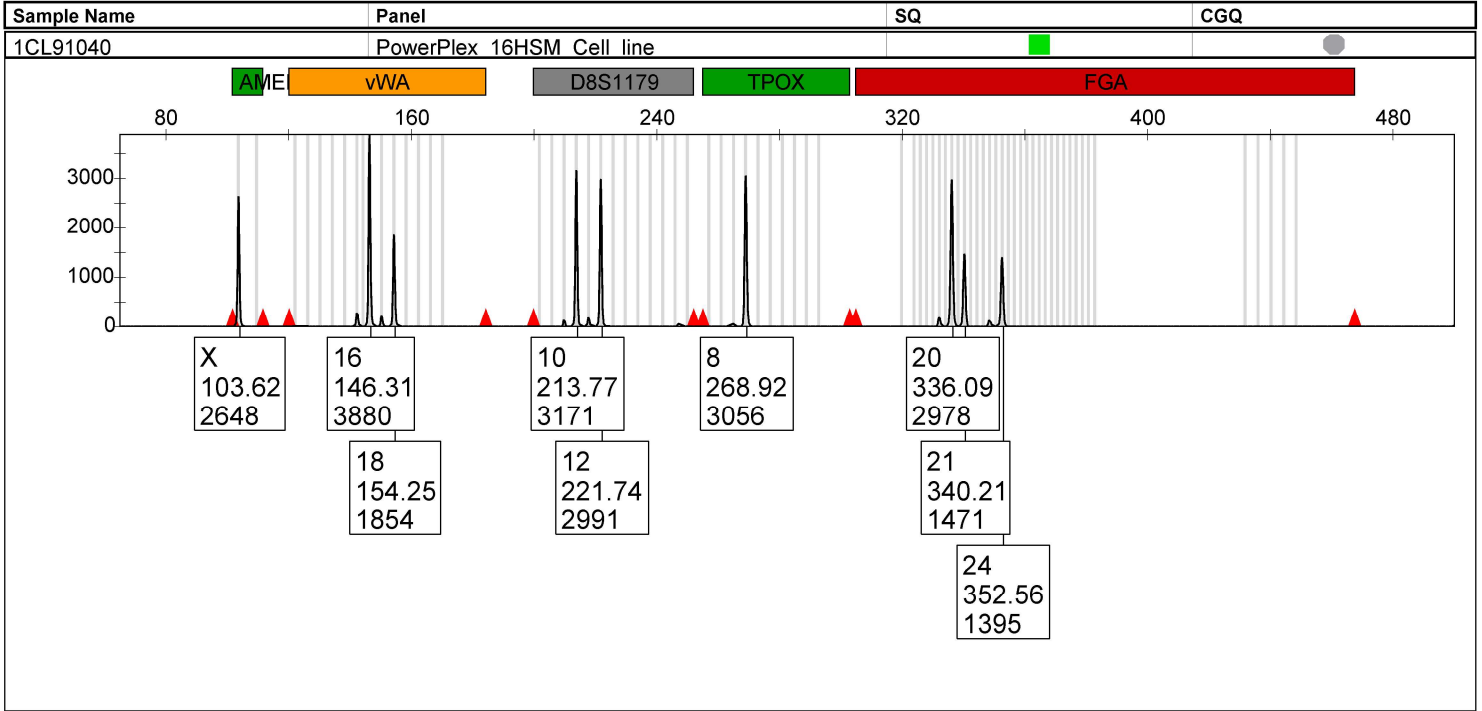

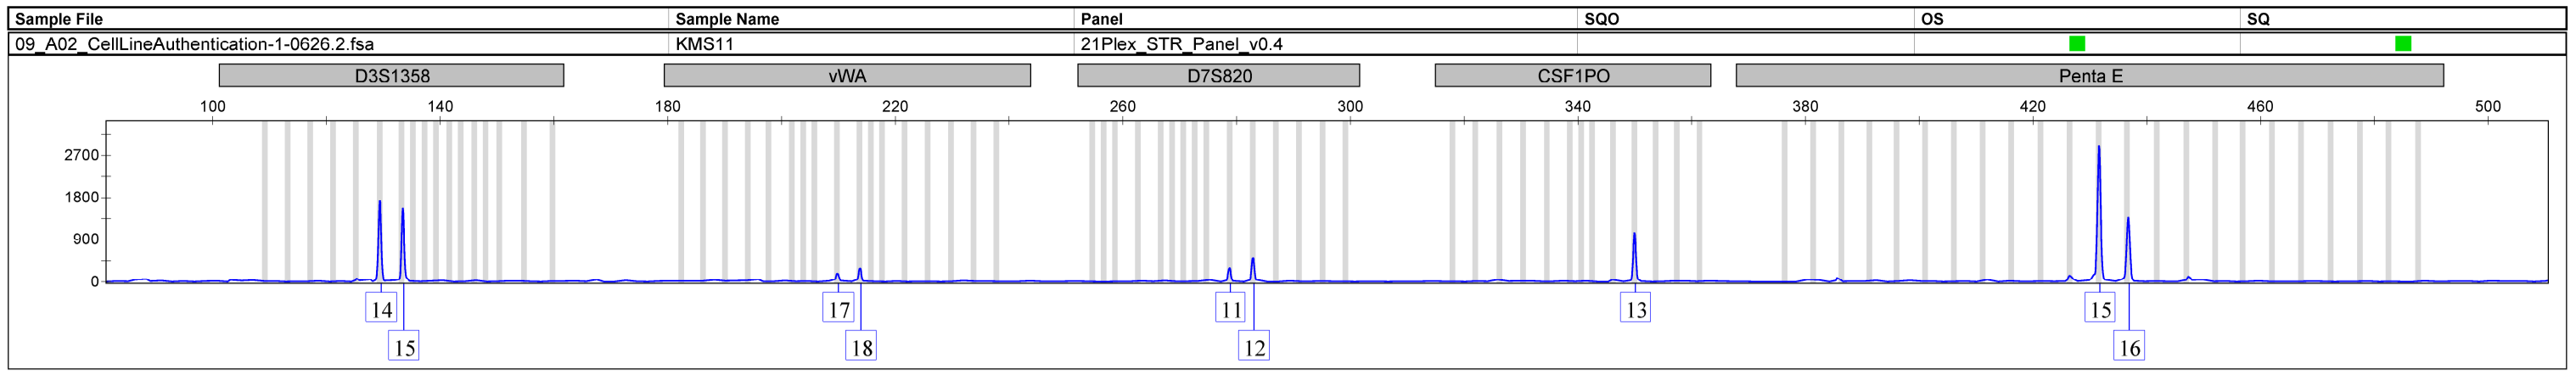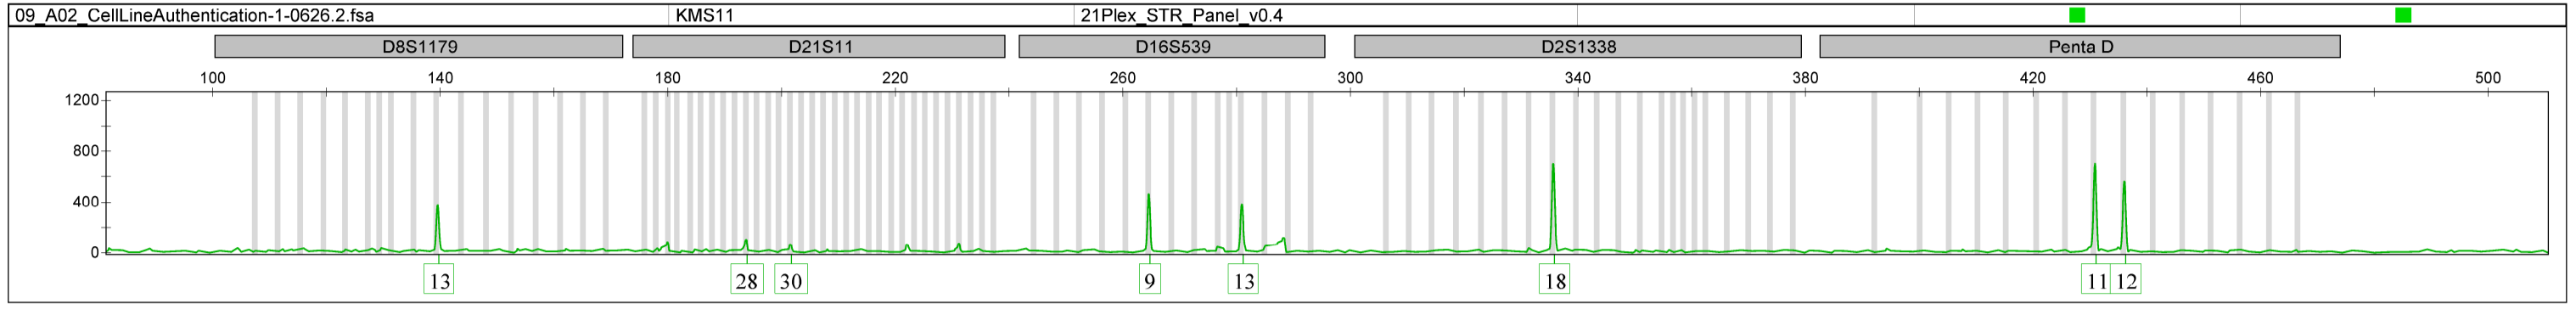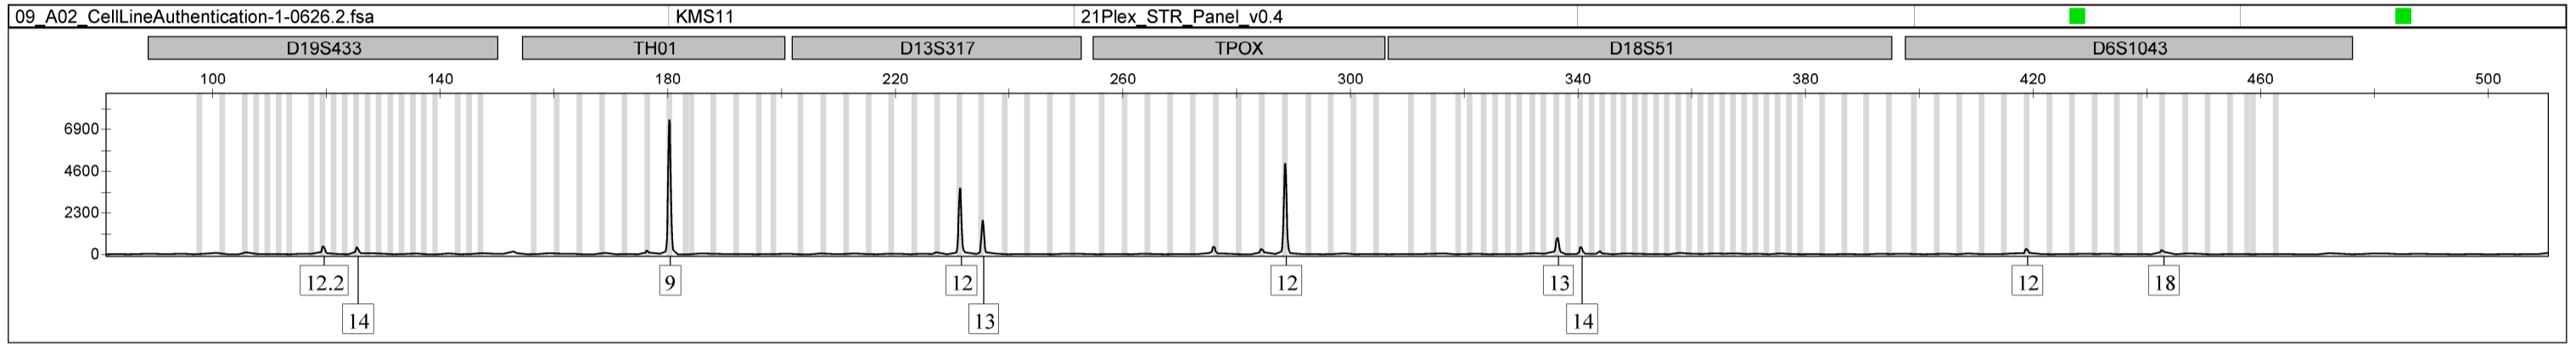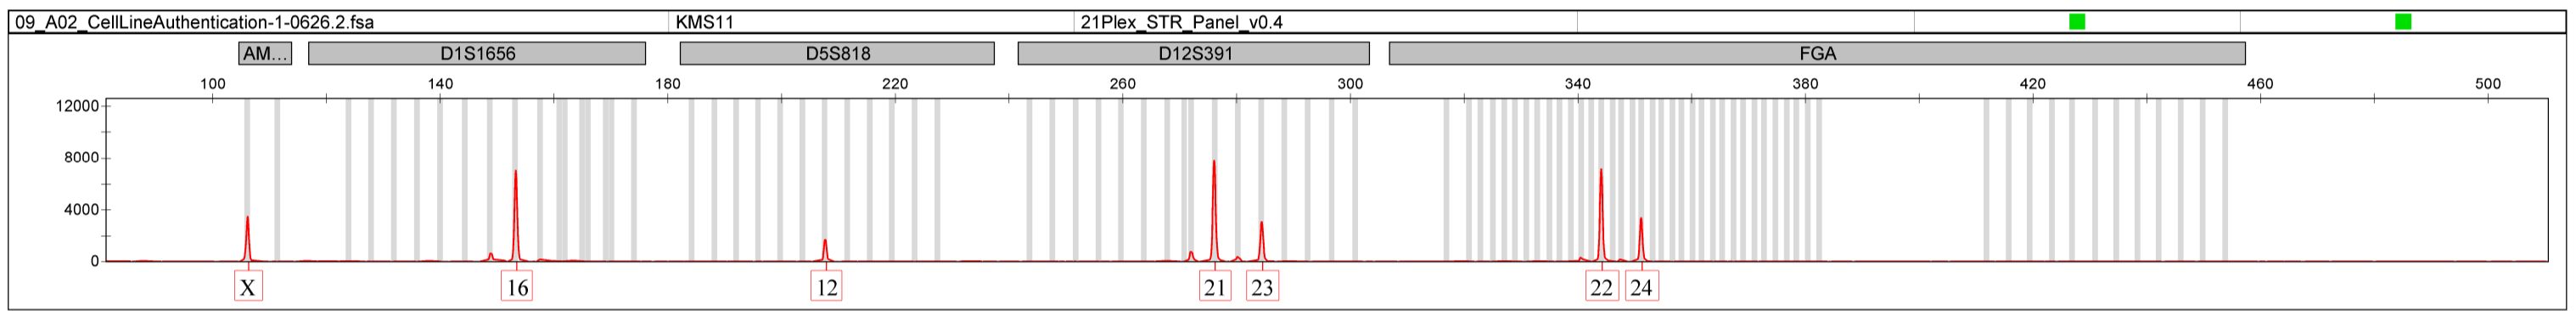

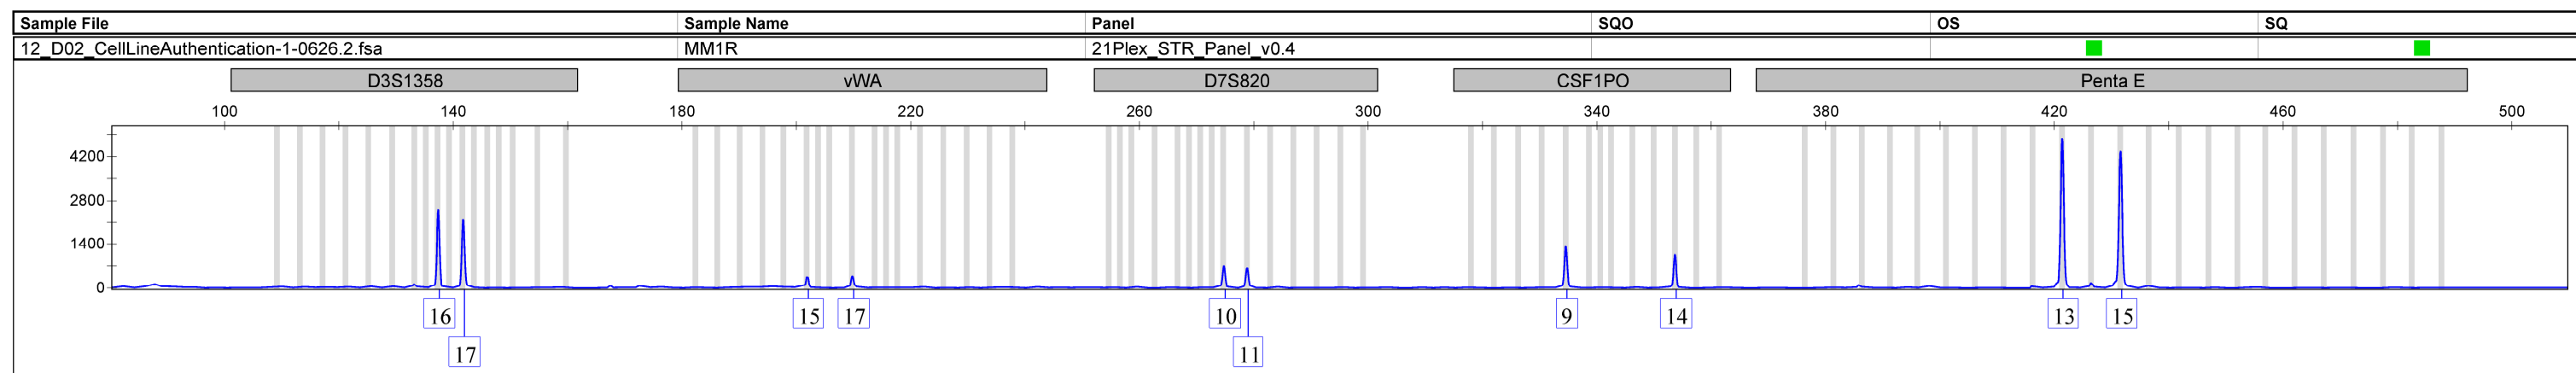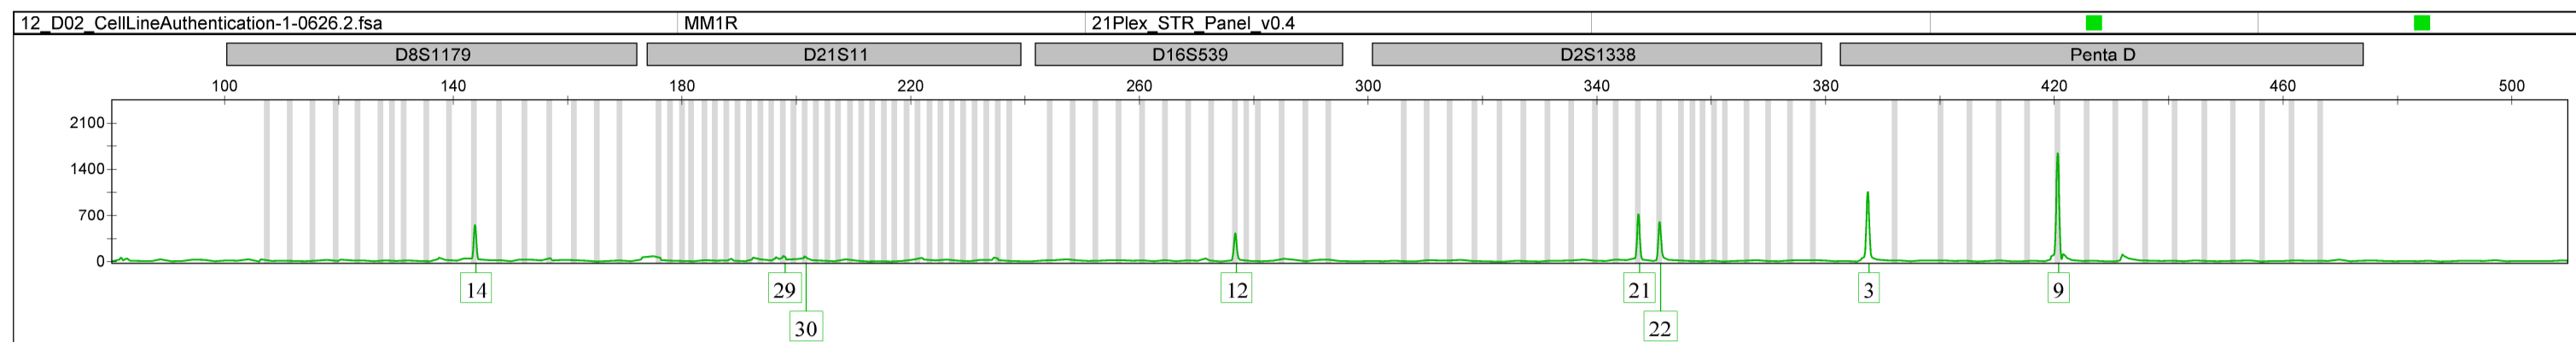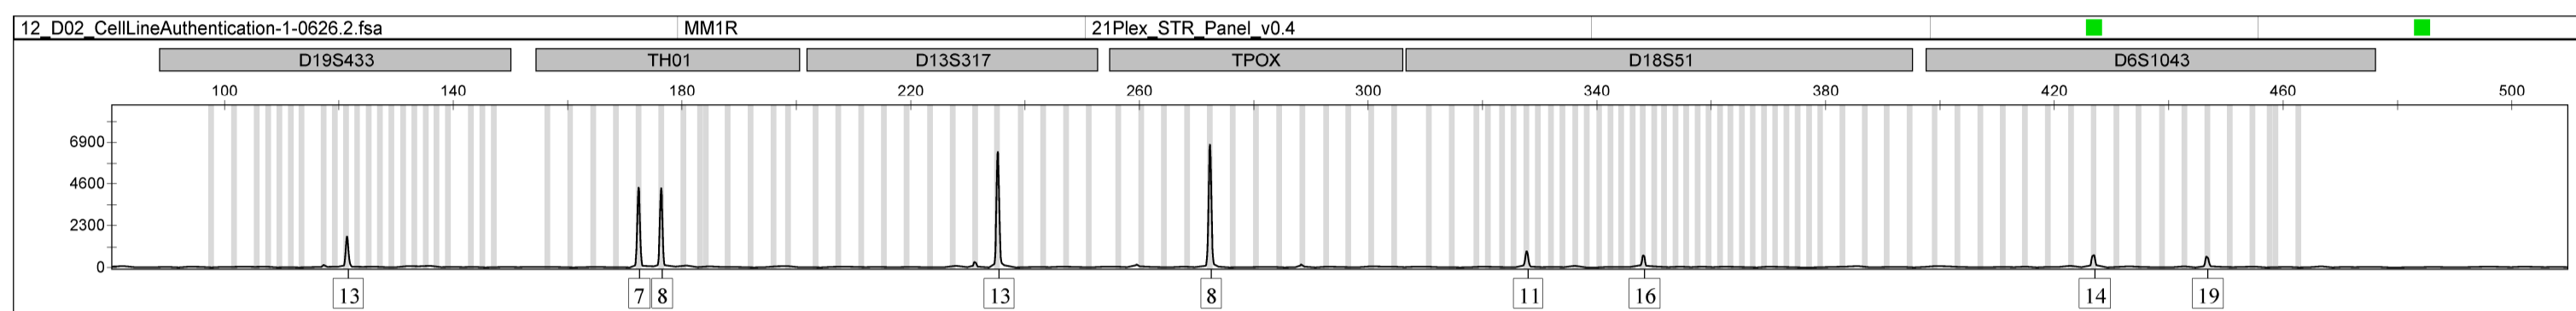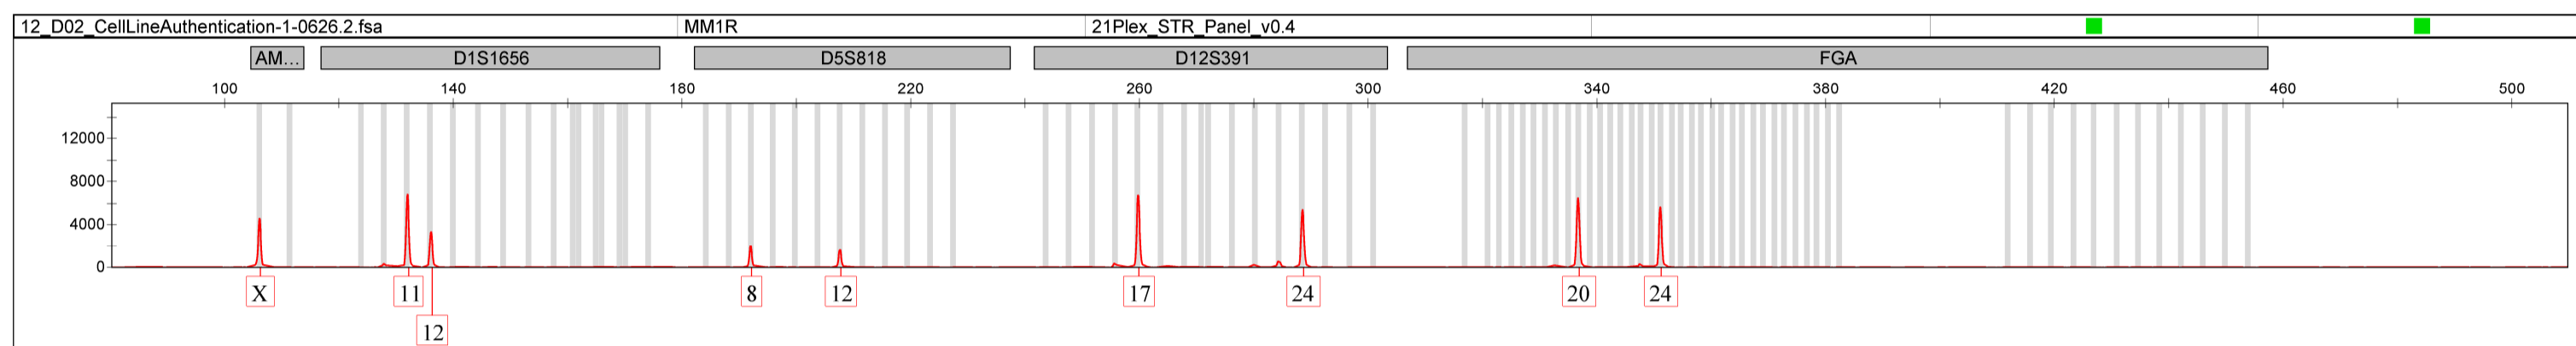

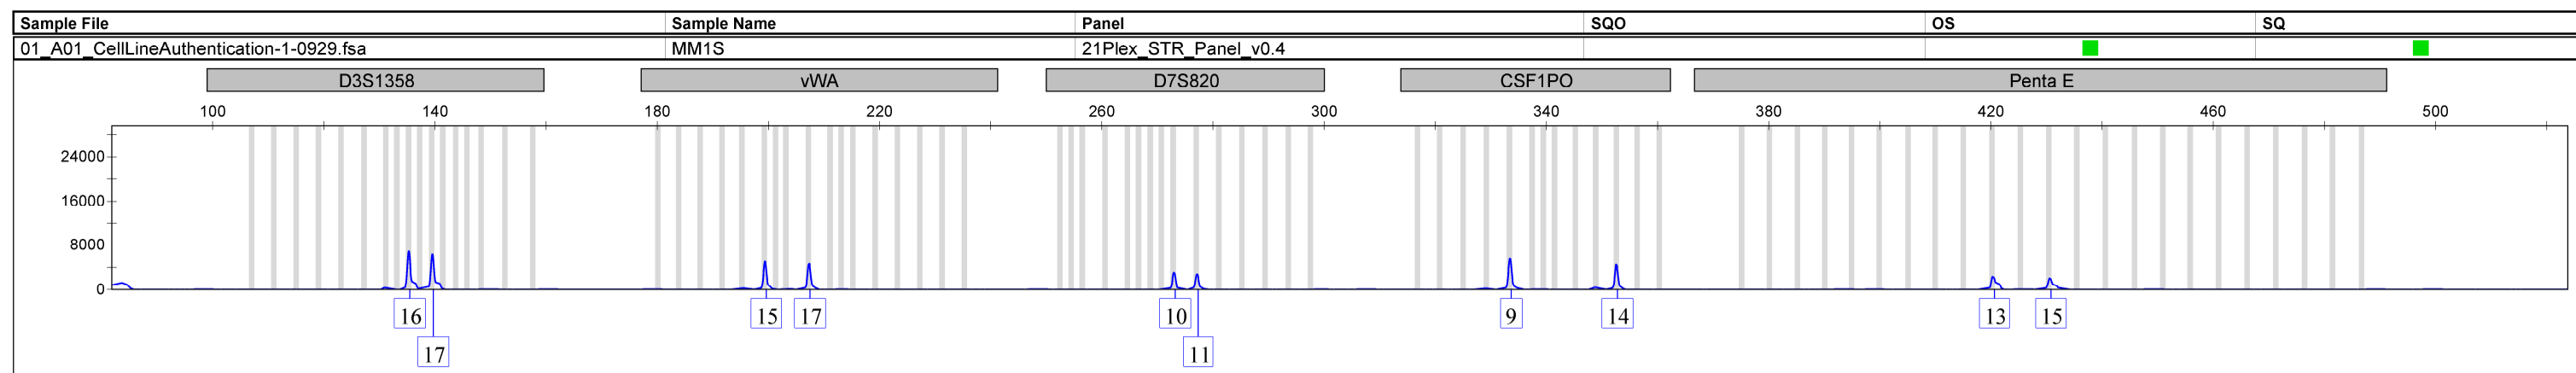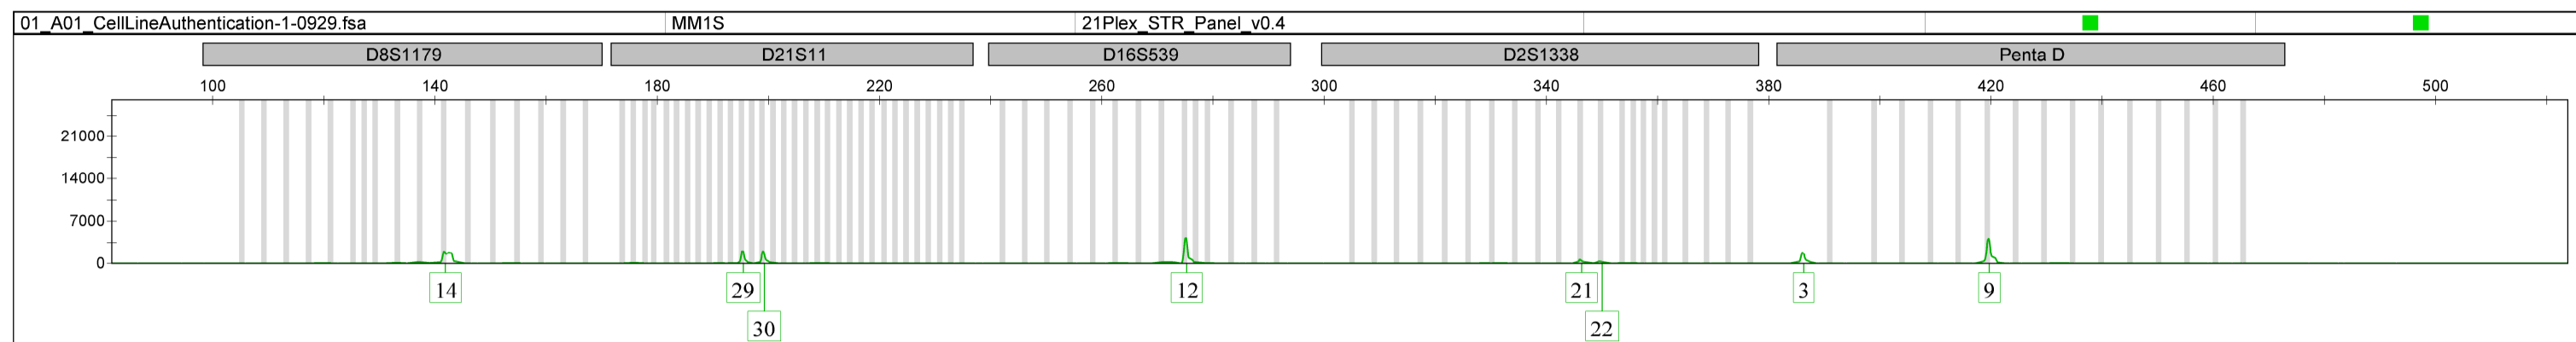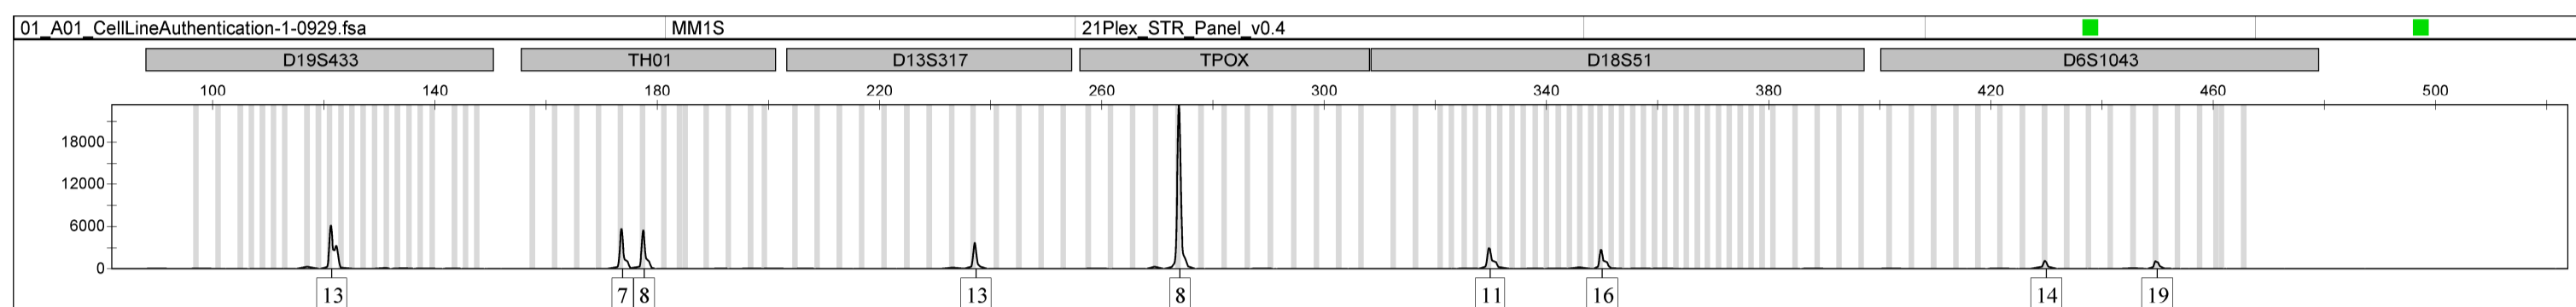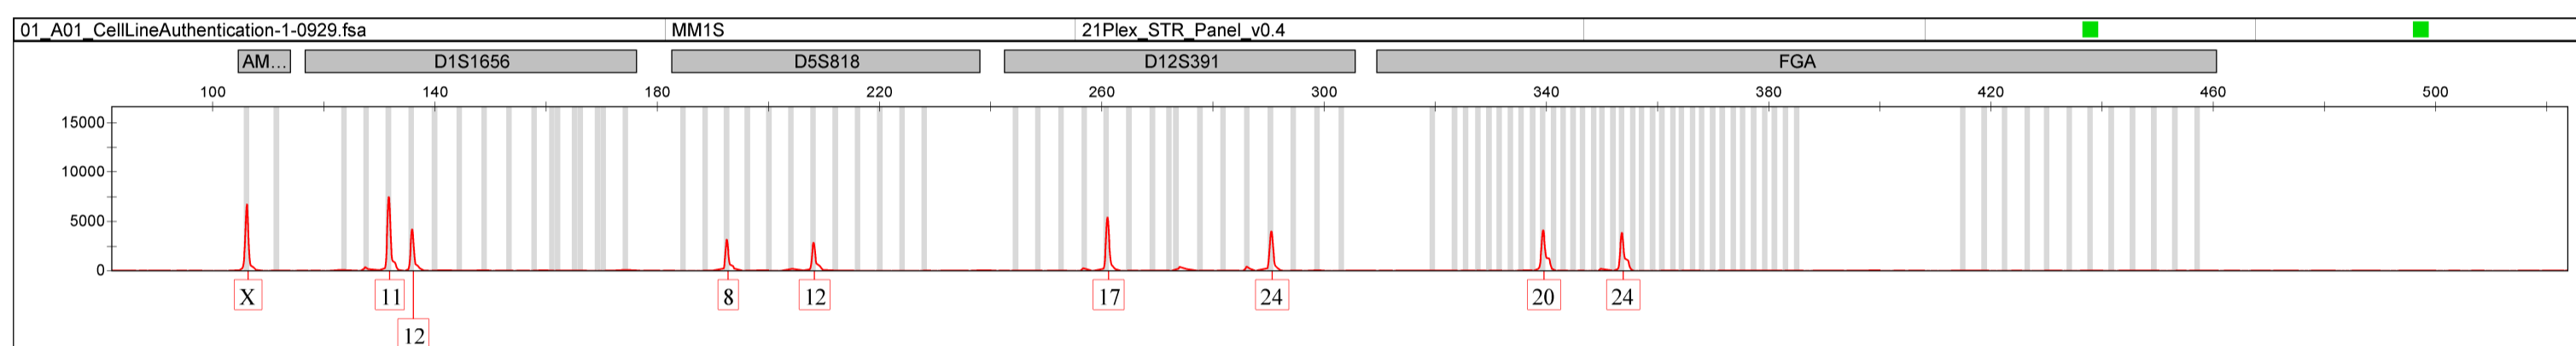

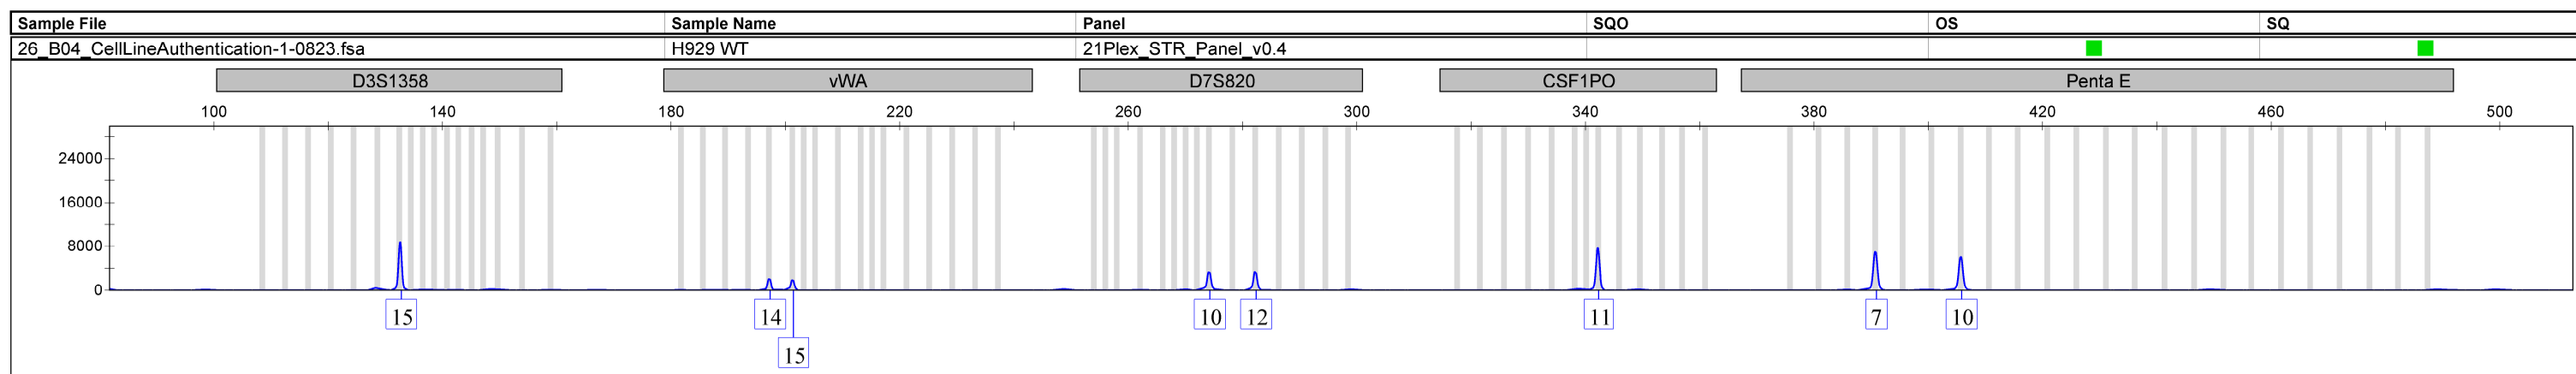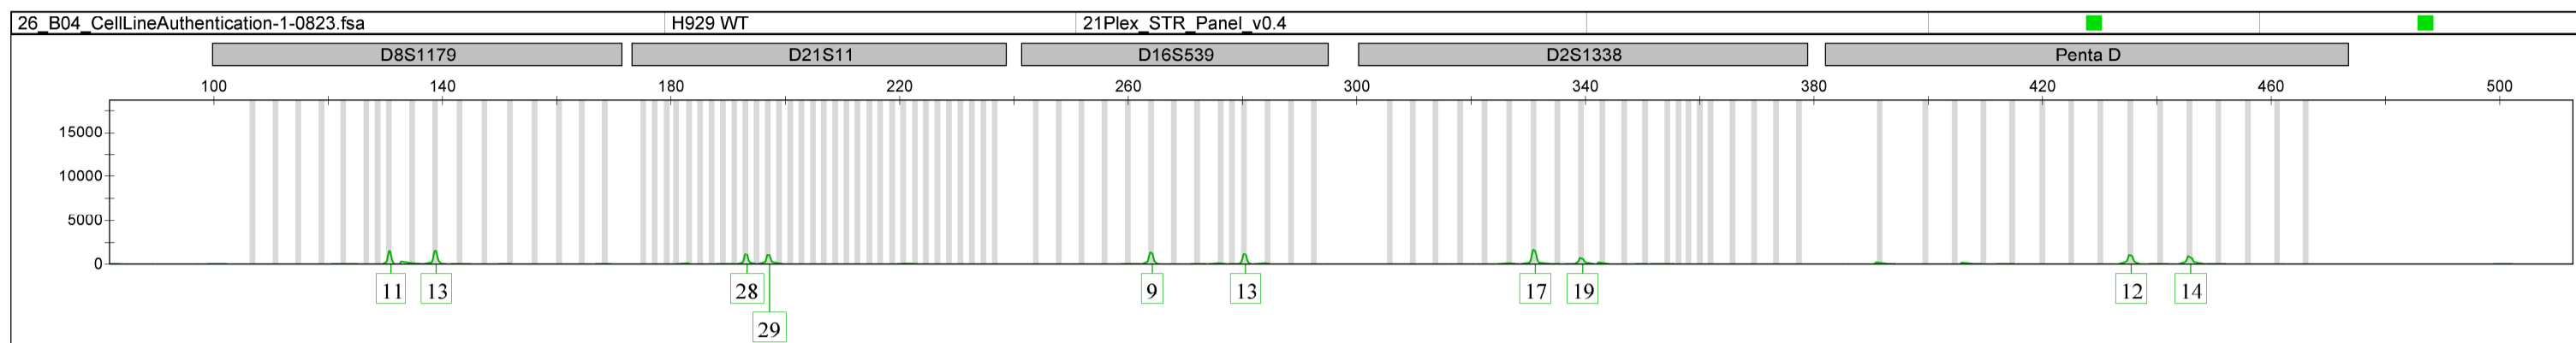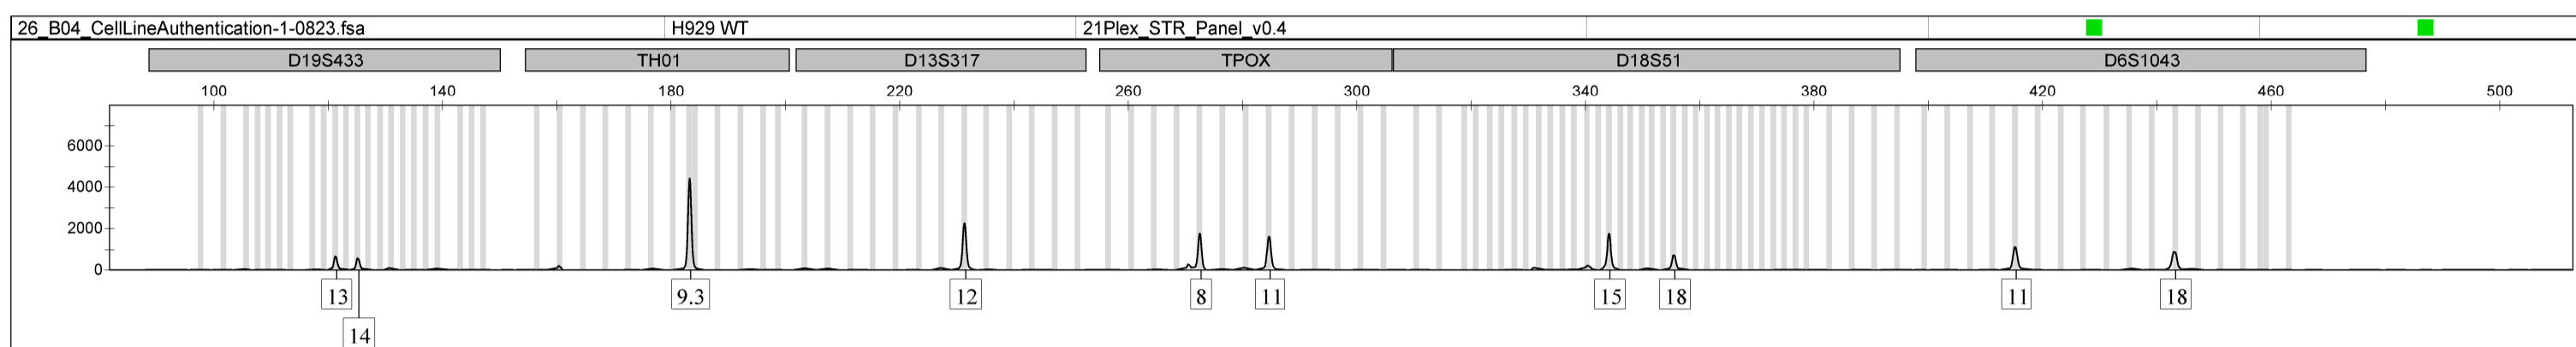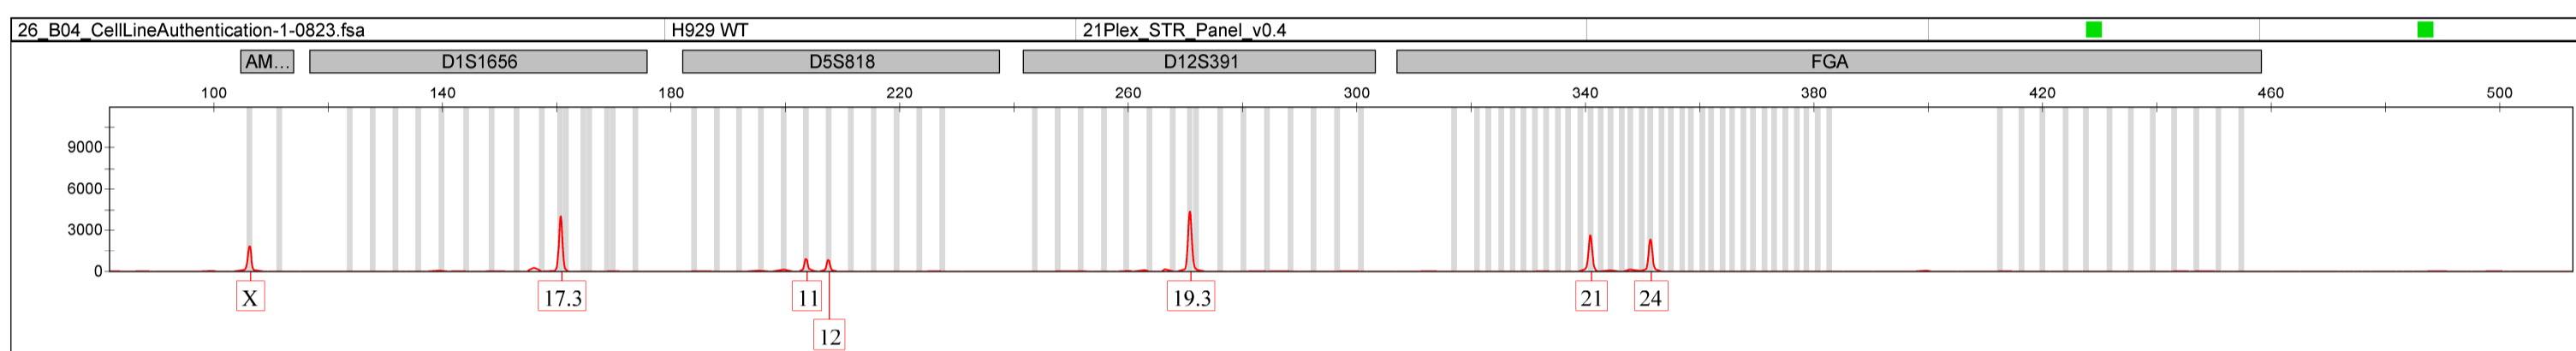



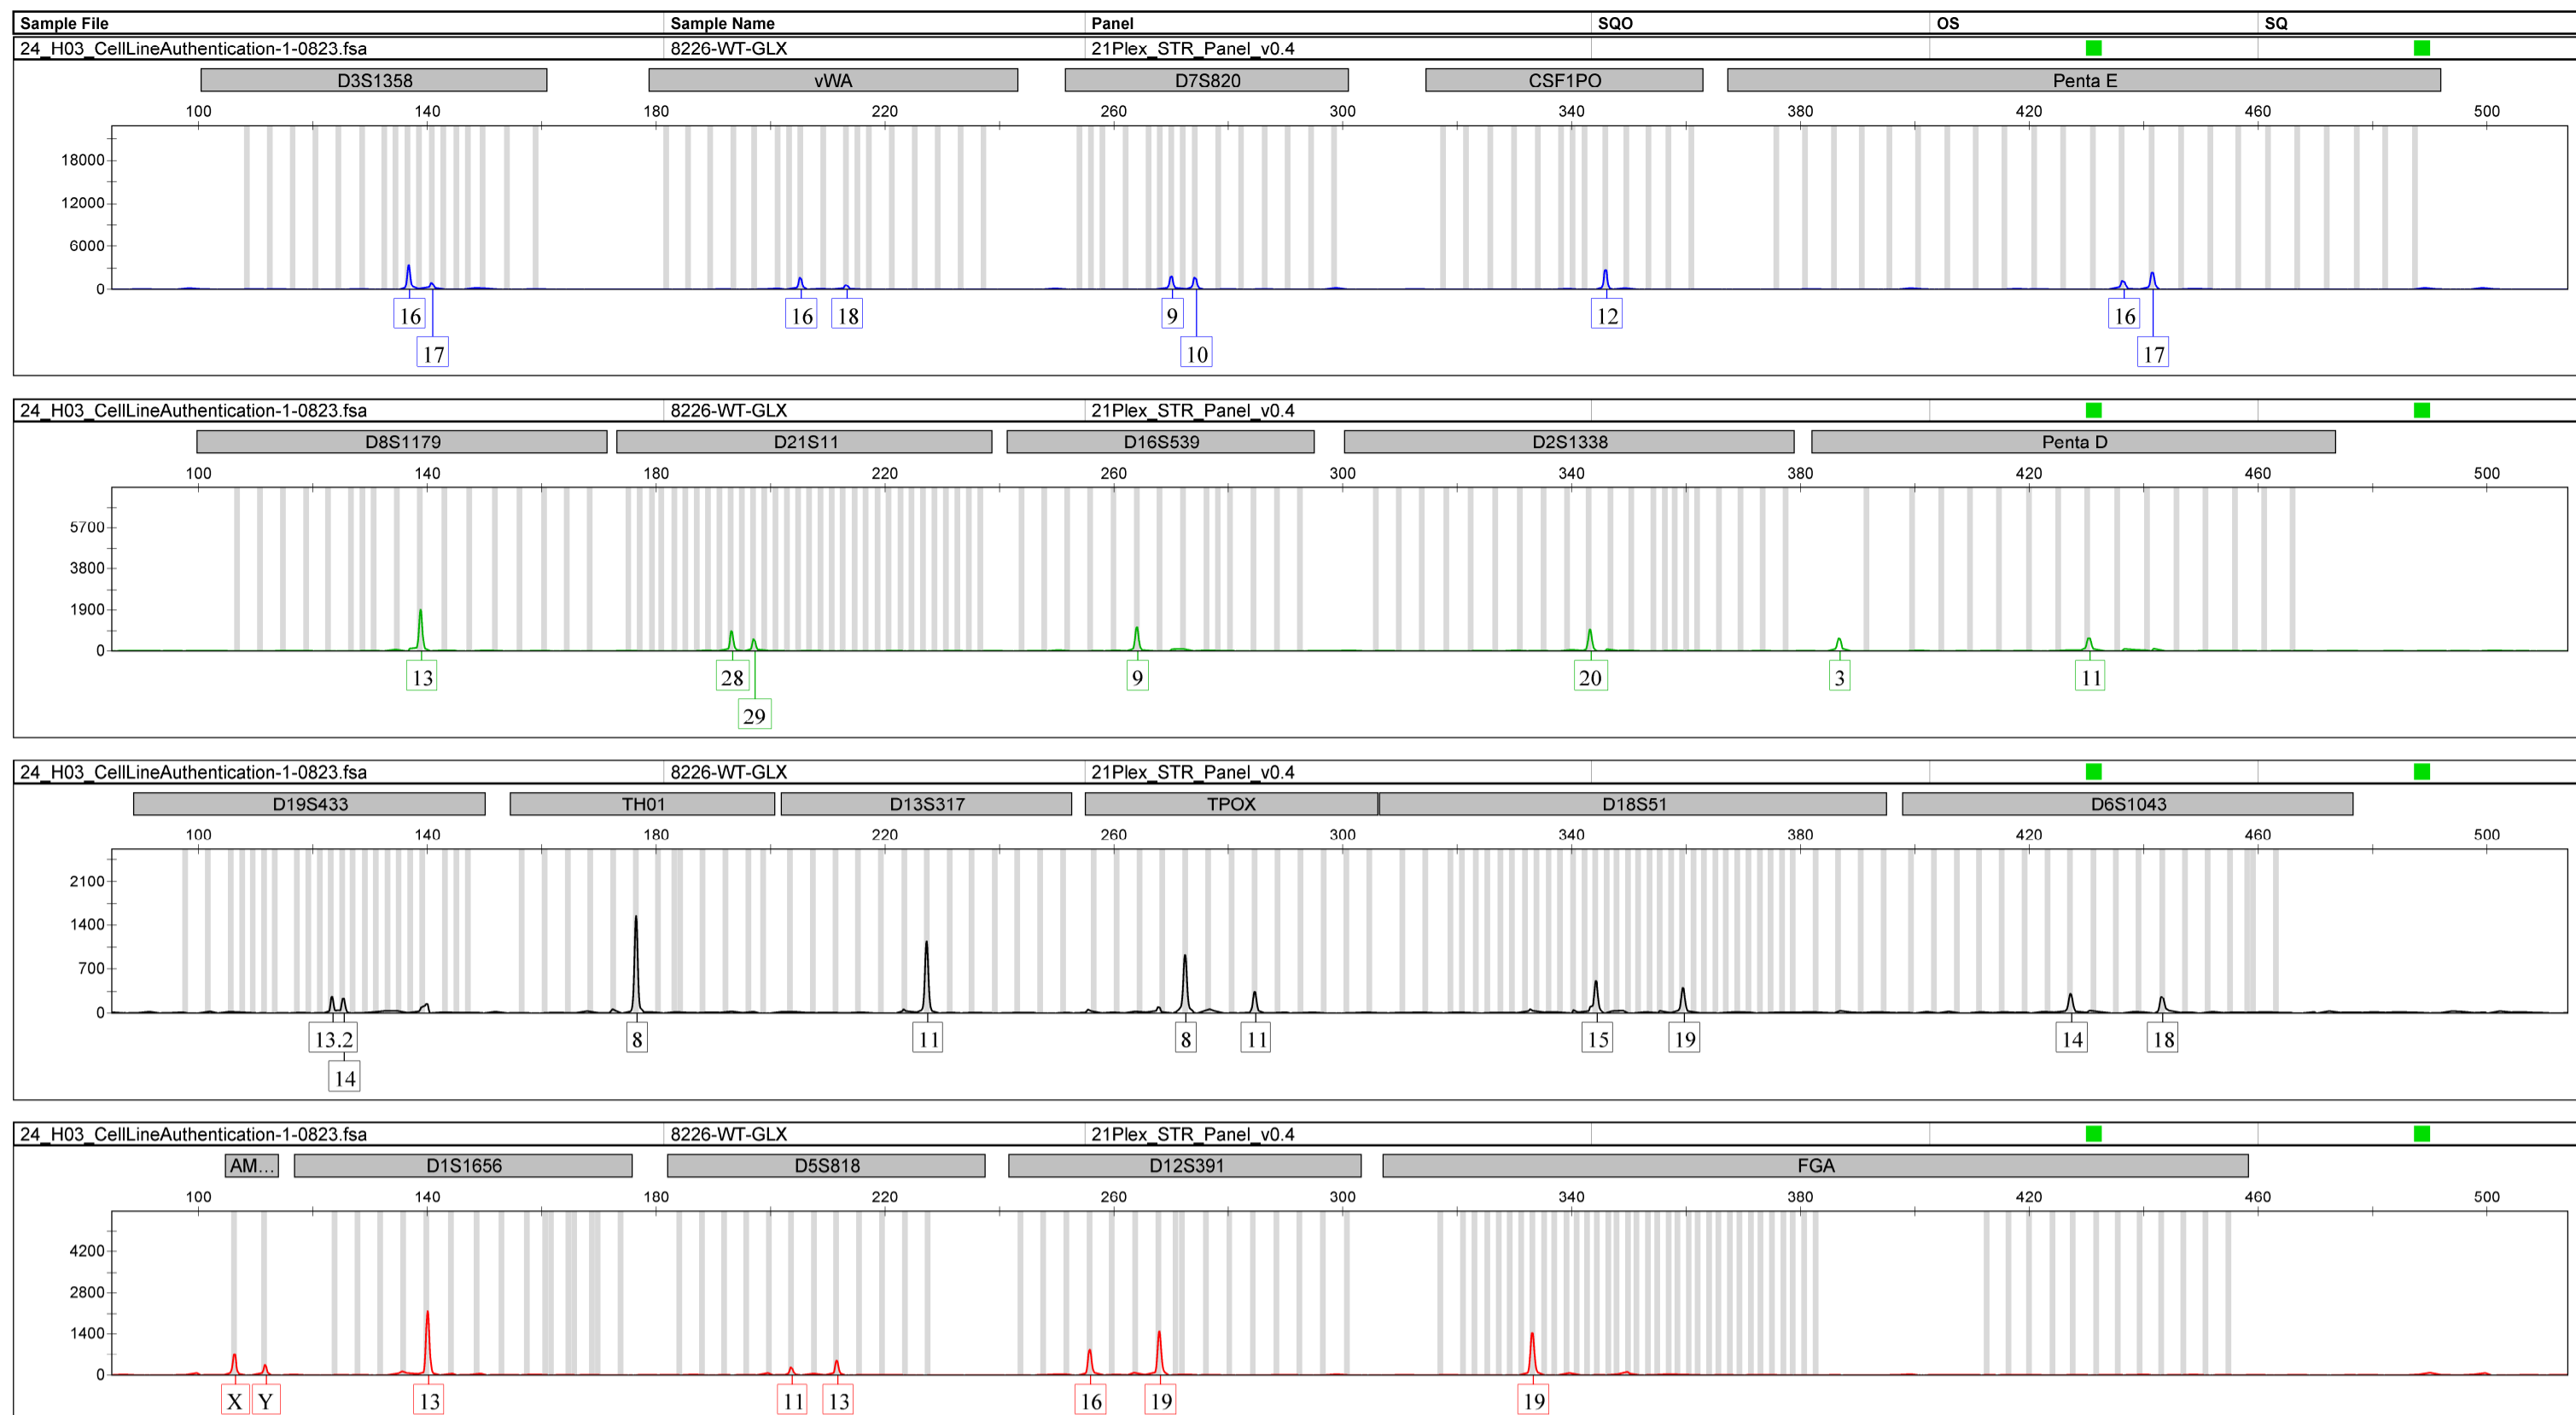

| Sample File                              | Sample Name | Panel                 | SQO | OS | SQ |
|------------------------------------------|-------------|-----------------------|-----|----|----|
| 16_H02_CellLineAuthentication-1-0907.fsa | U266        | 21Plex_STR_Panel_v1.1 |     | ■  | ■  |

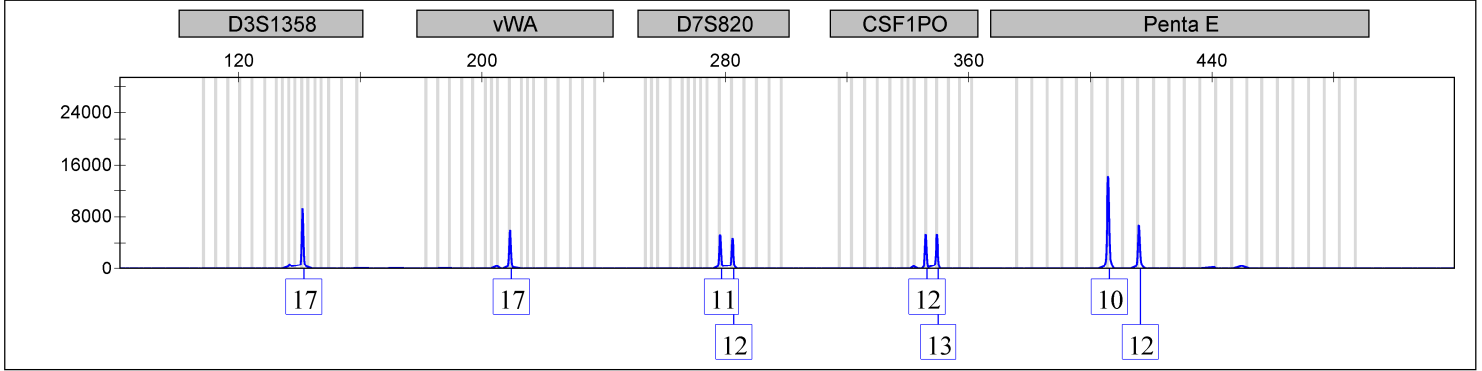

| Sample File                              | Sample Name | Panel                 | SQO | OS | SQ |
|------------------------------------------|-------------|-----------------------|-----|----|----|
| 16_H02_CellLineAuthentication-1-0907.fsa | U266        | 21Plex_STR_Panel_v1.1 |     | ■  | ■  |

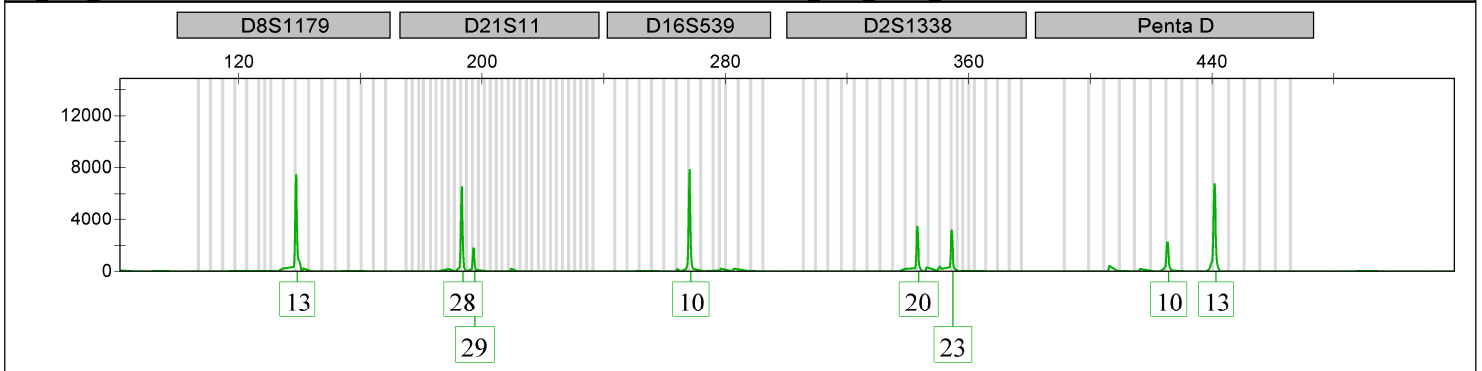

| Sample File                              | Sample Name | Panel                 | SQO | OS | SQ |
|------------------------------------------|-------------|-----------------------|-----|----|----|
| 16_H02_CellLineAuthentication-1-0907.fsa | U266        | 21Plex_STR_Panel_v1.1 |     | ■  | ■  |

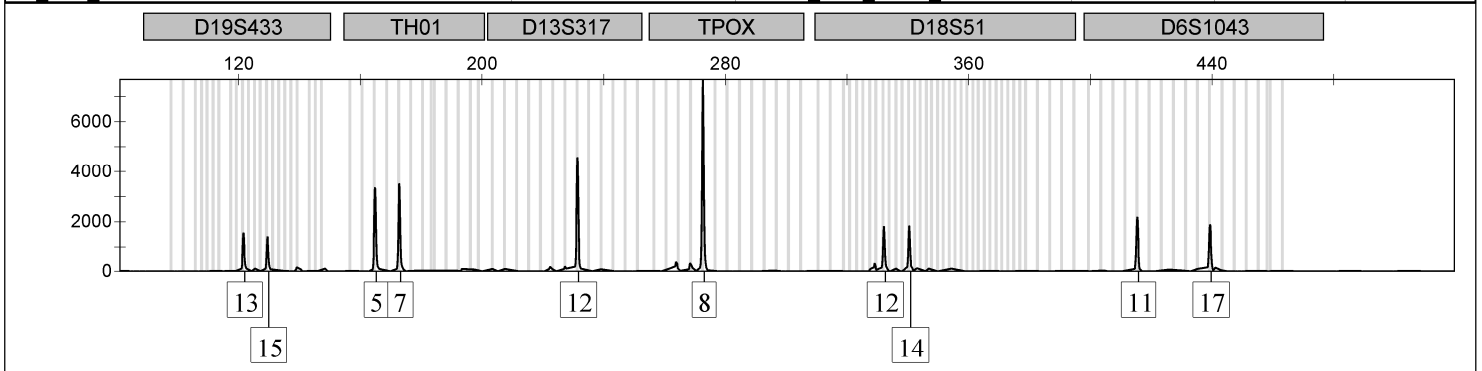

| Sample File                              | Sample Name | Panel                 | SQO | OS | SQ |
|------------------------------------------|-------------|-----------------------|-----|----|----|
| 16_H02_CellLineAuthentication-1-0907.fsa | U266        | 21Plex_STR_Panel_v1.1 |     | ■  | ■  |

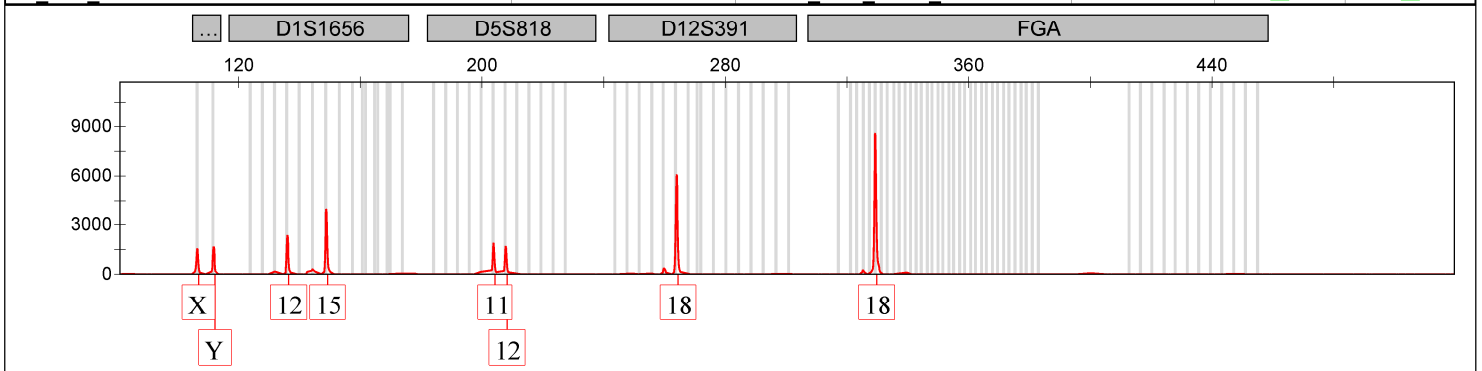

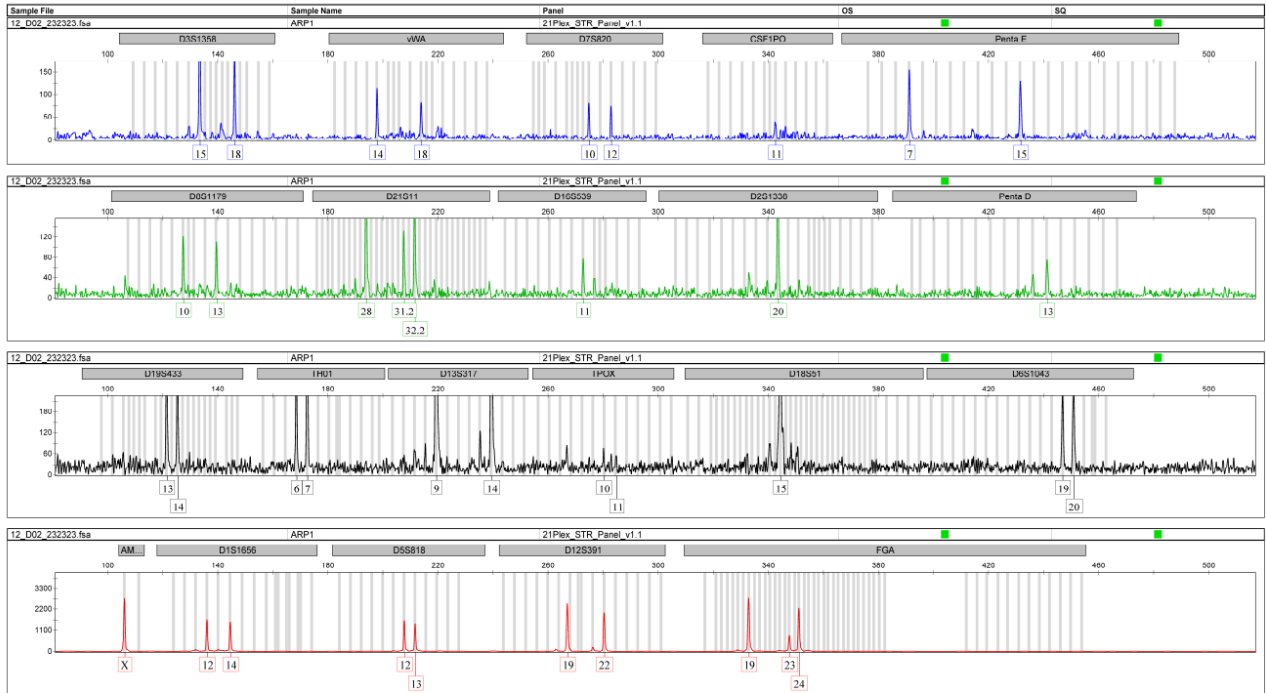

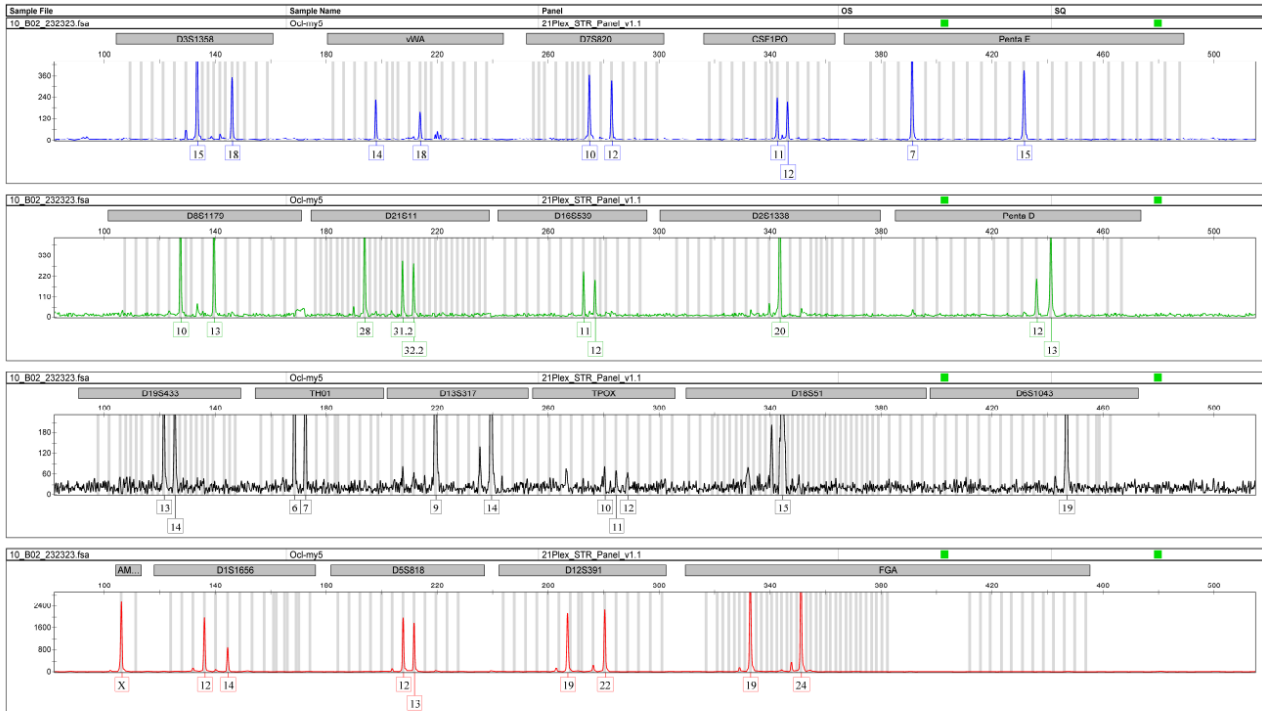

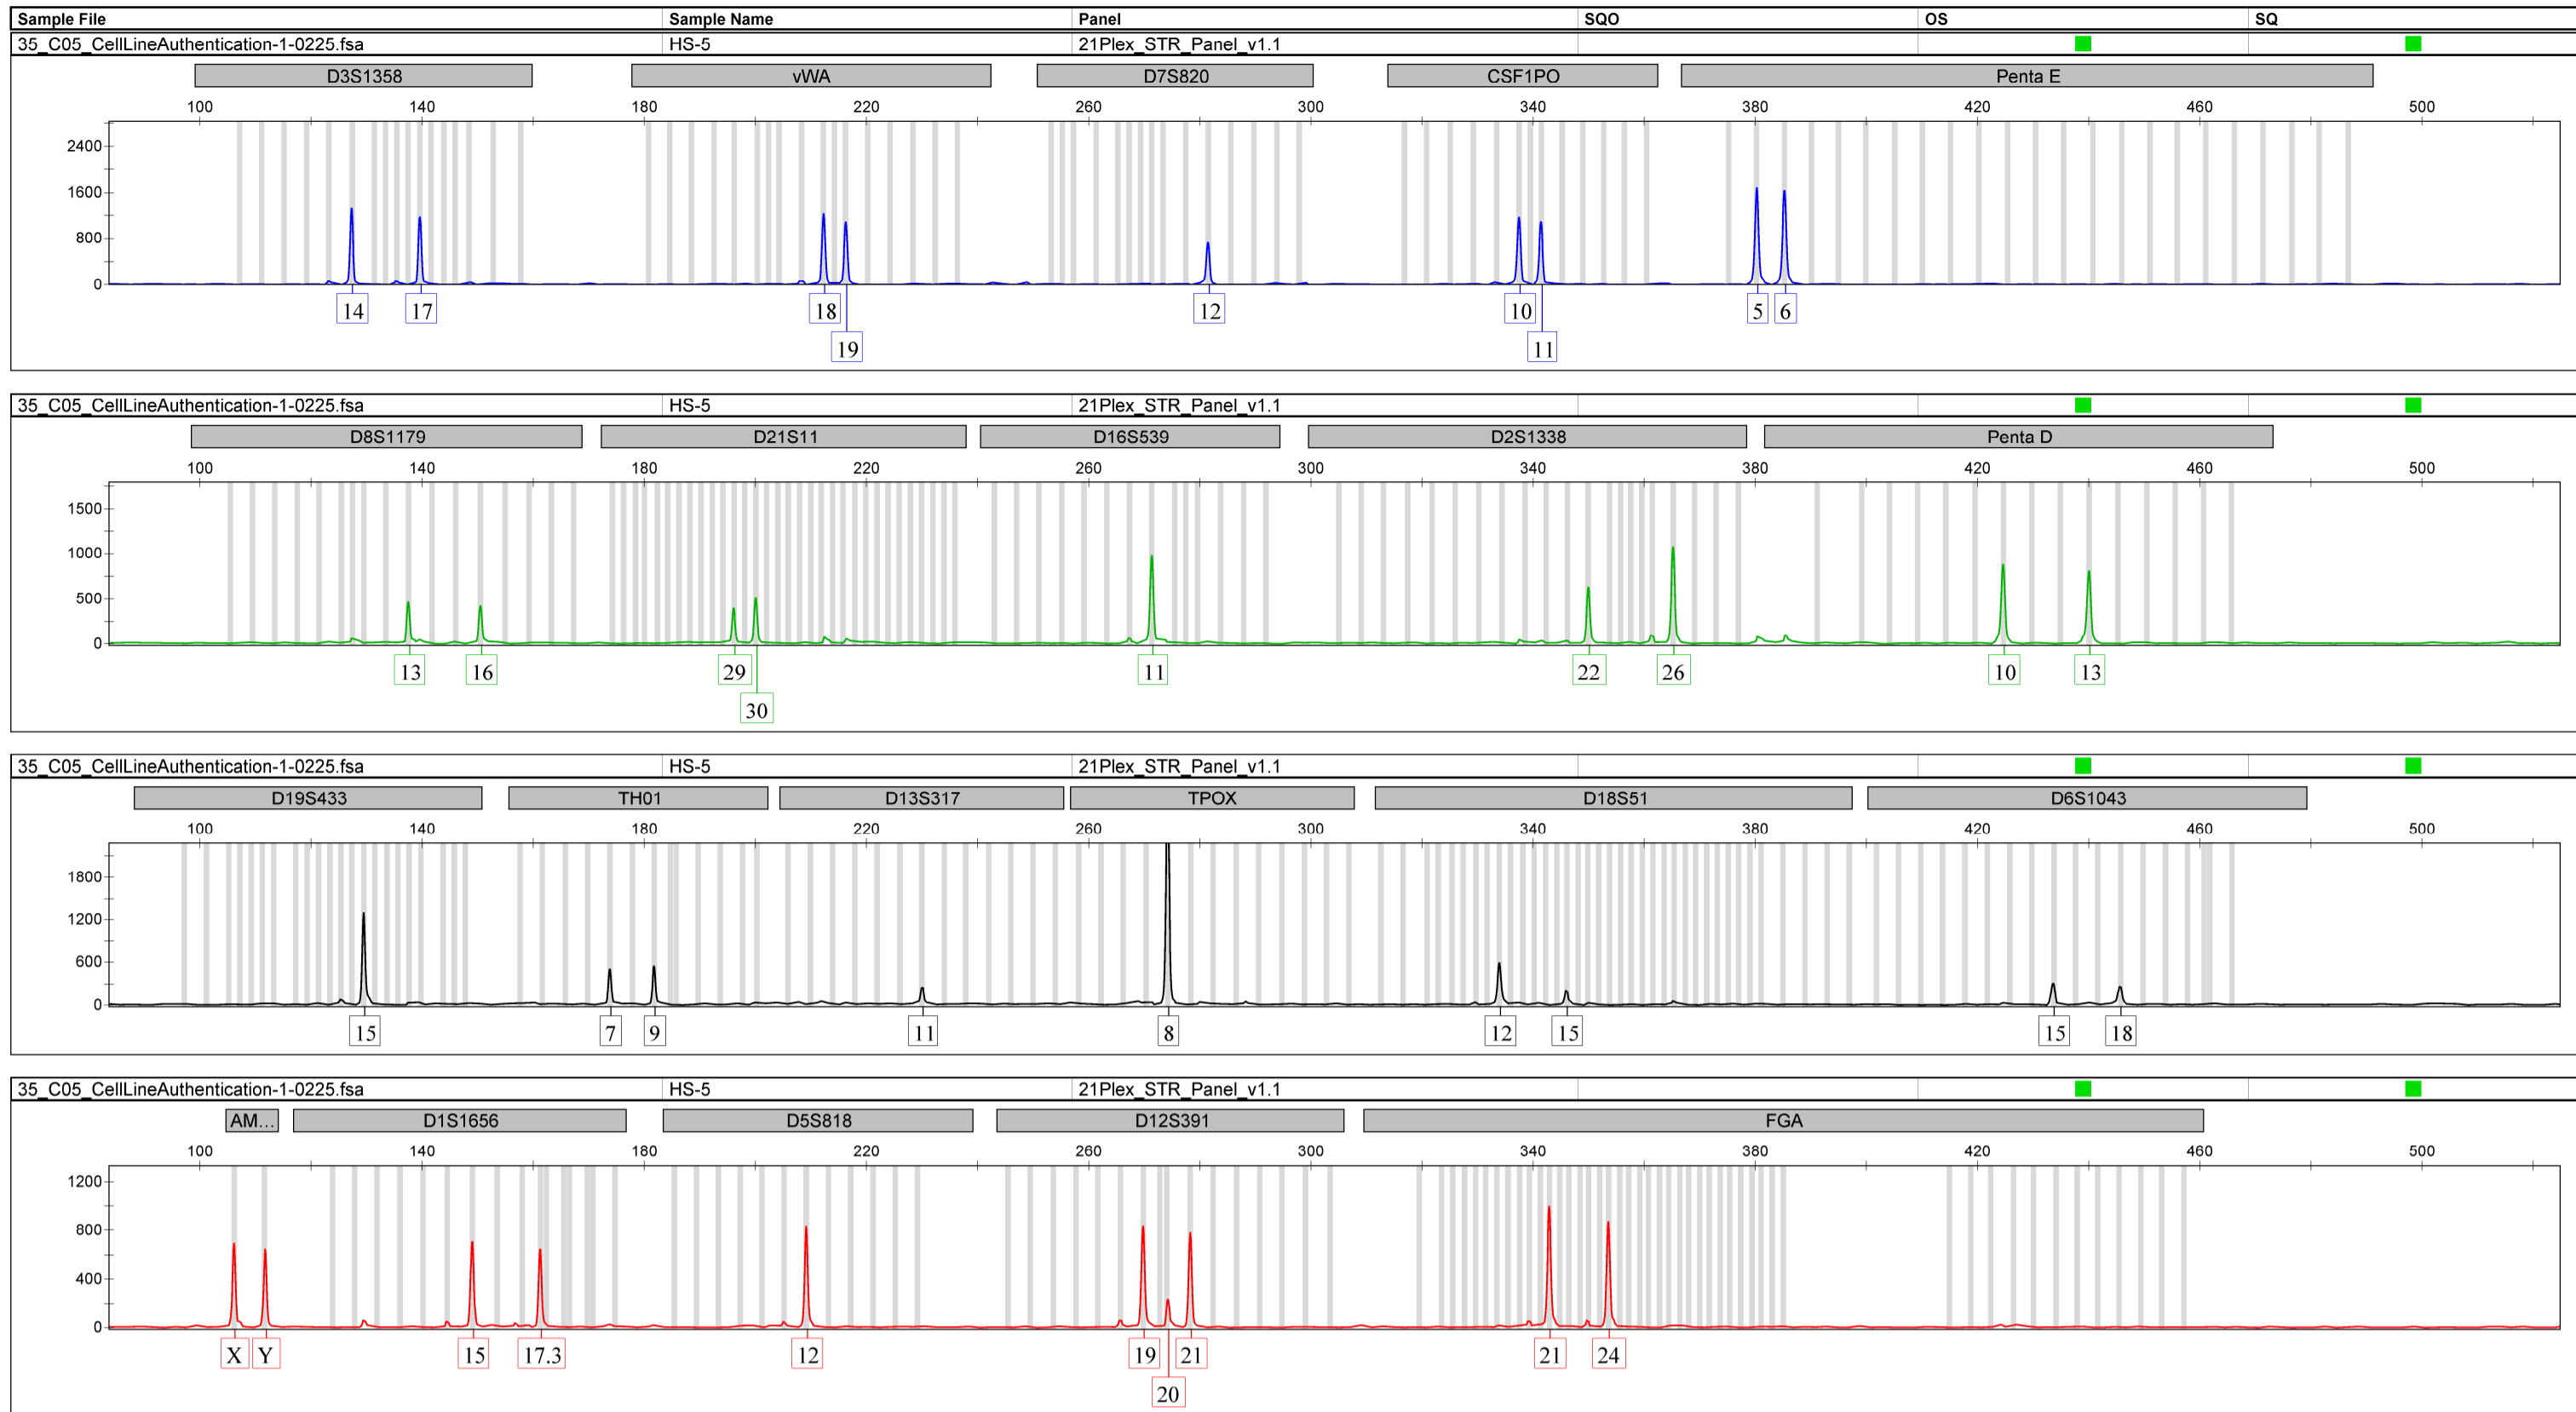

Supplement: mmc4.pdf [file mmc4.pdf]
