# Supplementary material for: Indirubin-3’-monoxime acts as proteasome inhibitor: Therapeutic application in multiple myeloma
Source: PubMed Central journal article supplement — eBioMedicine. 2022 Mar 26;78:103950. doi: 10.1016/j.ebiom.2022.103950 (PMC8958548; doi:10.1016/j.ebiom.2022.103950), 2022-03-26

# Figure 2c

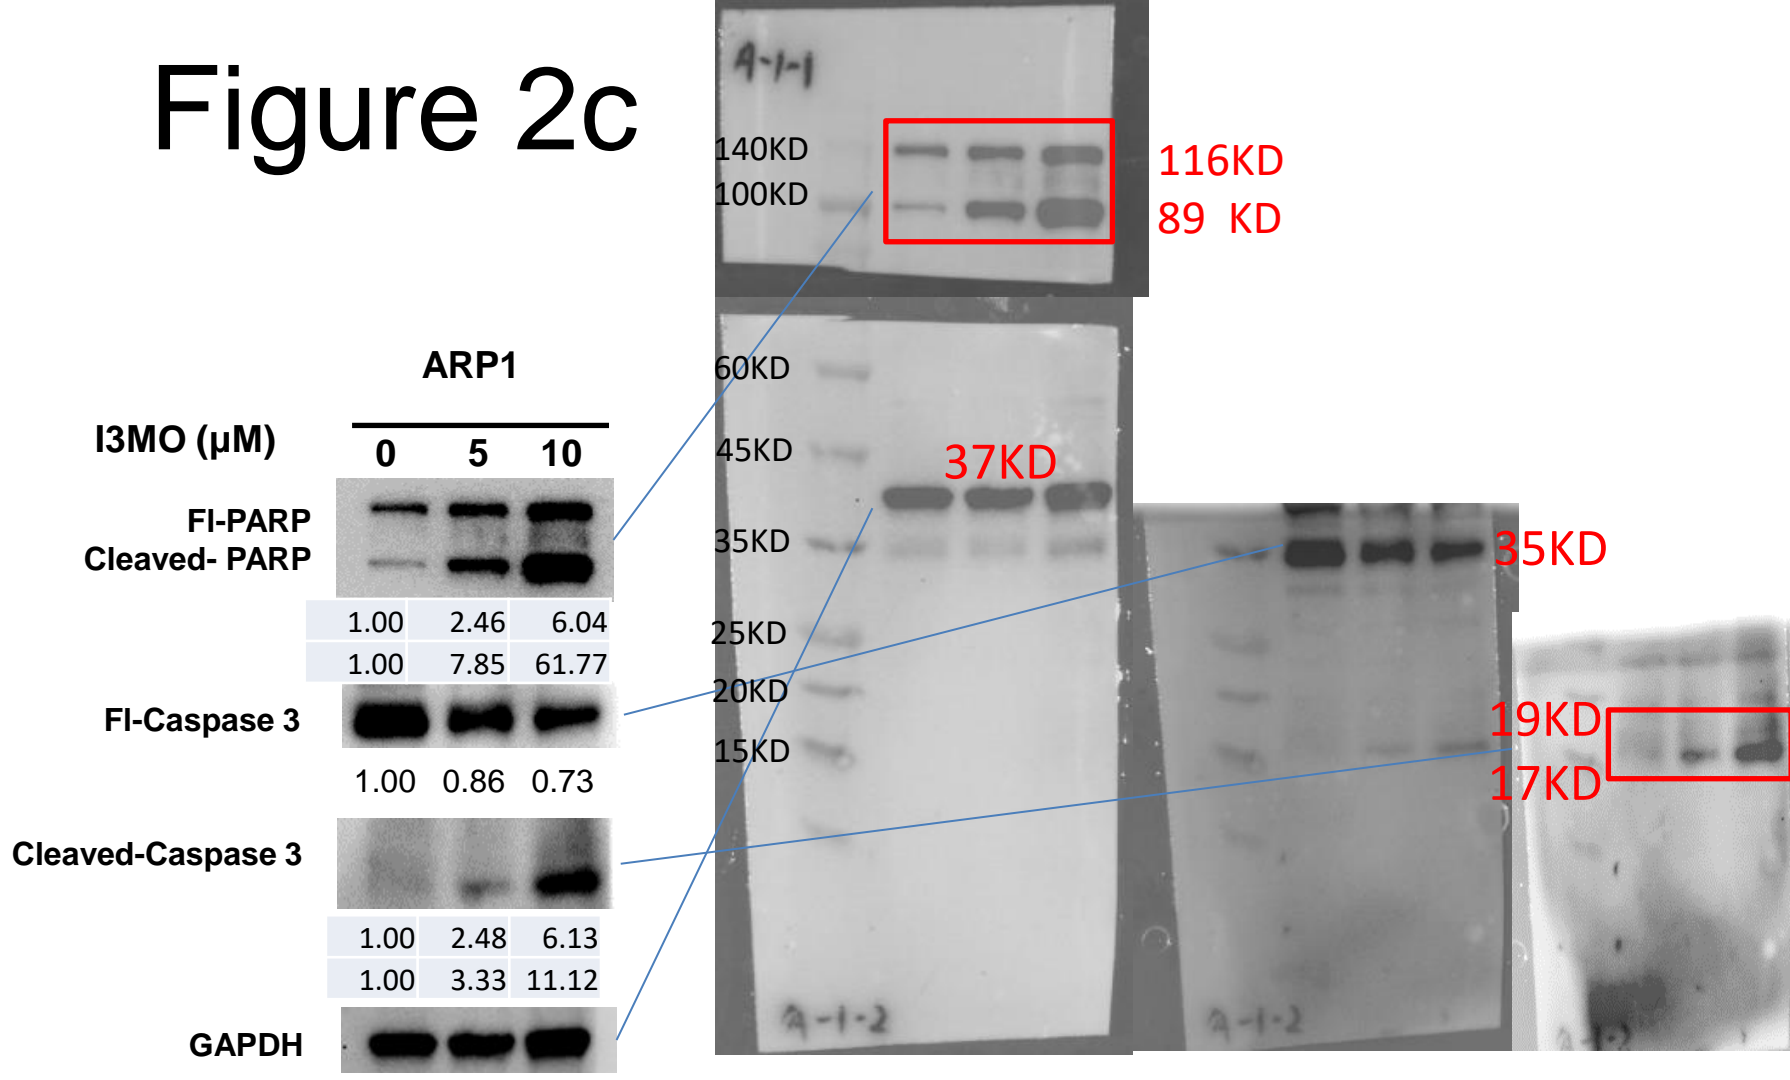

# Figure 2c

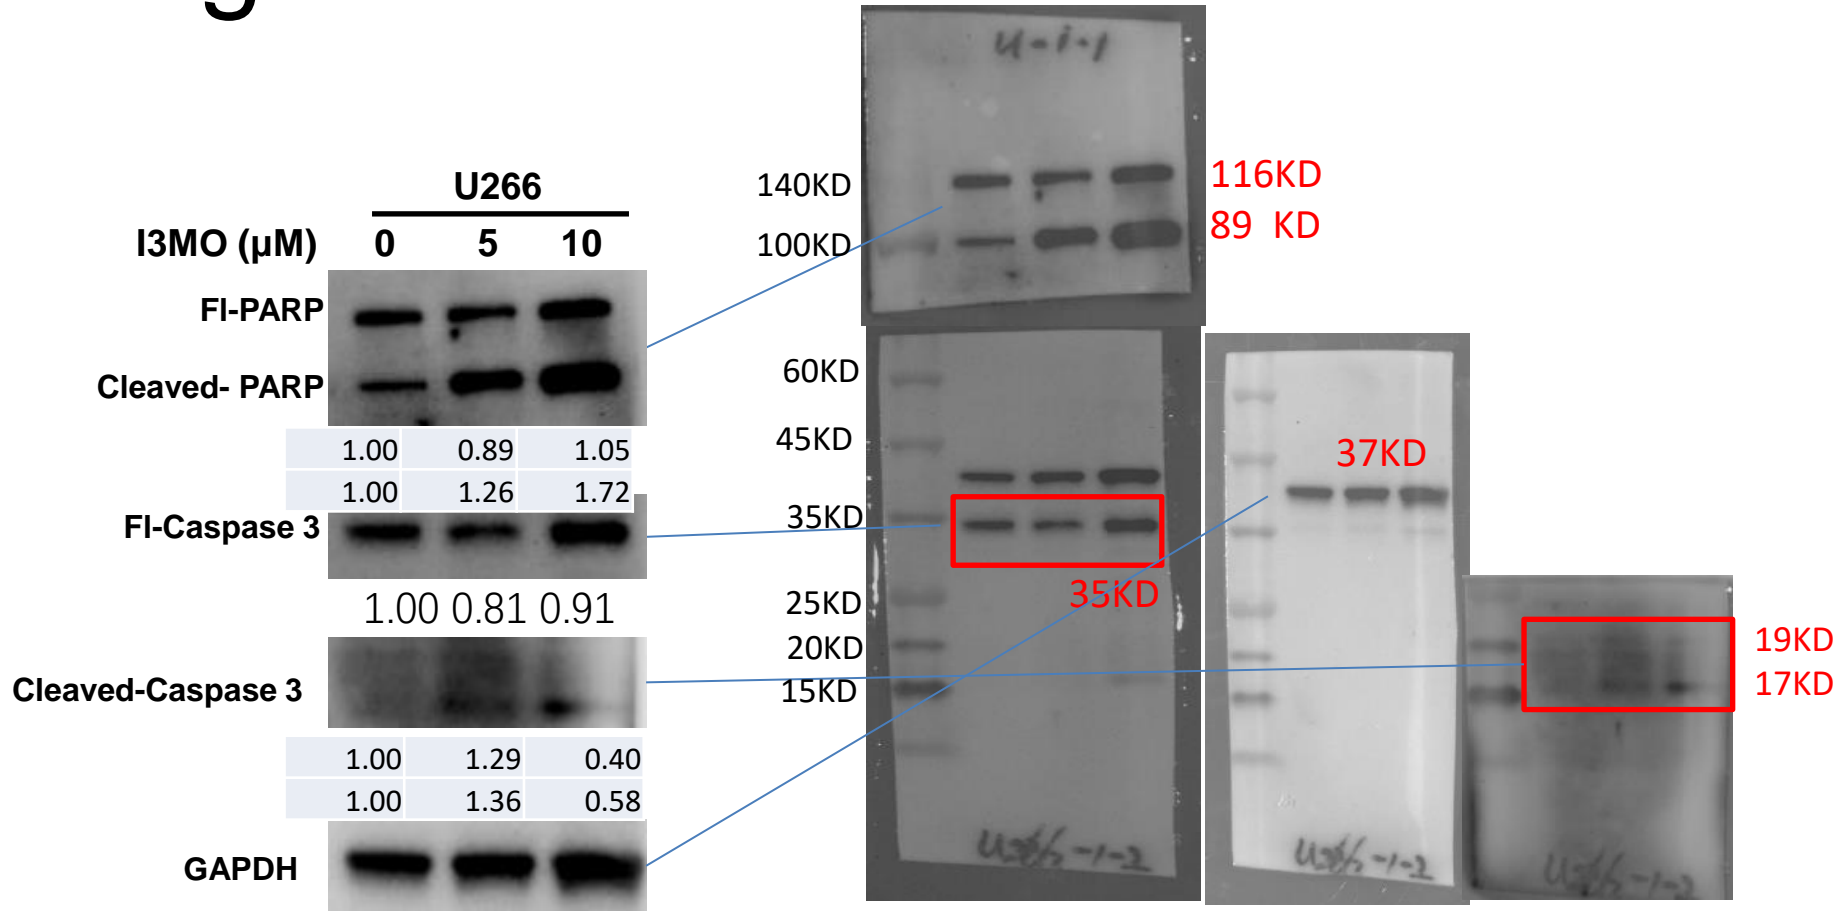

# Figure 2c

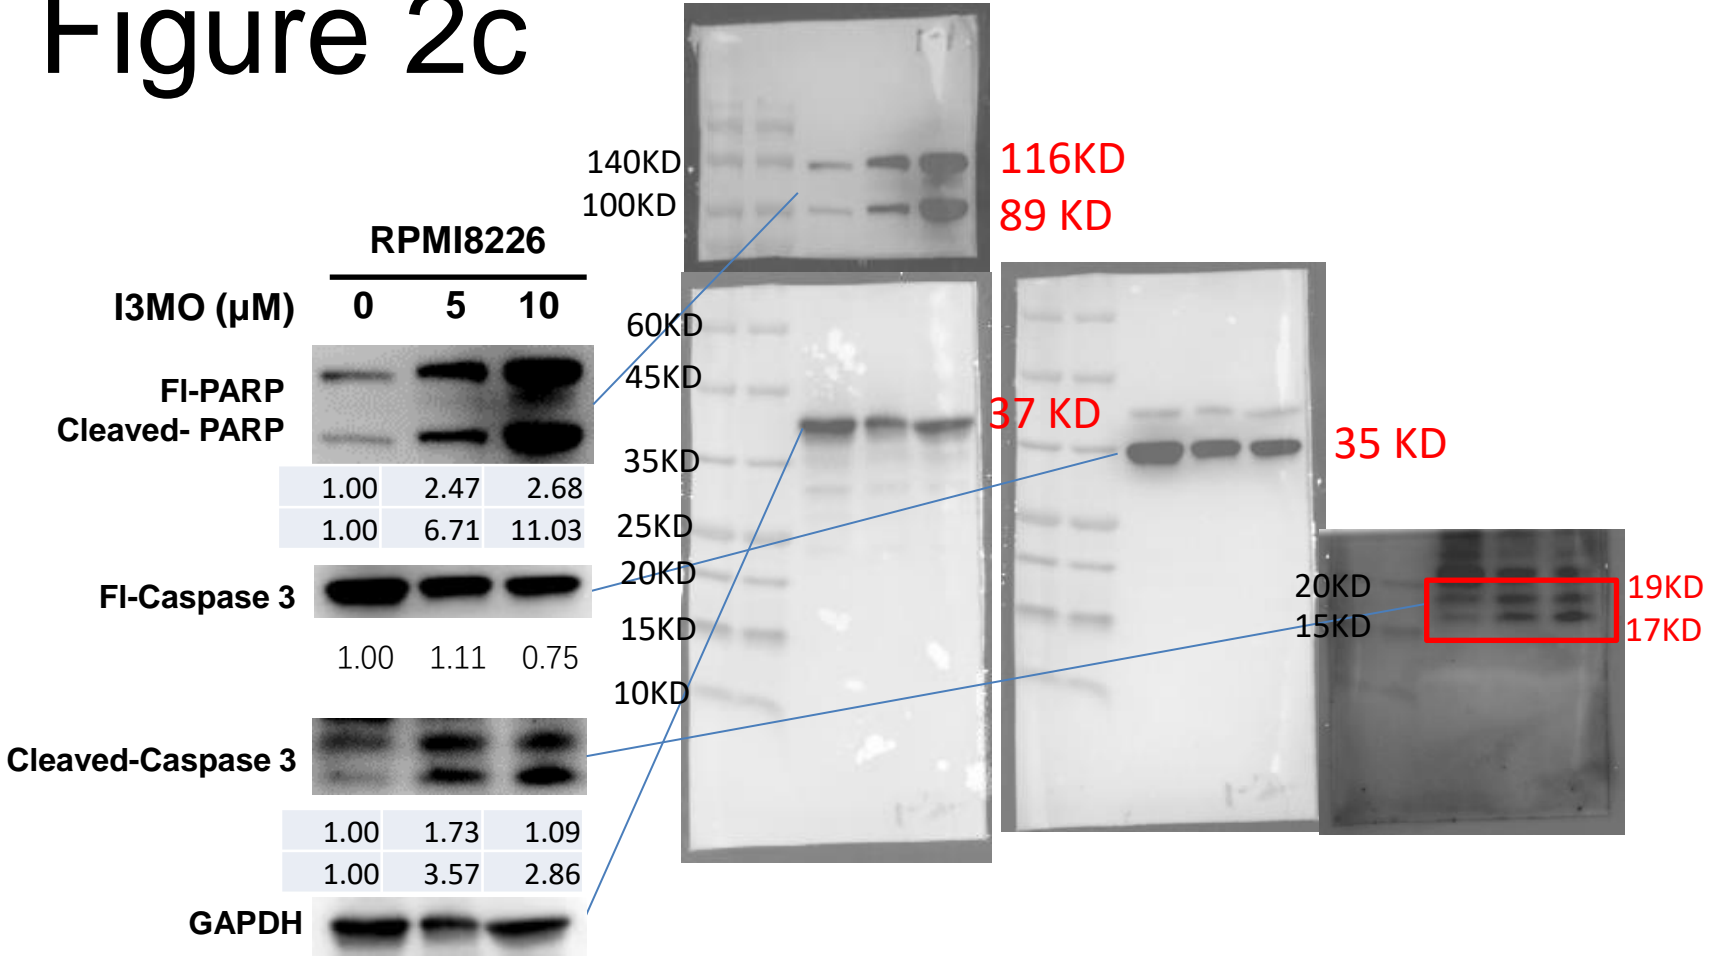

# Figure 2c

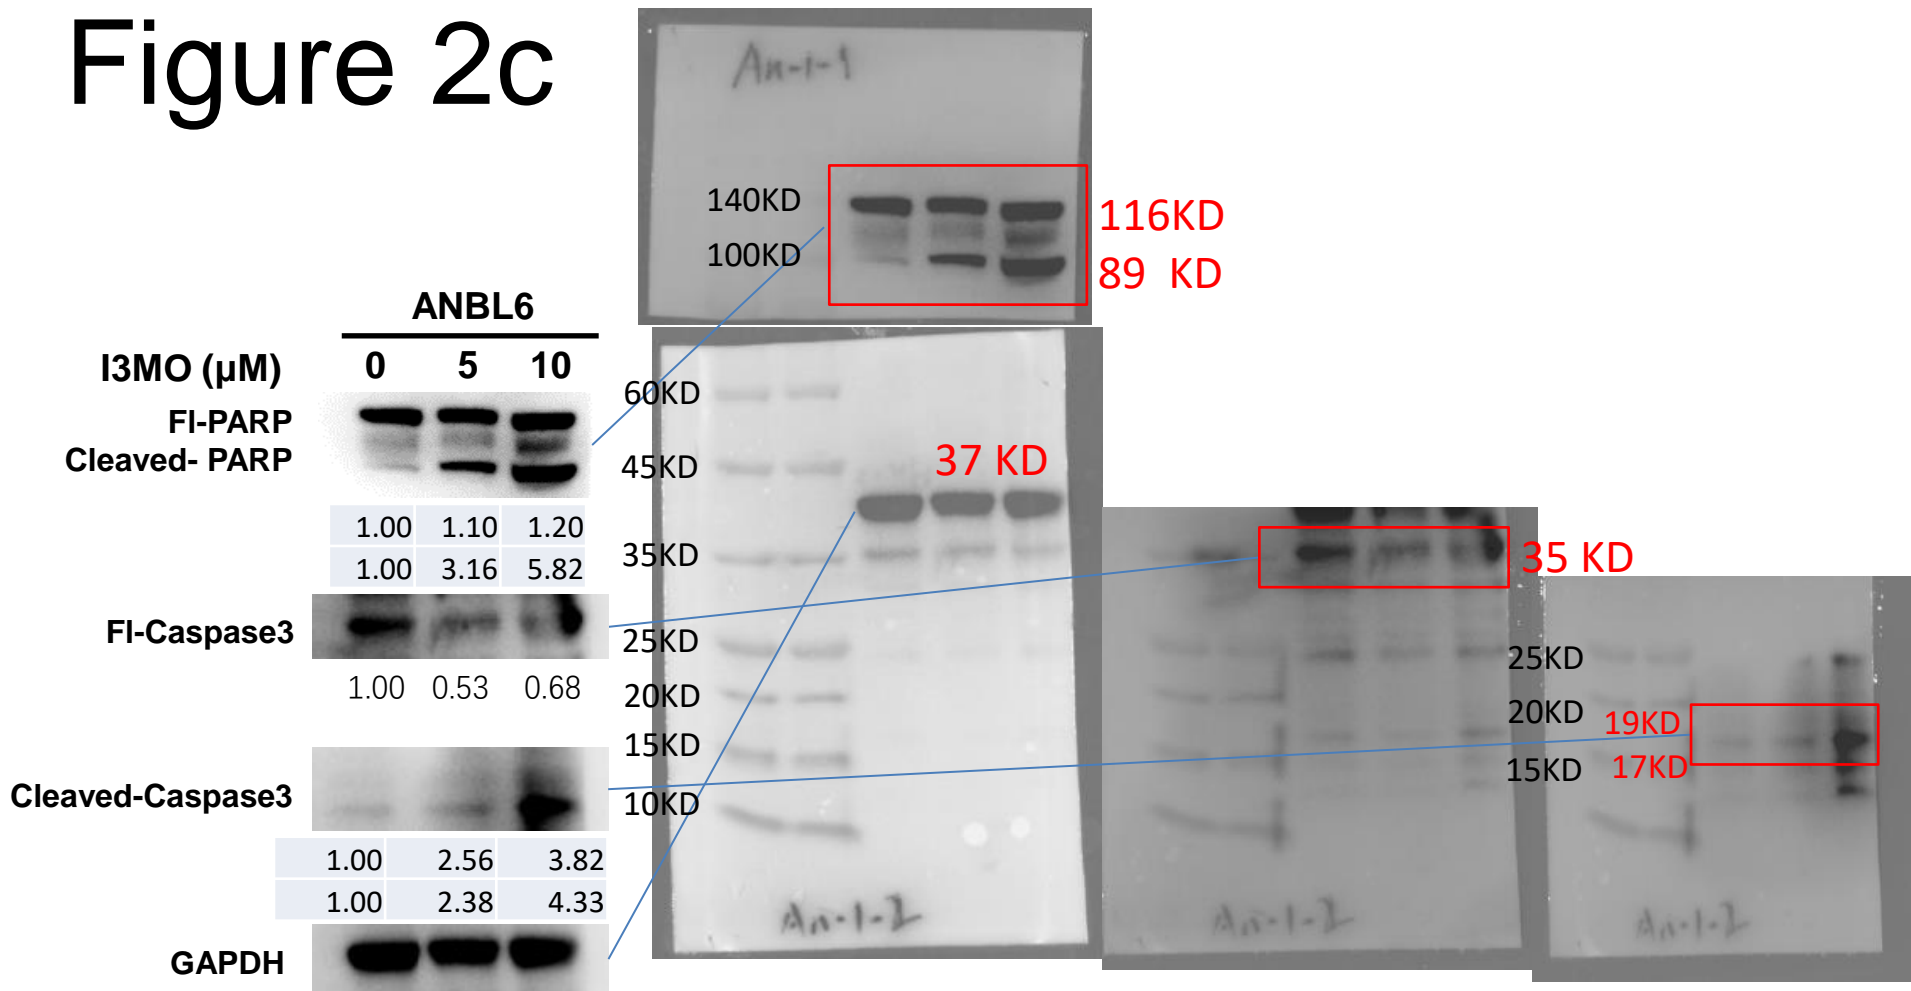

# Figure 2c

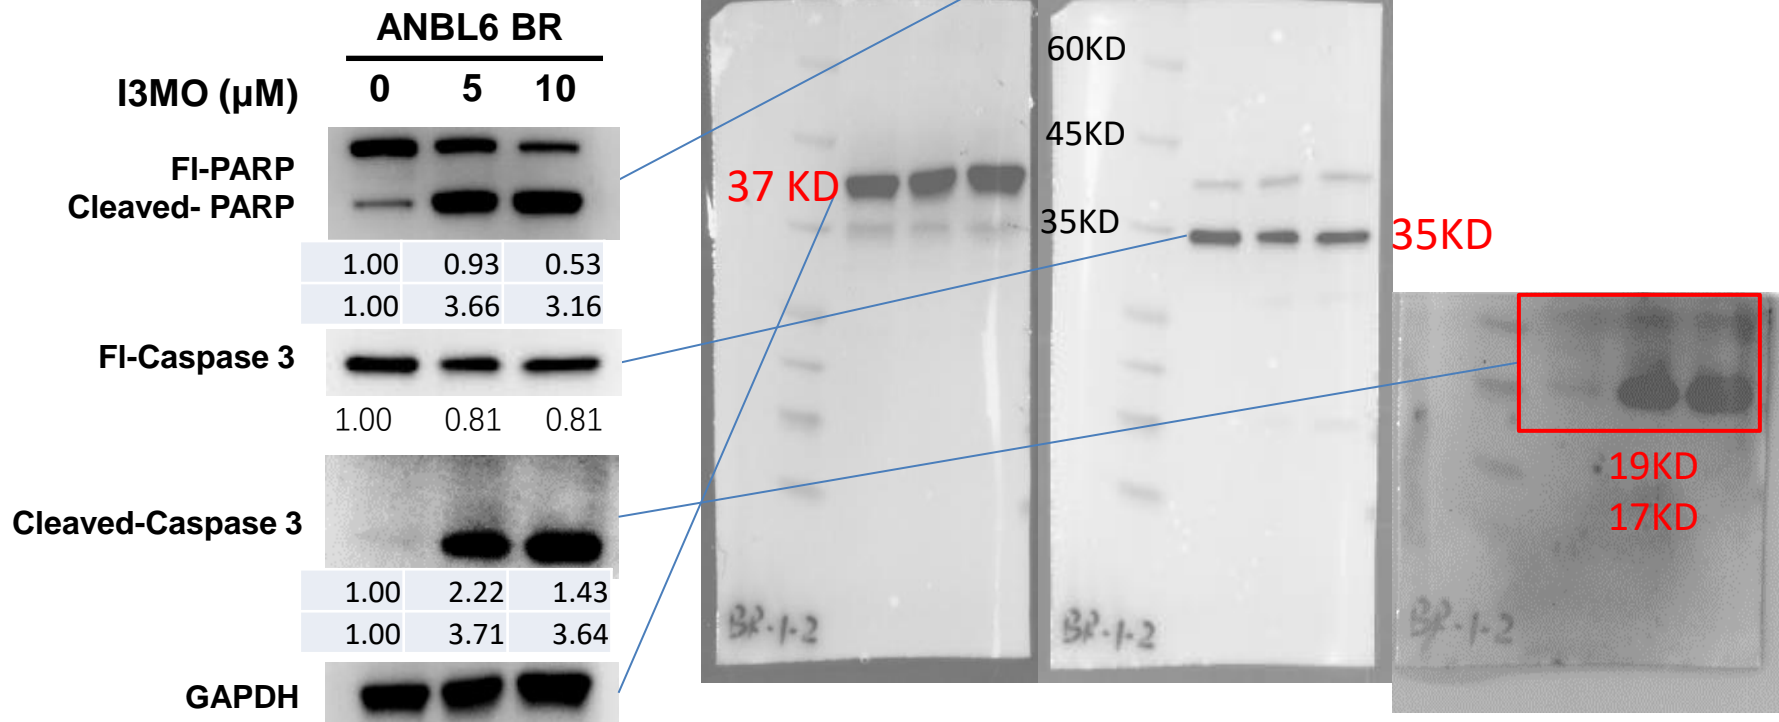

# Figure 5a

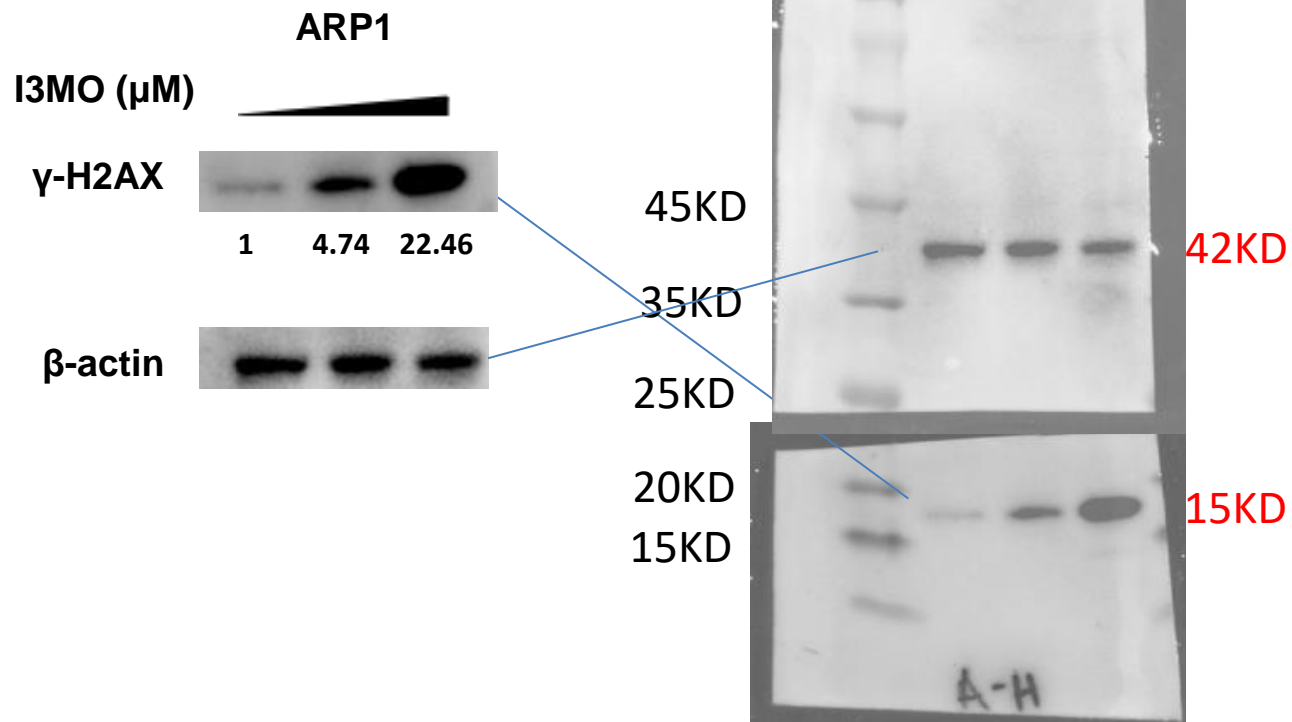

# Figure 5a

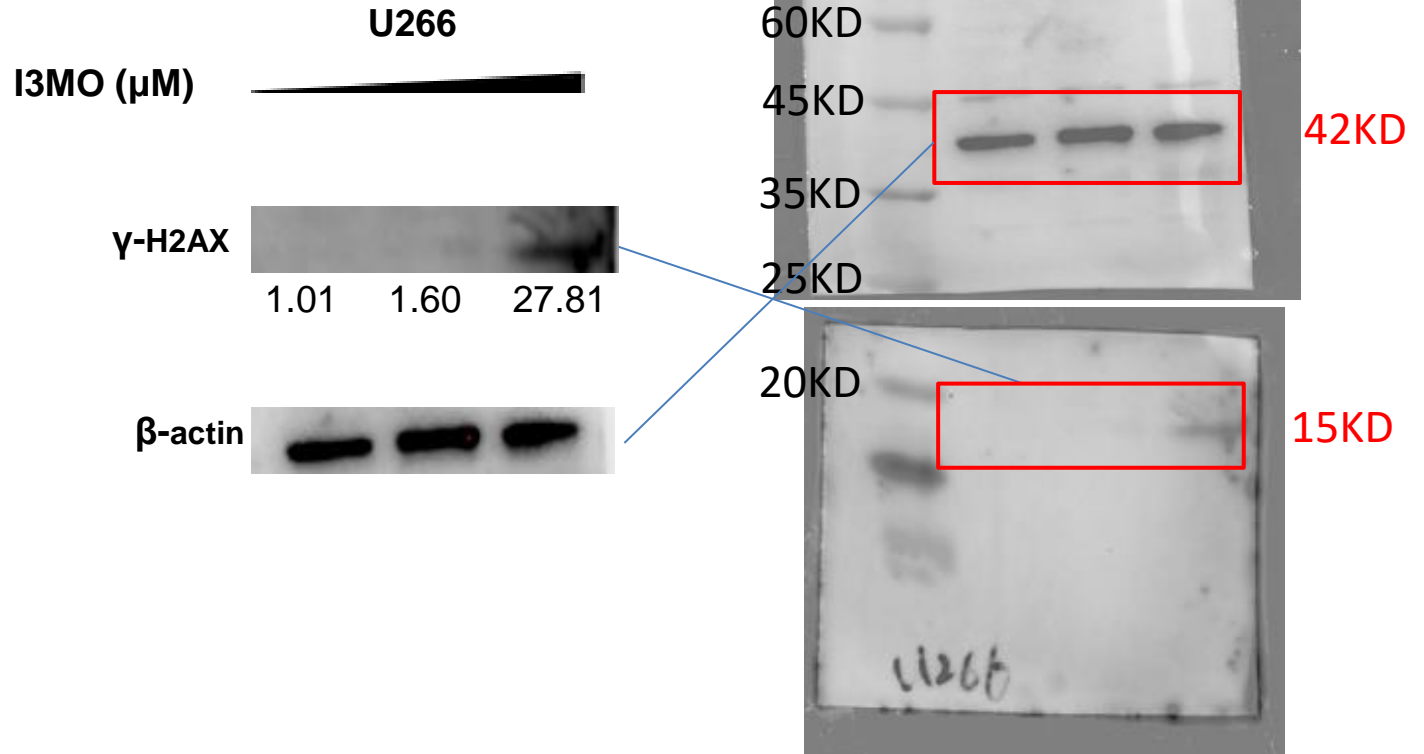

# Figure 5a

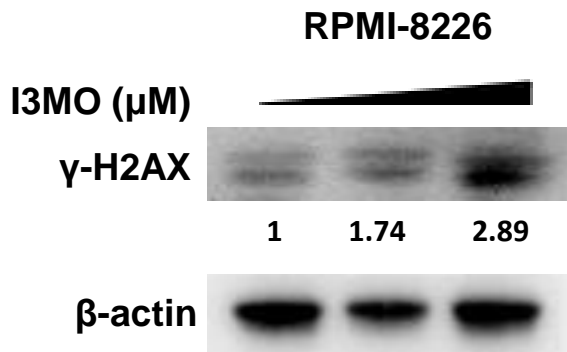

45KD  
35KD  
25KD  
20KD  
15KD

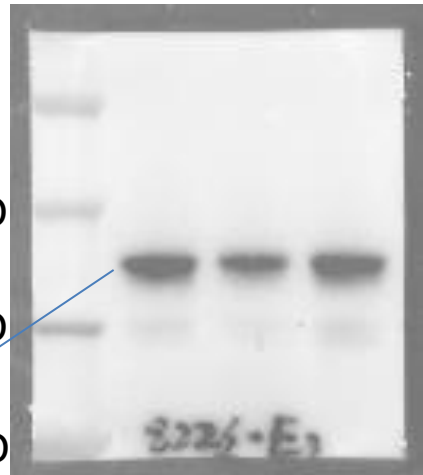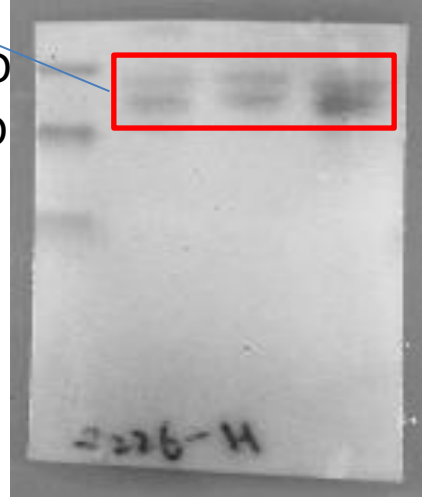



# Figure 5a

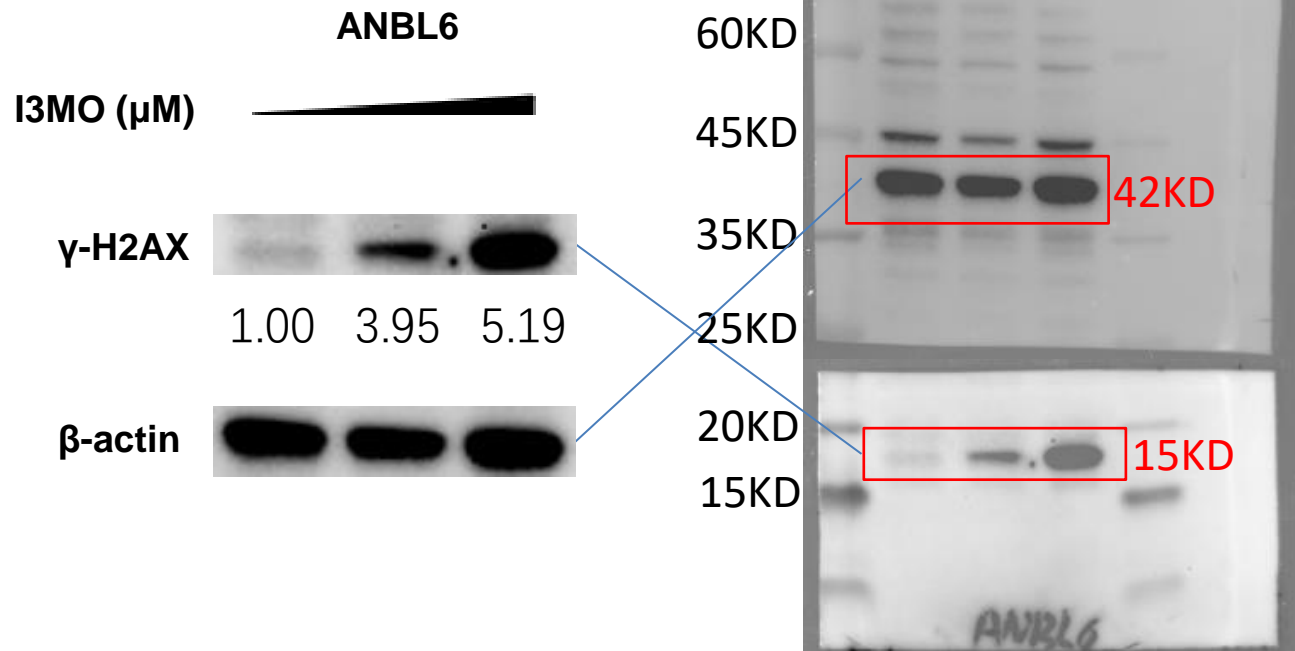

# Figure 5a

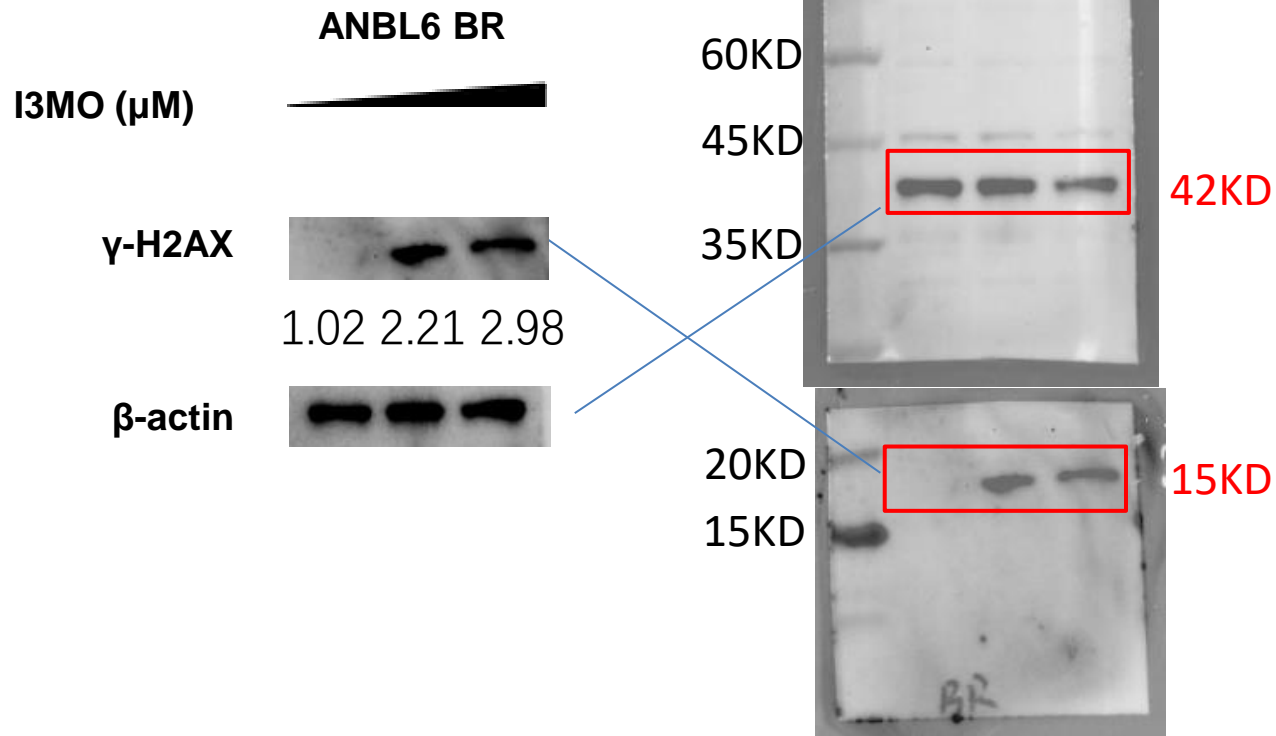

# Figure 5b

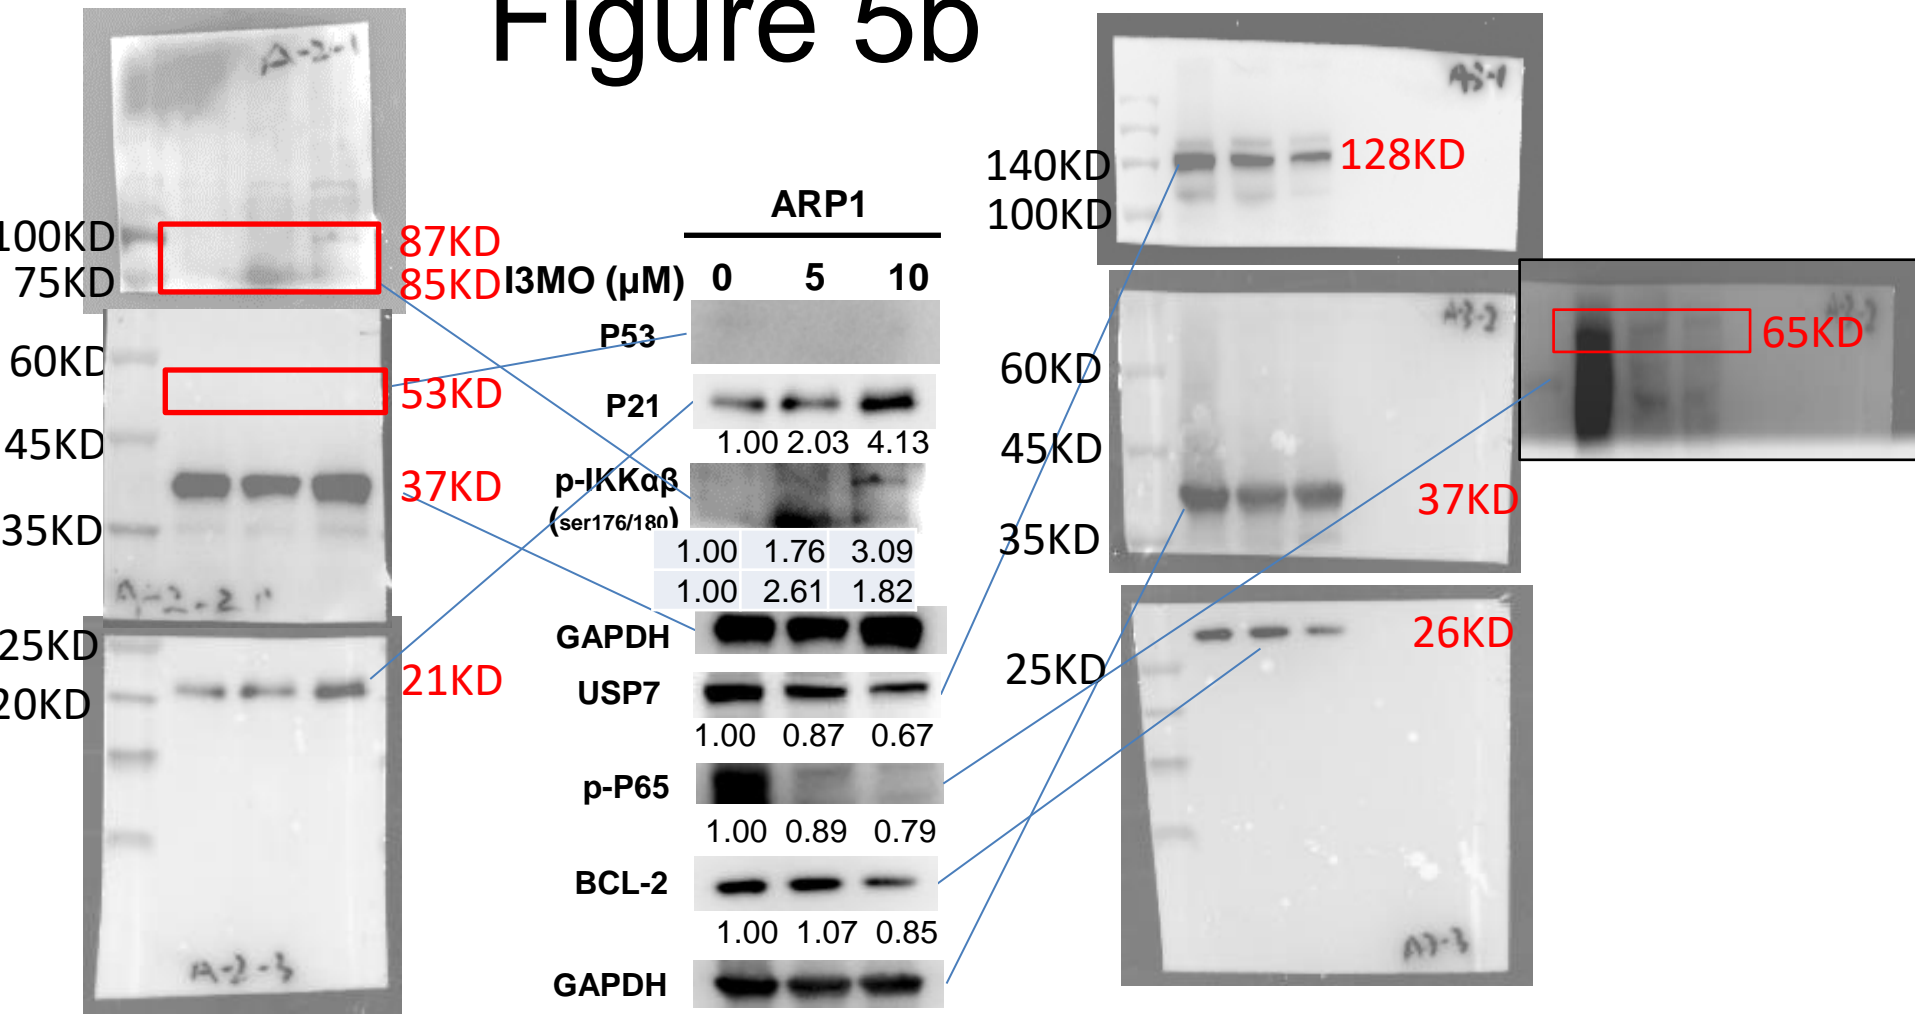

# Figure 5b

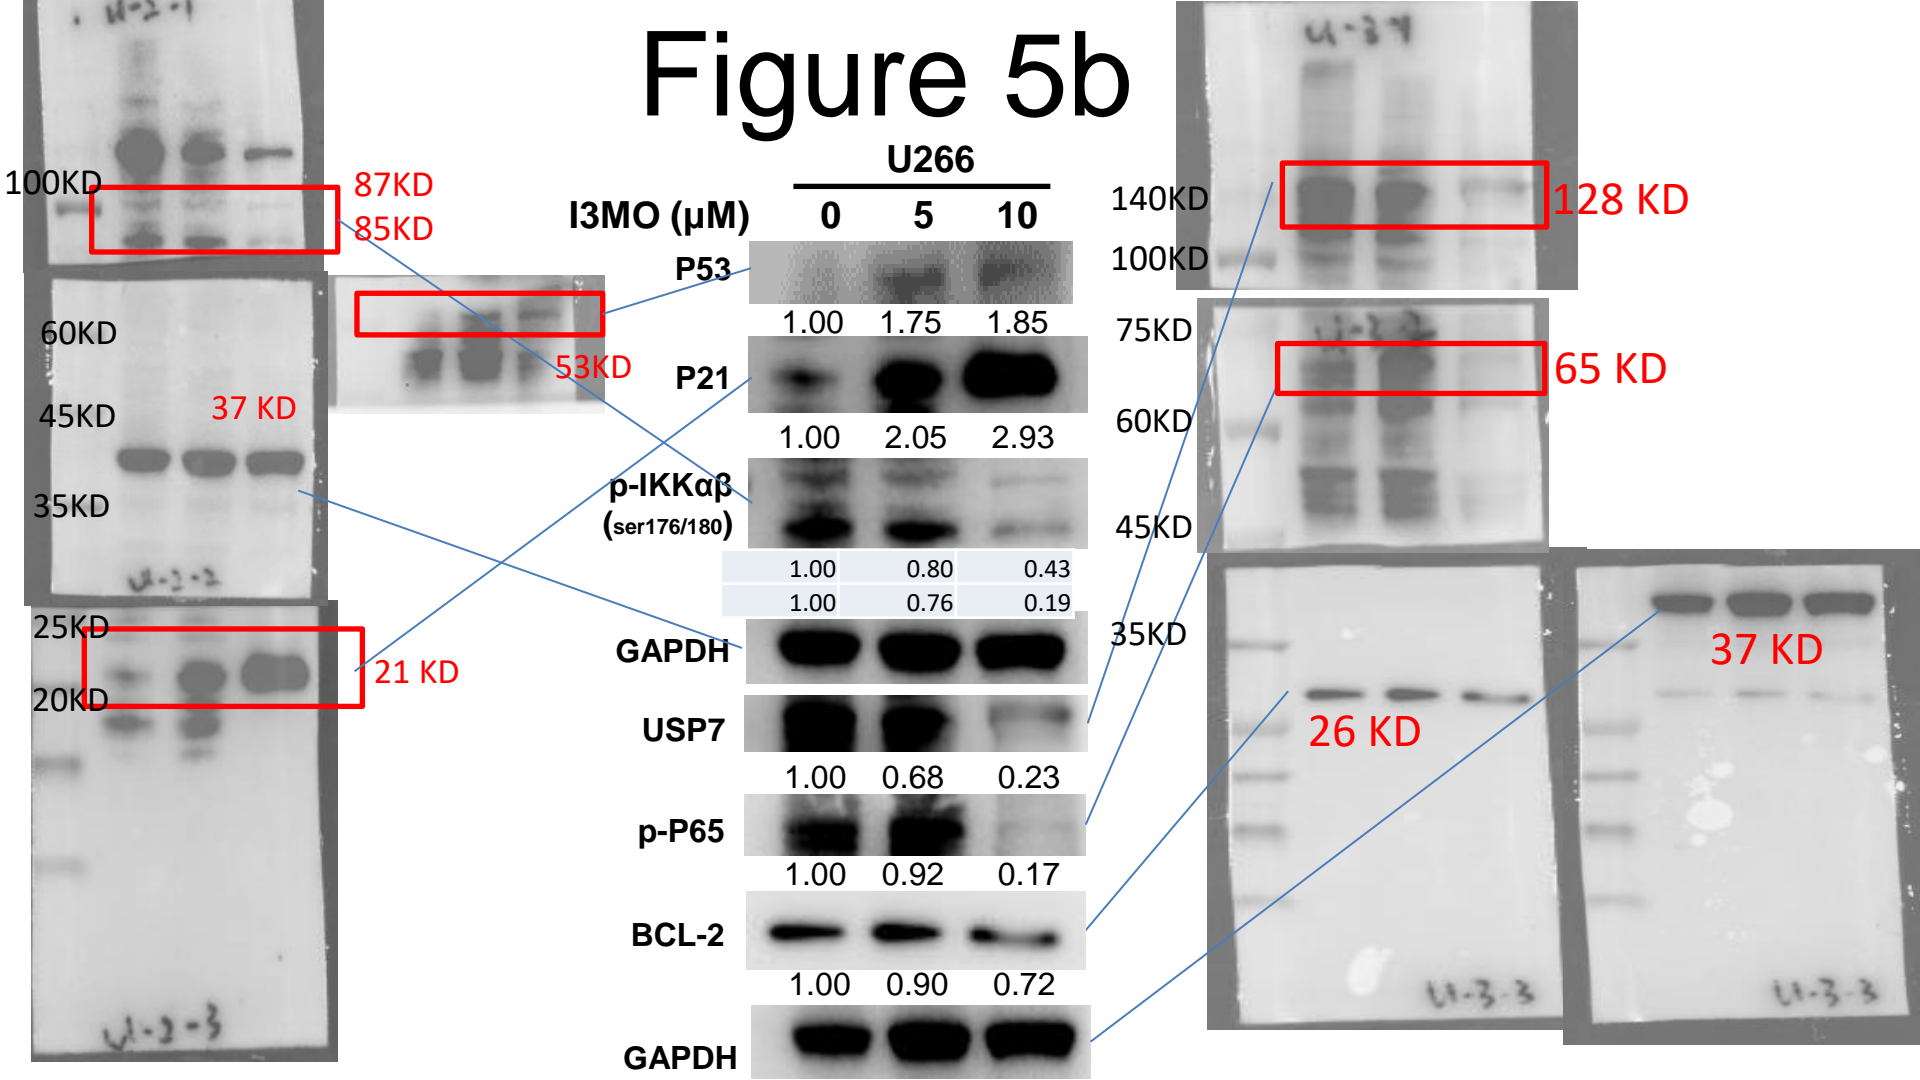

# Figure 5b

140KD  
100KD  
75KD

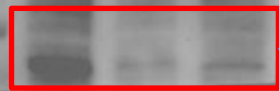

87KD  
85KD

60KD  
45KD  
35KD

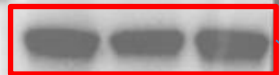

37 KD

25KD  
20KD

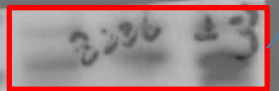

21 KD

RPMI8226

13MO ( $\mu\text{M}$ ) 0 5 10

P53

1.00 1.23 1.19

P21

1.00 1.26 1.41

p-IKK $\alpha\beta$   
(ser176/180)

1.00 0.34 0.56

1.00 0.31 0.43

GAPDH

USP7

1.00 0.51 0.53

p-P65

1.00 0.27 0.16

BCL-2

1.00 0.83 0.60

GAPDH

128KD

140KD  
100KD  
75KD

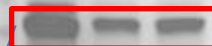

37KD

26KD

60KD  
45KD  
35KD

25KD

65KD

53K

# Figure 5b

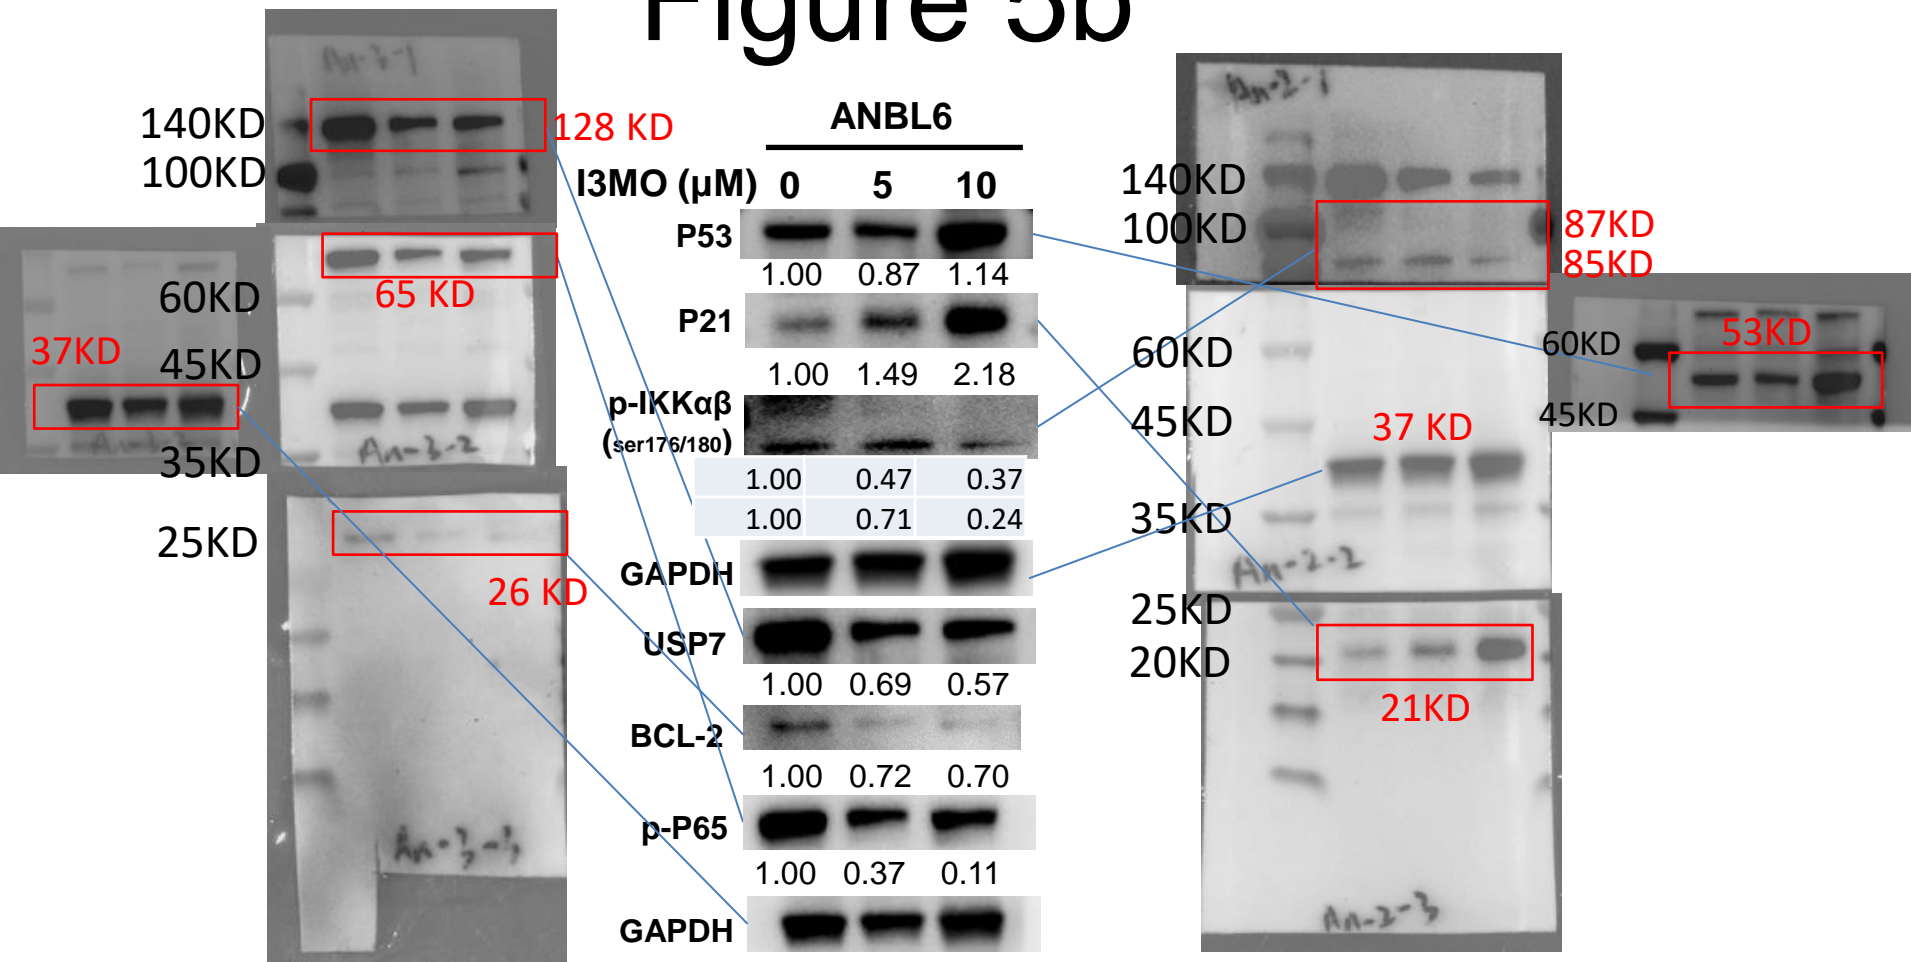

# Figure 5b

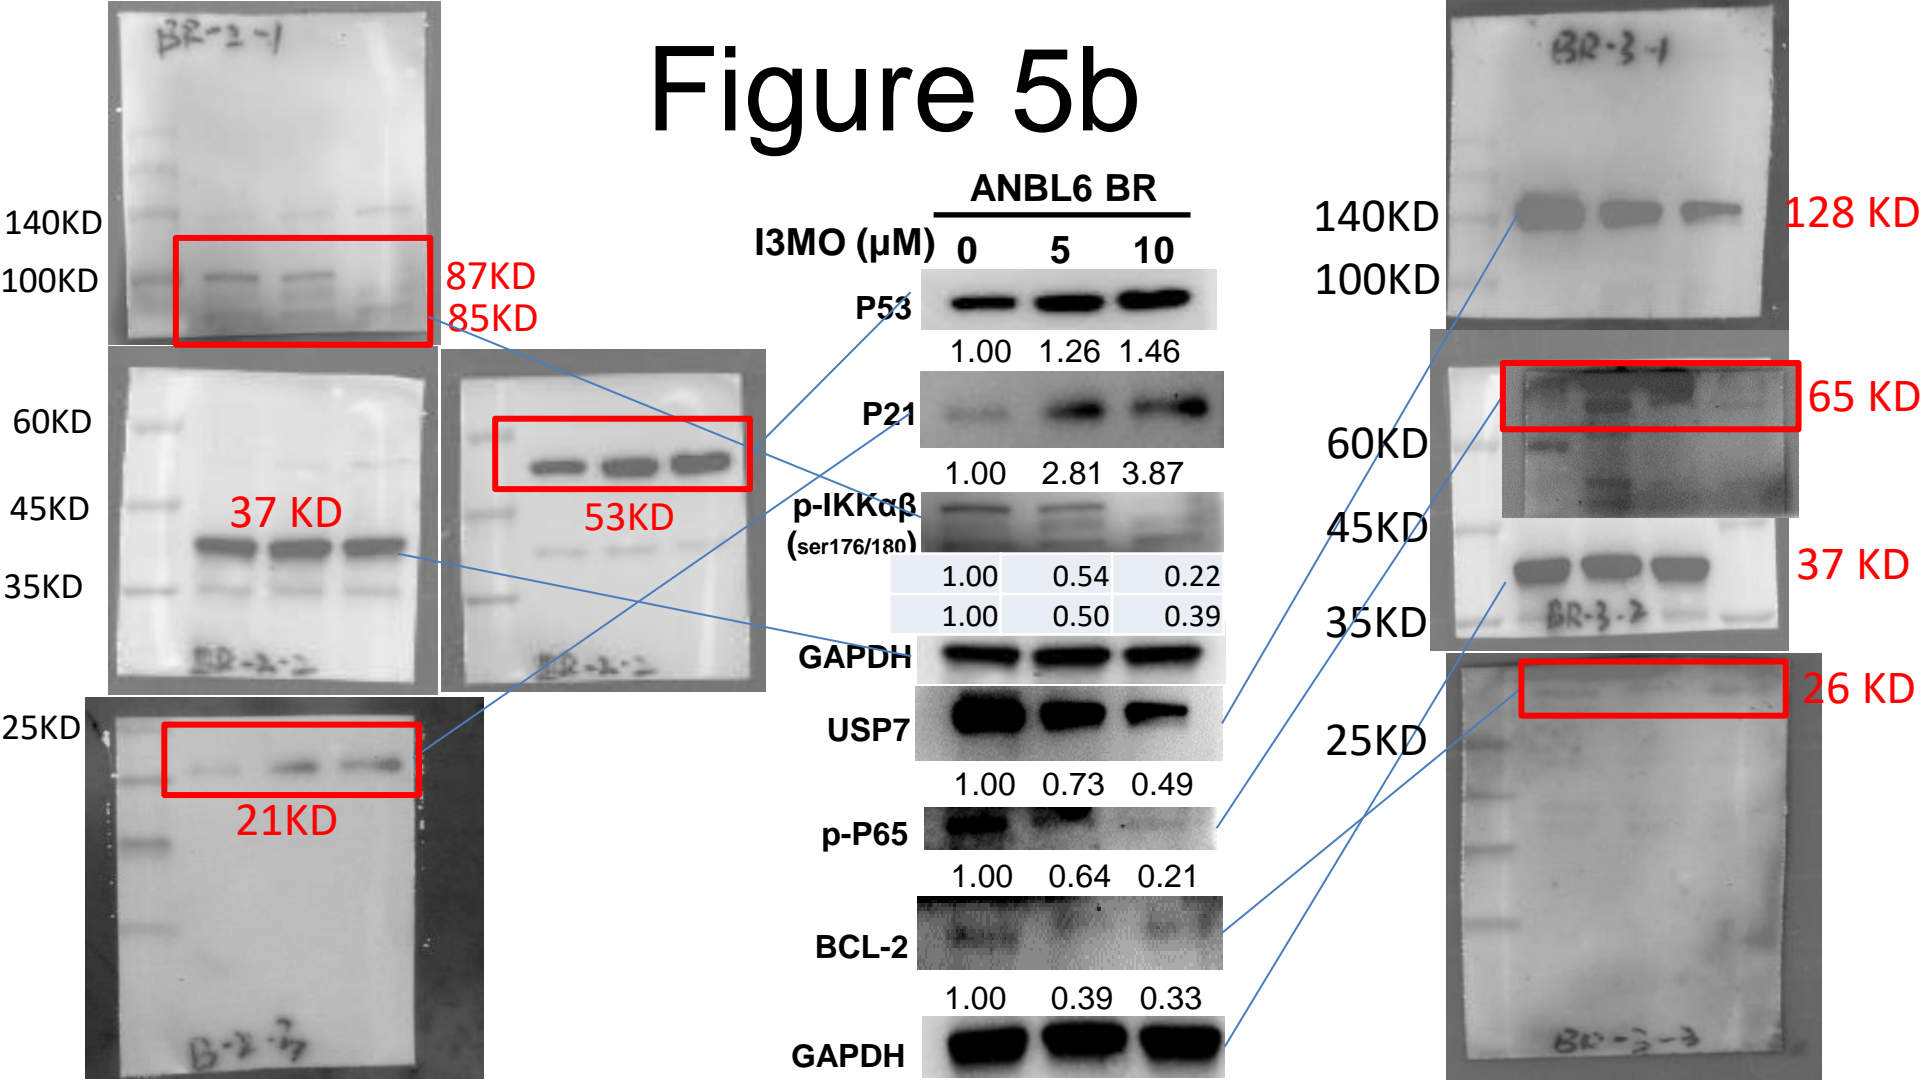

# Figure 5c

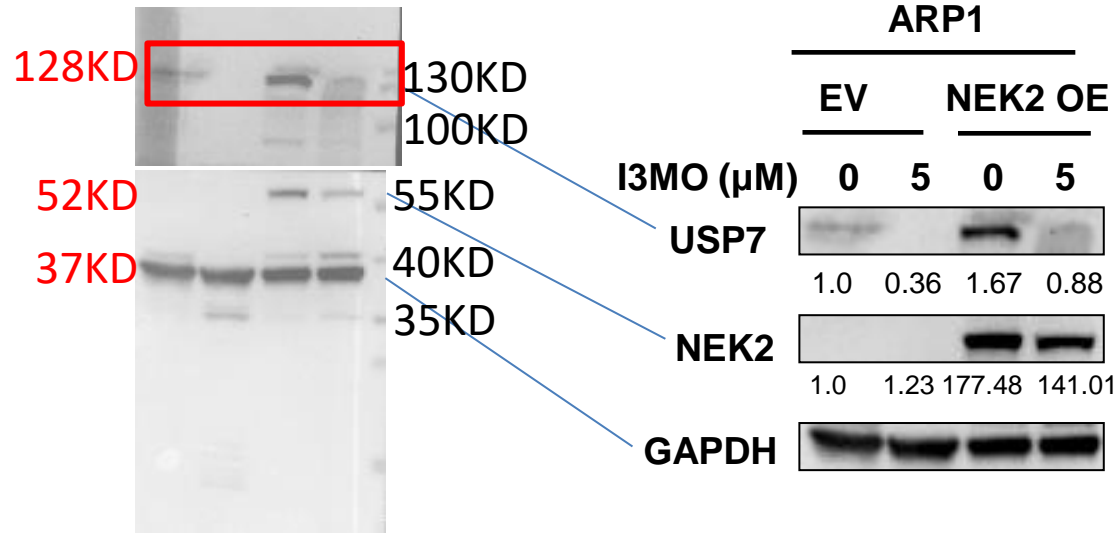



# Figure 5f

OCI-MY5

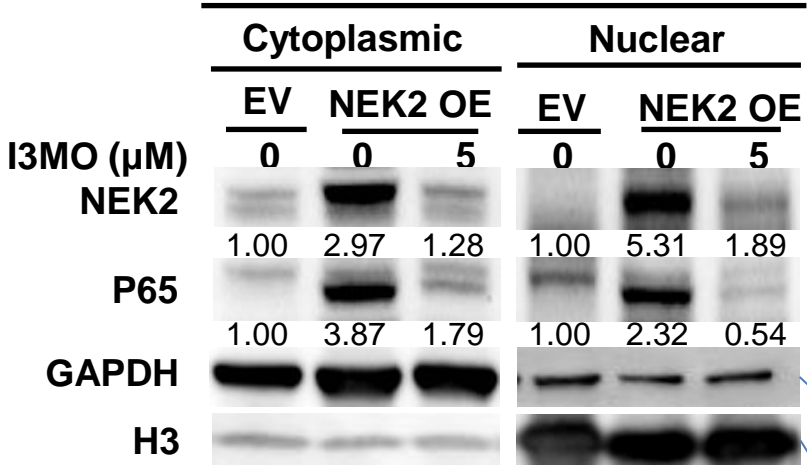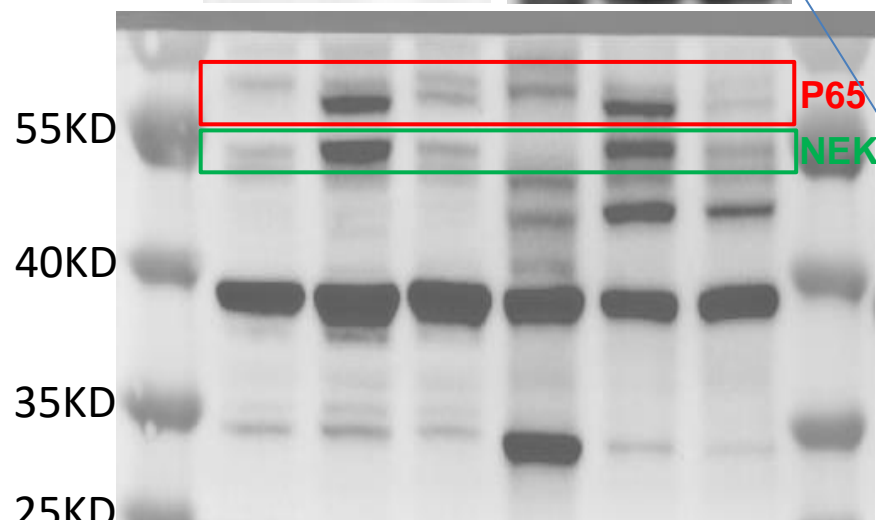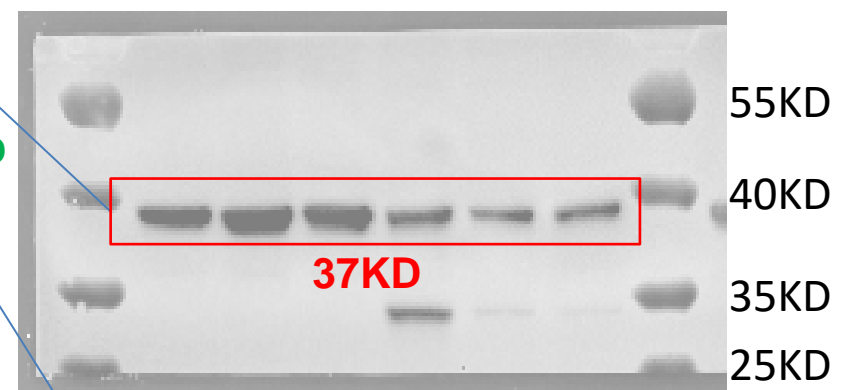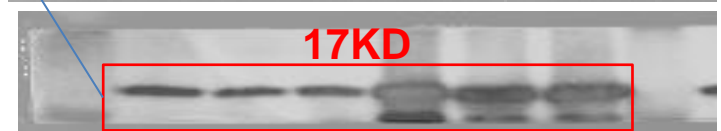

# Figure 6f

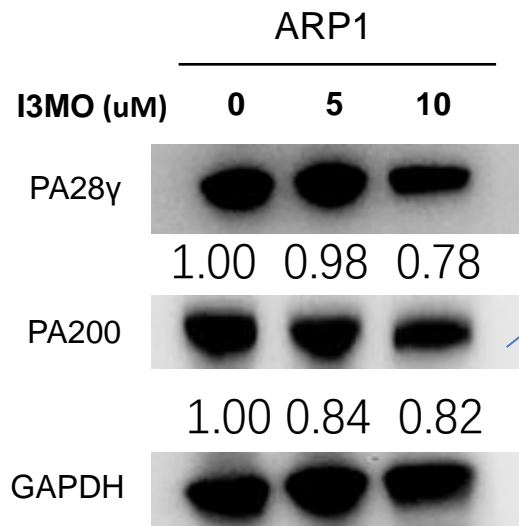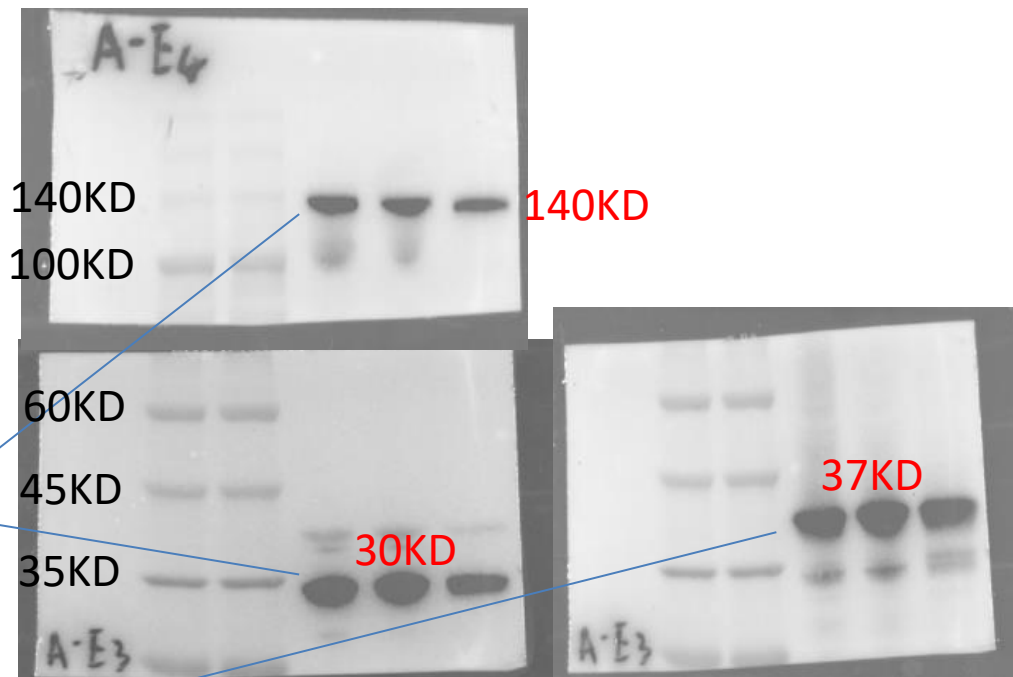

# Figure 6f

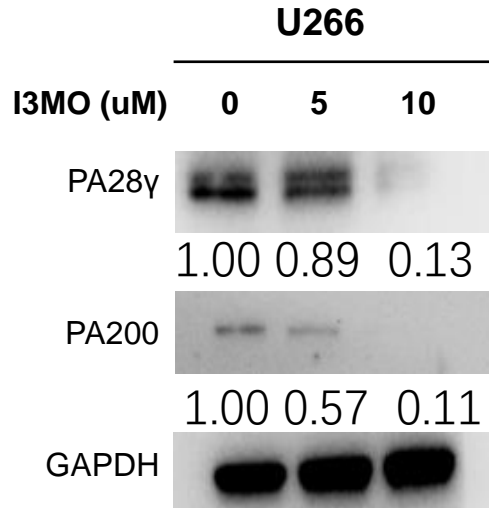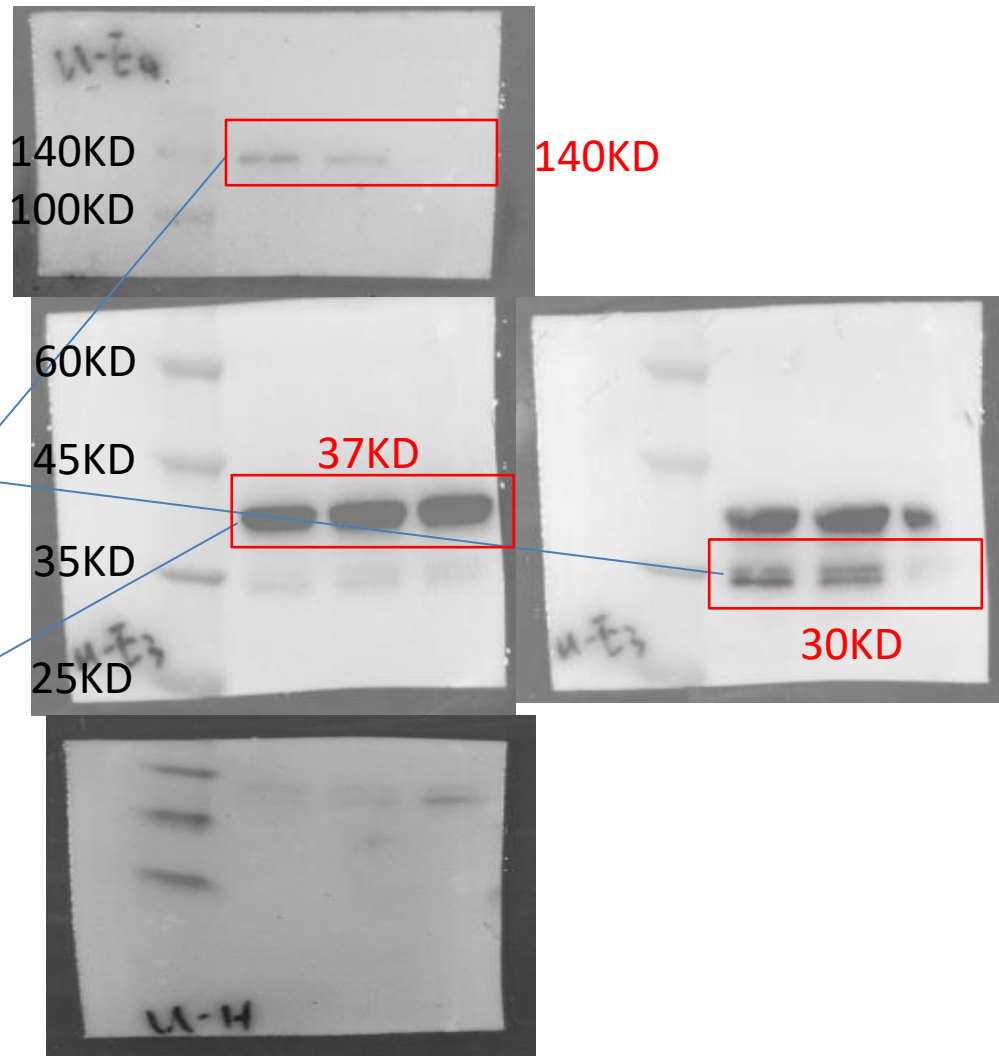

# Figure 6f

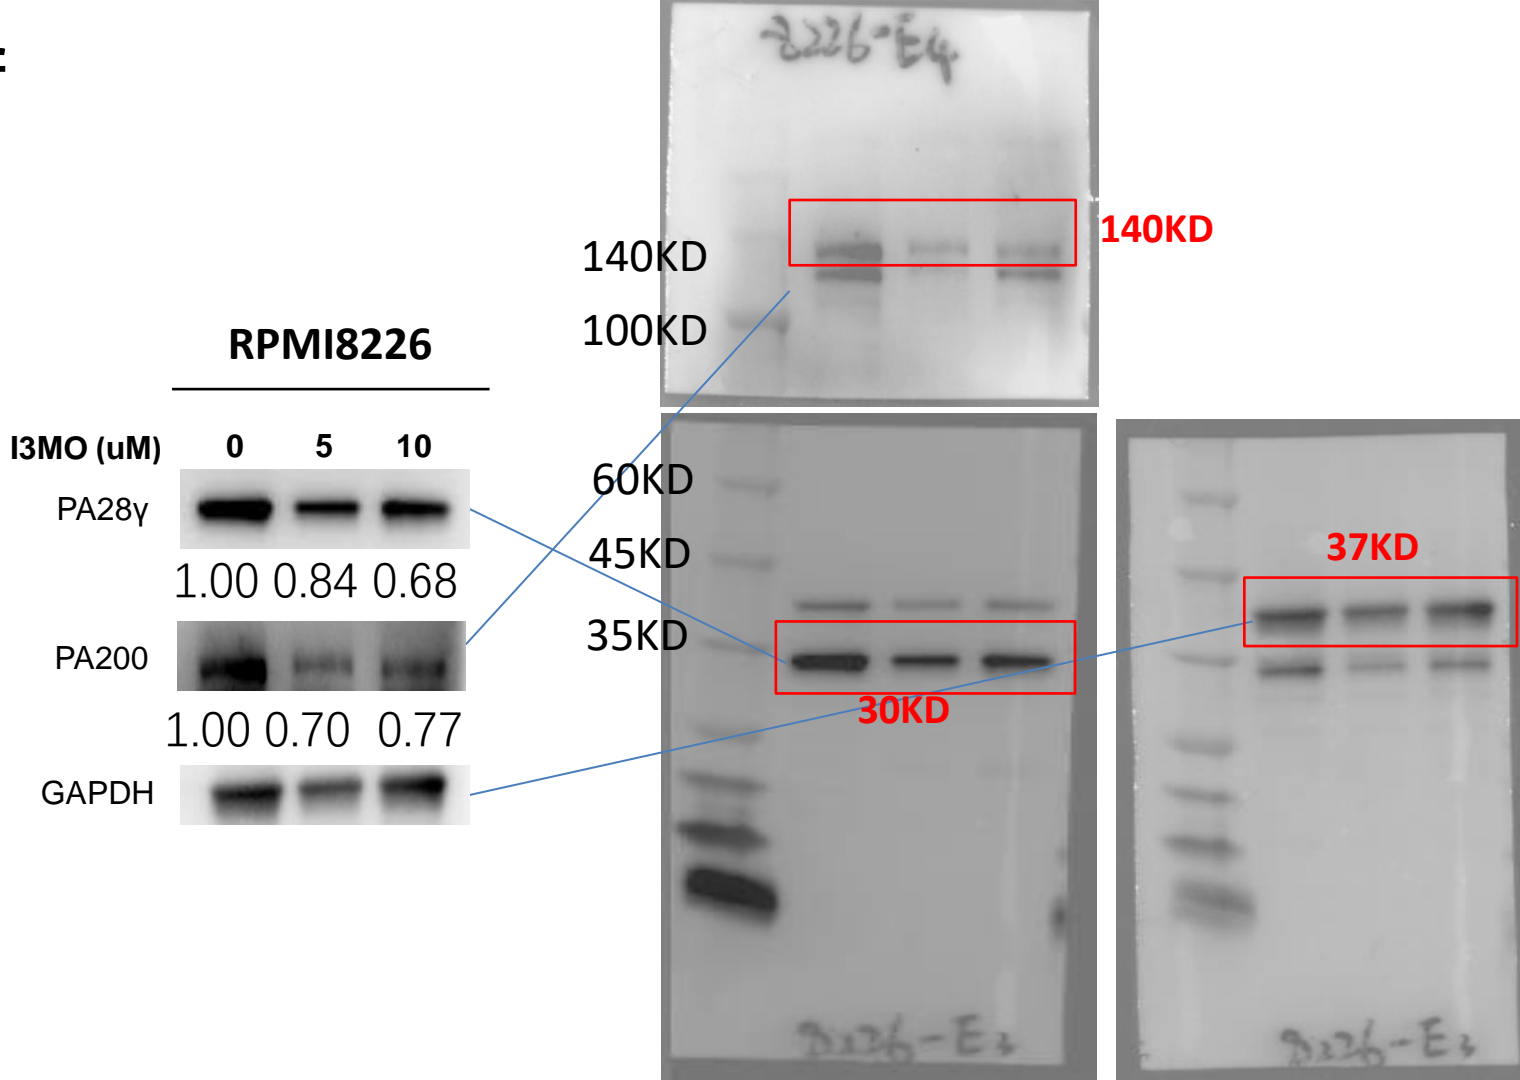

# Figure 6f

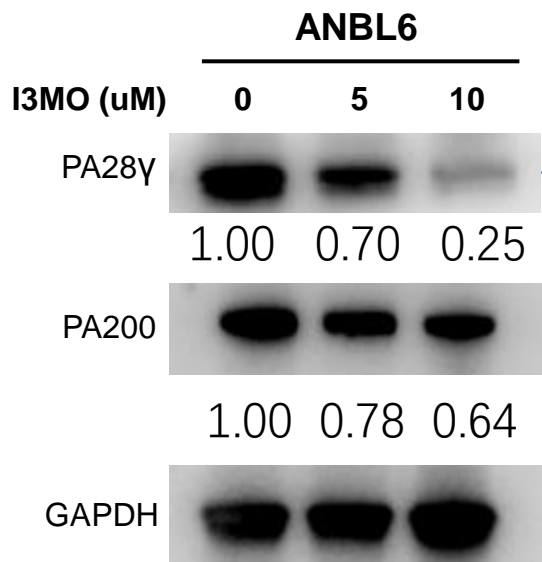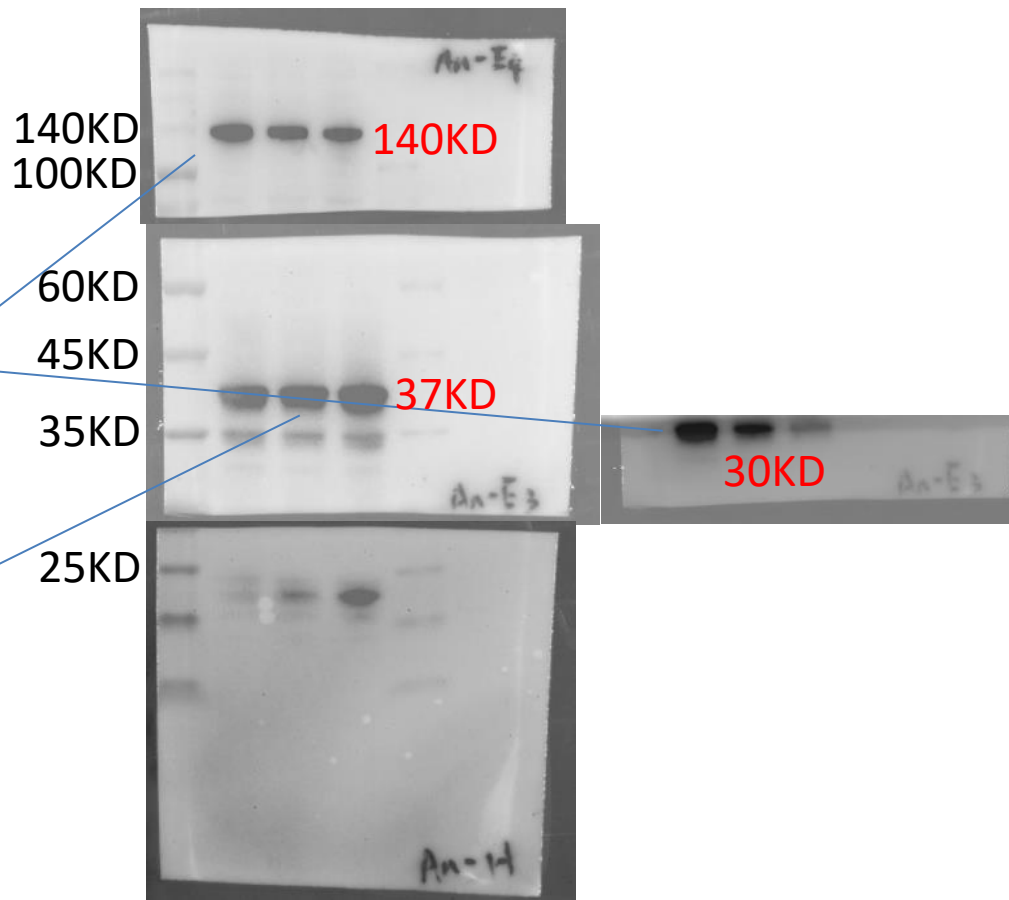

# Figure 6f

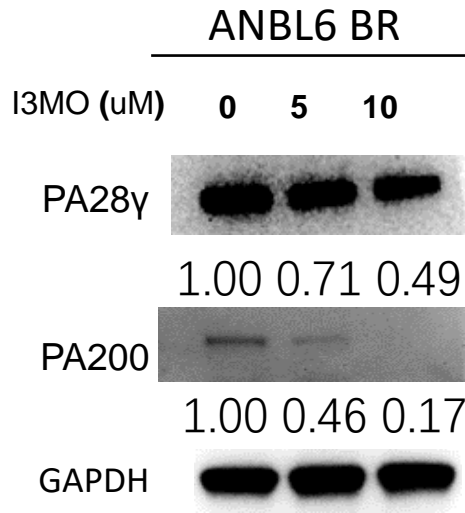

140KD  
100KD

60KD  
45KD  
35KD

20KD  
15KD

140KD

30KD

37KD

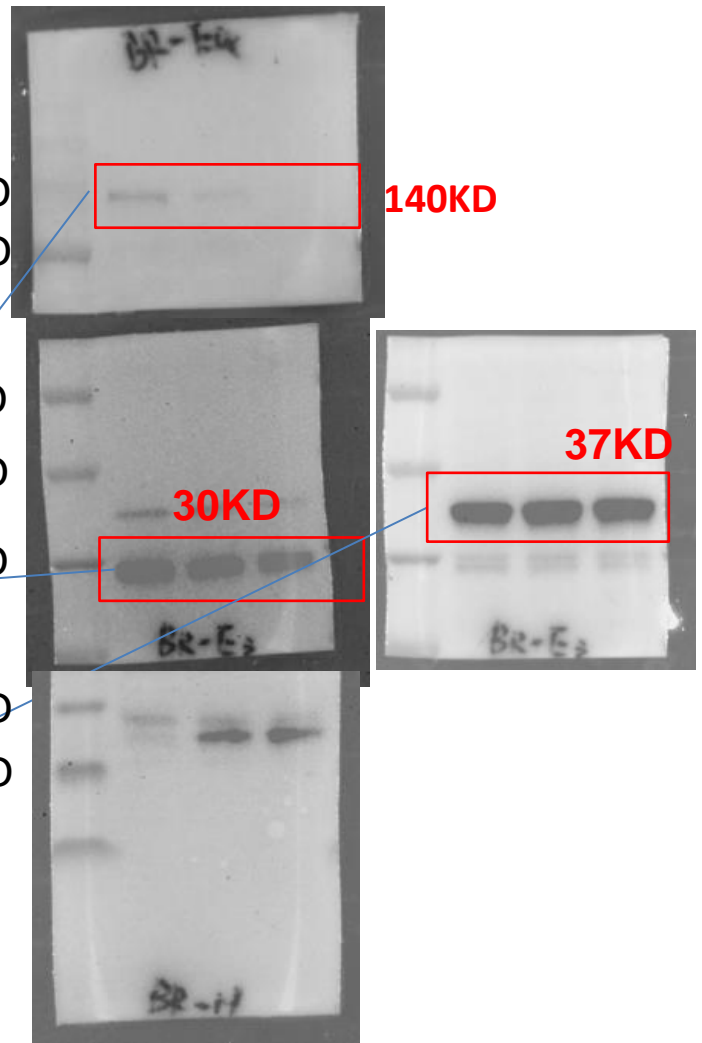

# Figure 7d

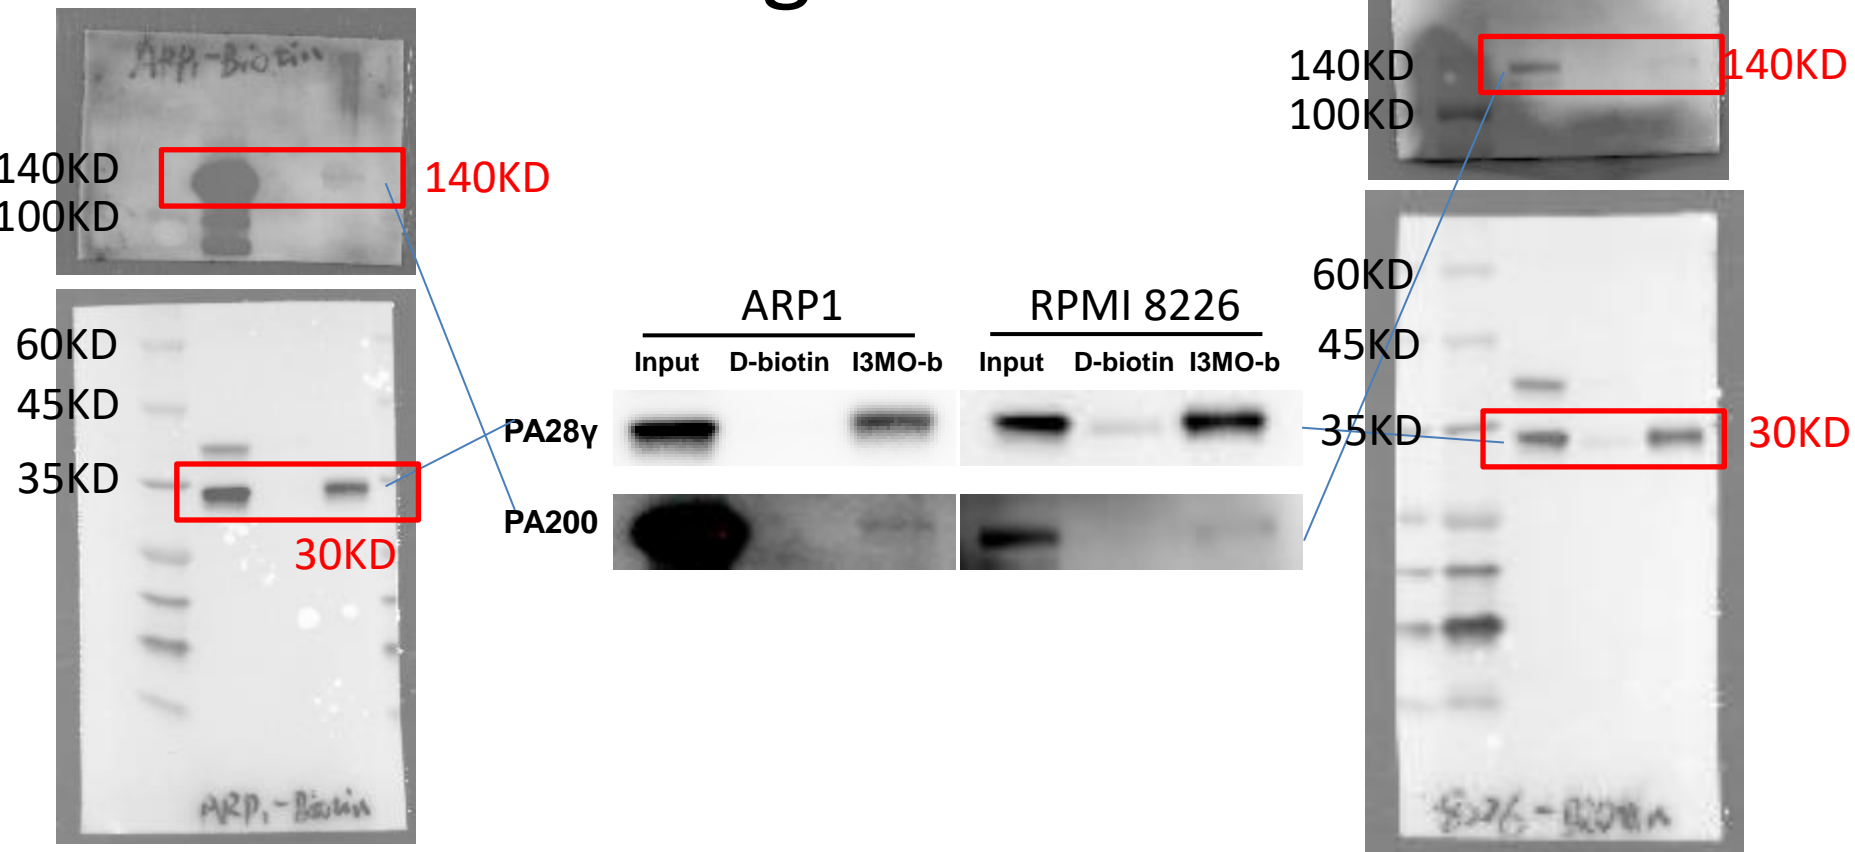

# Figure 7e

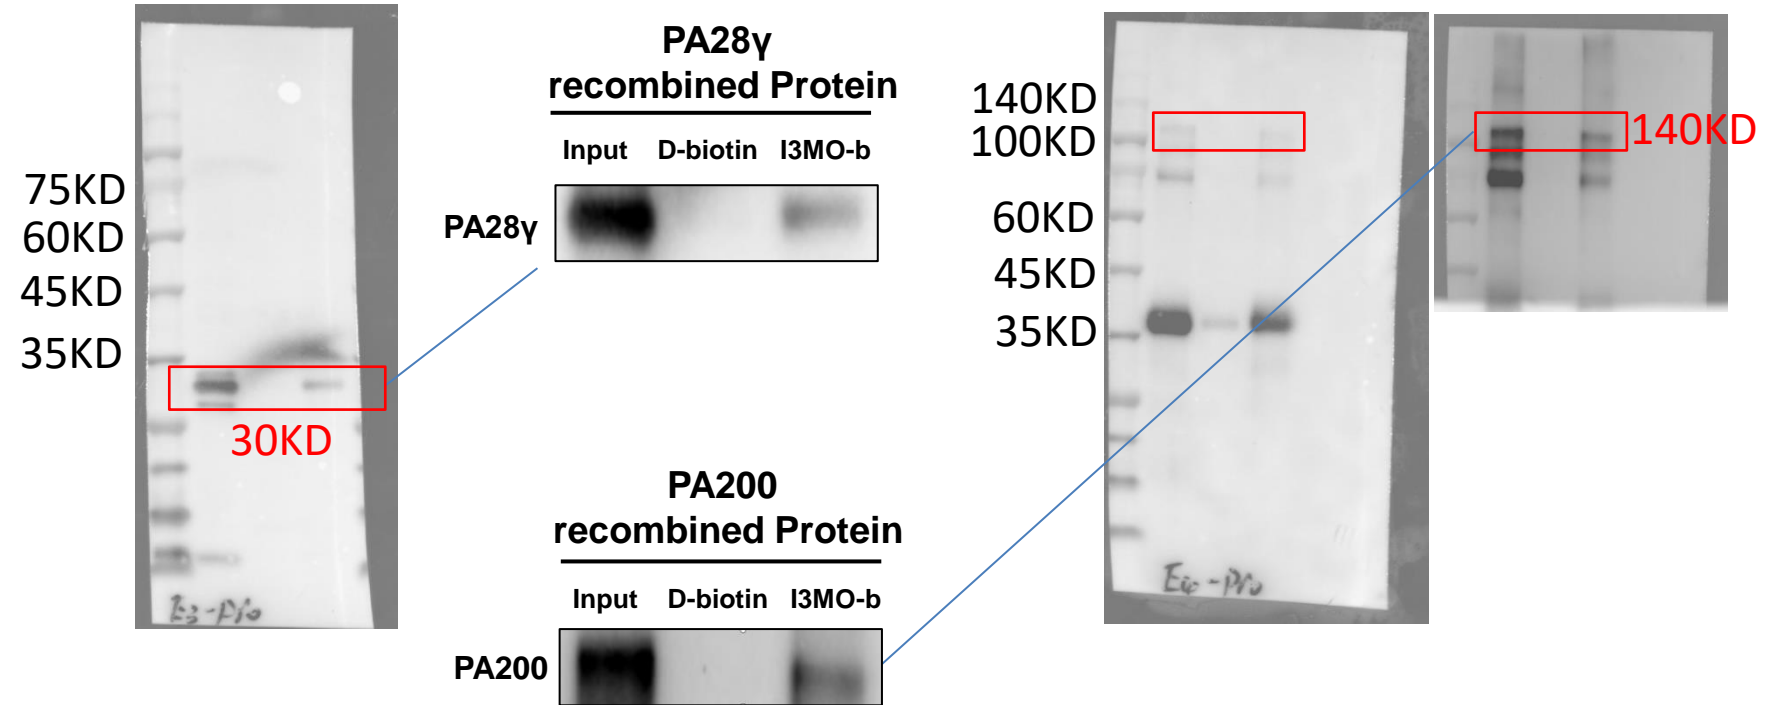



# Figure 7f

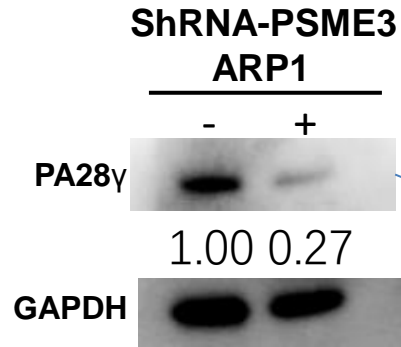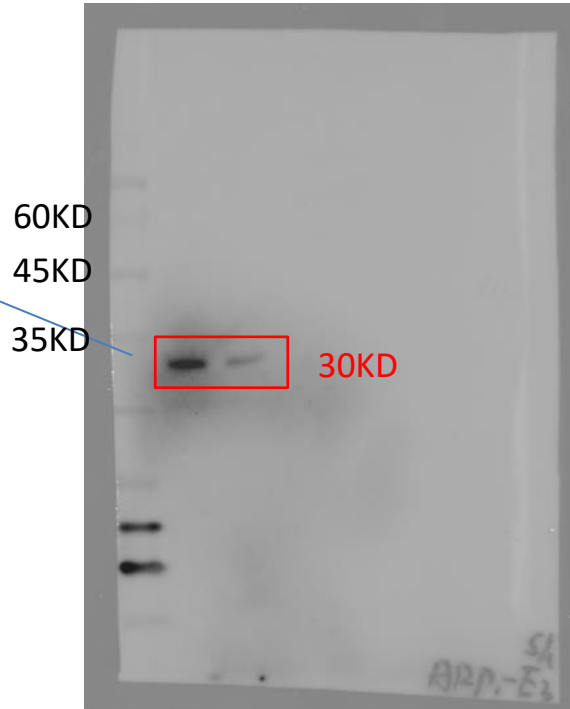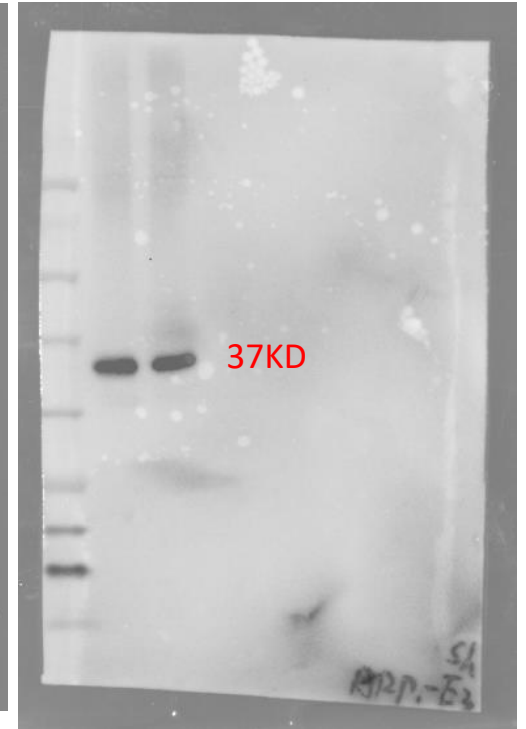

# Figure 7f

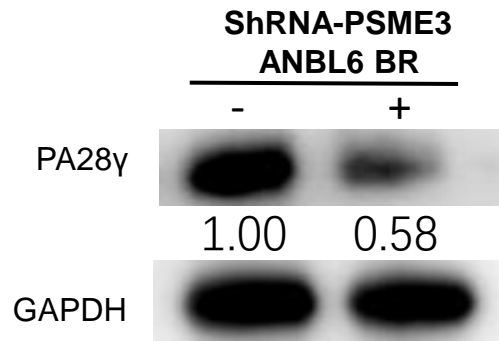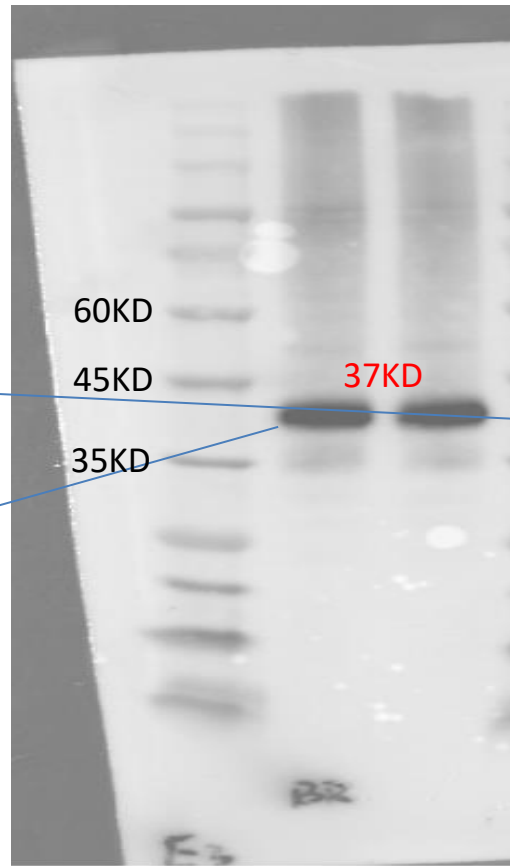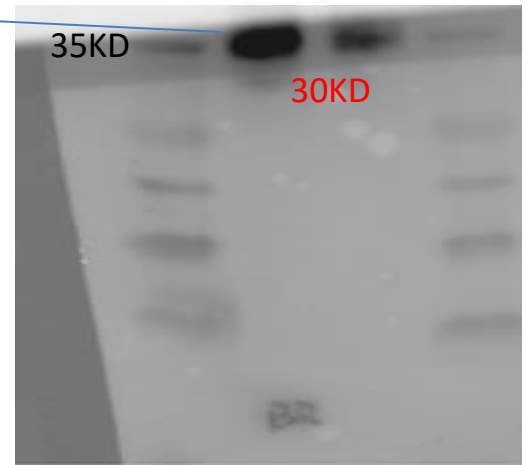

# Figure 7f

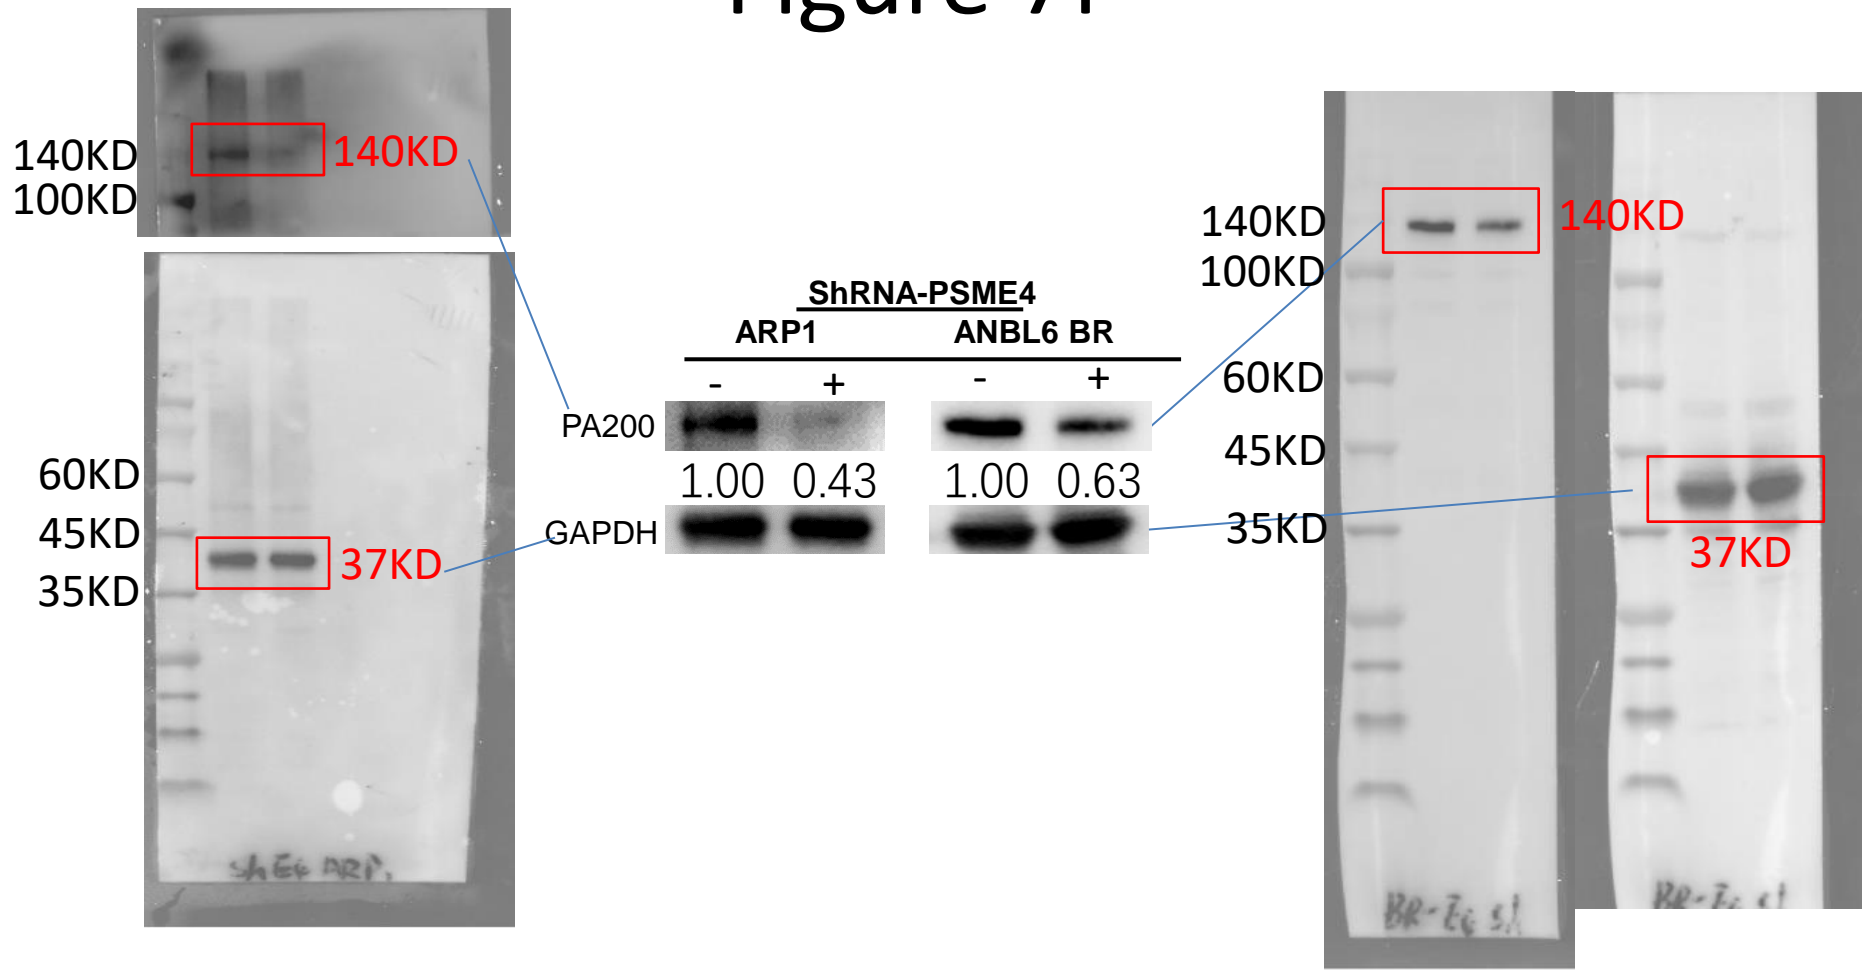

# Figure 9c

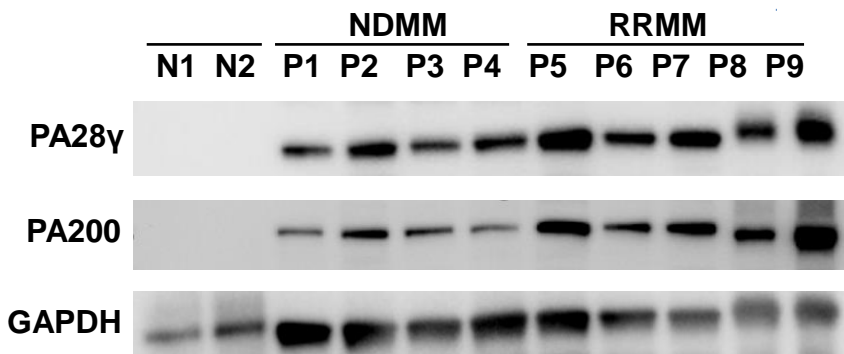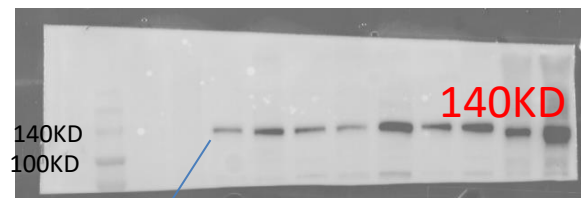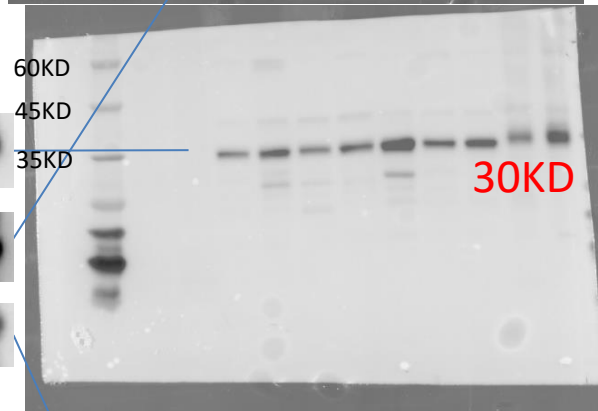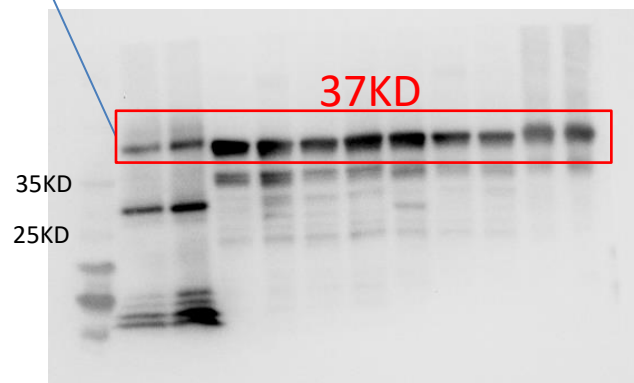

# Figure 9d

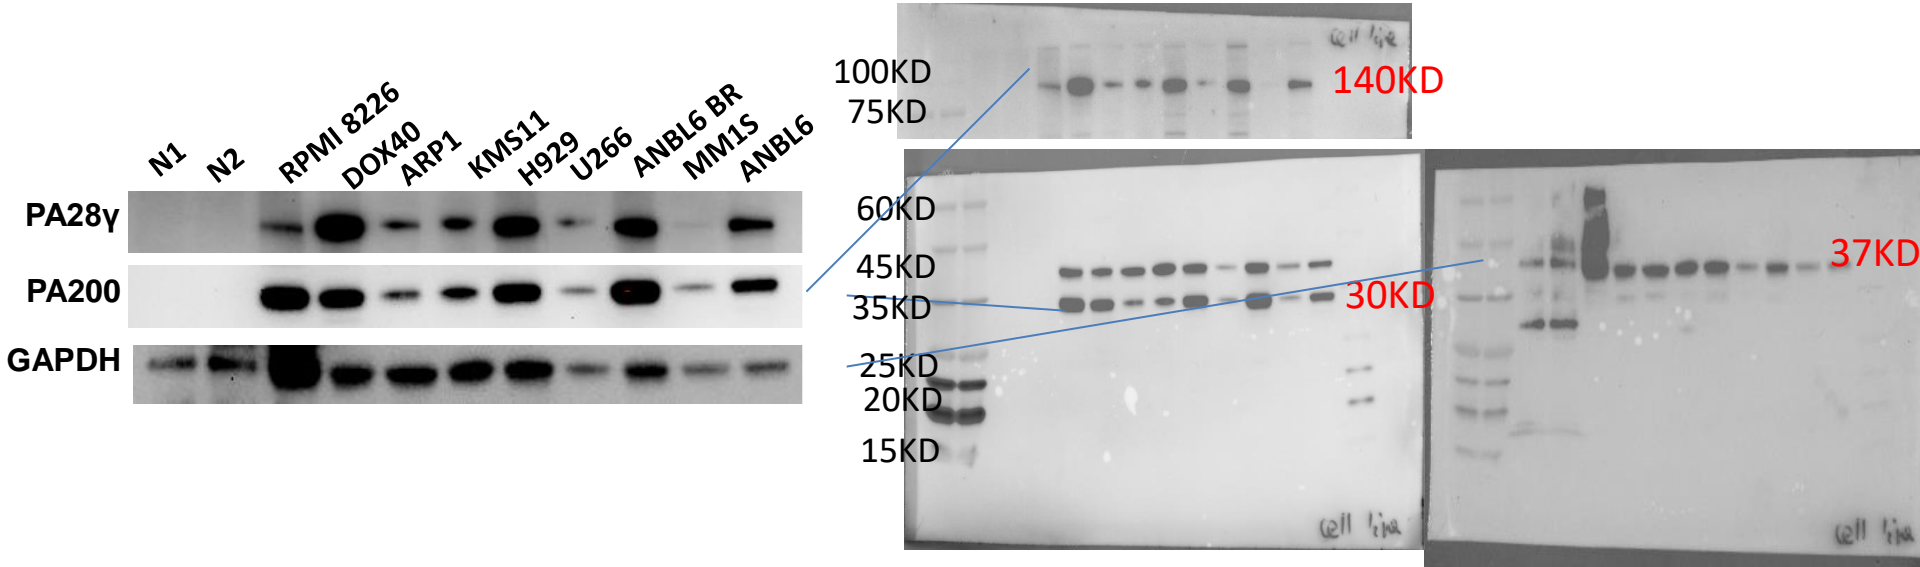

Supplement: mmc5.pdf [file mmc5.pdf]
